# Supplementary material for: Investigation of discriminatory attitude toward people living with HIV in the family context using socio-economic factors and information sources: A nationwide study in Indonesia
Source: PeerJ. 2022 Aug 3;10:e13841. doi: 10.7717/peerj.13841 (PMC9356582; doi:10.7717/peerj.13841)
Supplement: Supplemental Information 1 — Raw data exported from the 2017 Indonesian Demographic and Health Survey with the specific variables included in the study for data analysis. Raw data can be used after received an approval from Demographic and Health Survey. [file peerj-10-13841-s001.xls]

## Sheet: Sheet1
_Merge	wt	strata	screat	ashemed	fam_discriminatory	fam_discriminatory_attitude	Internet	radio	newspaper	television	health_professional	community_meeting	Seminar	School	information	information_HIV	age	education	residence	earning	gender
master only (1)	0.12798	59	No	No	0	No Discrimination	No	No	Yes	Yes	No	No	No	No	2	Some Information	35-49	highedu	rural	paid	Male
master only (1)	0.143678	54	No	No	0	No Discrimination	Yes	No	Yes	Yes	Yes	No	No	Yes	5	More Information	25-34	highedu	urban	paid	Male
master only (1)	0.231903	63	No	No	0	No Discrimination	Yes	No	No	No	No	No	No	No	1	Some Information	50-54	highedu	rural	paid	Male
master only (1)	0.260383	63	No	No	0	No Discrimination	No	No	No	Yes	No	No	No	No	1	Some Information	35-49	seconedu	rural	paid	Male
master only (1)	0.286804	37	No	No	0	No Discrimination	Yes	No	No	Yes	Yes	Yes	No	No	4	More Information	35-49	highedu	rural	paid	Male
master only (1)	0.286804	37	No	No	0	No Discrimination	Yes	No	Yes	Yes	No	No	No	No	3	Some Information	35-49	seconedu	rural	paid	Male
master only (1)	0.291305	36	No	No	0	No Discrimination	Yes	No	Yes	Yes	Yes	No	No	No	4	More Information	35-49	highedu	urban	paid	Male
master only (1)	0.325427	37	No	No	0	No Discrimination	No	No	No	No	Yes	Yes	No	No	2	Some Information	35-49	primaryedu	rural	paid	Male
master only (1)	0.325427	37	No	No	0	No Discrimination	No	Yes	No	No	No	No	No	No	1	Some Information	50-54	primaryedu	rural	paid	Male
master only (1)	0.355311	37	No	No	0	No Discrimination	No	No	No	No	No	No	No	No	0	No Information	35-49	seconedu	rural	no paid	Male
master only (1)	0.385883	14	No	No	0	No Discrimination	No	Yes	No	Yes	No	No	No	No	2	Some Information	25-34	seconedu	rural	paid	Male
master only (1)	0.421683	37	No	No	0	No Discrimination	No	No	No	Yes	No	No	No	No	1	Some Information	25-34	seconedu	rural	paid	Male
master only (1)	0.515534	67	No	No	0	No Discrimination	Yes	No	No	Yes	Yes	No	No	No	3	Some Information	25-34	seconedu	rural	paid	Male
master only (1)	0.760635	45	No	No	0	No Discrimination	No	Yes	No	Yes	No	No	No	No	2	Some Information	35-49	seconedu	rural	paid	Male
master only (1)	0.770133	38	No	No	0	No Discrimination	No	No	Yes	Yes	No	No	No	Yes	3	Some Information	35-49	seconedu	urban	paid	Male
master only (1)	0.888037	15	No	No	0	No Discrimination	No	No	No	Yes	No	No	No	No	1	Some Information	50-54	primaryedu	urban	paid	Male
master only (1)	1.01577	53	No	No	0	No Discrimination	No	No	No	No	No	No	No	No	0	No Information	35-49	seconedu	rural	paid	Male
master only (1)	1.05645	39	No	No	0	No Discrimination	No	No	No	Yes	No	No	No	No	1	Some Information	35-49	primaryedu	rural	paid	Male
master only (1)	1.06557	32	No	No	0	No Discrimination	No	No	No	No	No	No	No	Yes	1	Some Information	15-24	seconedu	urban	paid	Male
master only (1)	1.31336	33	No	No	0	No Discrimination	No	Yes	No	Yes	No	No	No	No	2	Some Information	35-49	primaryedu	rural	paid	Male
master only (1)	1.33767	22	No	No	0	No Discrimination	No	No	No	Yes	No	No	No	No	1	Some Information	50-54	primaryedu	urban	paid	Male
master only (1)	1.34985	16	No	No	0	No Discrimination	No	Yes	Yes	Yes	No	No	No	No	3	Some Information	35-49	seconedu	rural	paid	Male
master only (1)	1.49738	28	No	No	0	No Discrimination	No	No	No	Yes	No	No	No	No	1	Some Information	35-49	primaryedu	urban	paid	Male
master only (1)	1.58151	22	No	No	0	No Discrimination	Yes	No	No	Yes	No	No	No	No	2	Some Information	35-49	seconedu	urban	paid	Male
master only (1)	1.59048	22	No	No	0	No Discrimination	No	Yes	No	Yes	No	No	No	No	2	Some Information	35-49	seconedu	urban	paid	Male
master only (1)	1.61889	24	No	No	0	No Discrimination	Yes	No	Yes	Yes	No	No	No	No	3	Some Information	25-34	seconedu	urban	paid	Male
master only (1)	1.64357	24	No	No	0	No Discrimination	No	No	No	Yes	No	No	No	No	1	Some Information	35-49	seconedu	urban	paid	Male
master only (1)	1.69393	16	No	No	0	No Discrimination	No	No	No	No	No	No	No	No	0	No Information	25-34	primaryedu	rural	paid	Male
master only (1)	1.87233	25	No	No	0	No Discrimination	No	Yes	No	No	No	No	No	No	1	Some Information	25-34	seconedu	rural	paid	Male
master only (1)	1.92438	11	No	No	0	No Discrimination	No	No	No	No	No	Yes	No	No	1	Some Information	35-49	seconedu	urban	paid	Male
master only (1)	2.04421	29	No	No	0	No Discrimination	No	No	No	Yes	No	No	No	No	1	Some Information	35-49	primaryedu	rural	paid	Male
master only (1)	0.12798	59	No	No	0	No Discrimination	No	No	No	Yes	No	No	No	No	1	Some Information	25-34	seconedu	rural	paid	Male
master only (1)	0.136074	59	No	No	0	No Discrimination	Yes	No	Yes	Yes	No	No	No	No	3	Some Information	35-49	highedu	rural	paid	Male
master only (1)	0.326996	36	No	No	0	No Discrimination	Yes	Yes	Yes	Yes	Yes	Yes	No	Yes	7	More Information	35-49	seconedu	urban	paid	Male
master only (1)	1.12031	16	No	No	0	No Discrimination	No	No	No	No	No	No	No	No	0	No Information	25-34	highedu	rural	paid	Male
master only (1)	1.49738	28	No	No	0	No Discrimination	No	No	No	No	No	No	No	No	0	No Information	35-49	seconedu	urban	paid	Male
master only (1)	1.56238	22	No	No	0	No Discrimination	No	No	Yes	Yes	No	No	No	No	2	Some Information	35-49	seconedu	urban	paid	Male
master only (1)	1.58512	24	No	No	0	No Discrimination	No	No	No	Yes	No	No	No	Yes	2	Some Information	50-54	highedu	urban	paid	Male
master only (1)	2.88734	23	No	No	0	No Discrimination	No	No	No	Yes	No	No	No	No	1	Some Information	15-24	seconedu	rural	paid	Male
master only (1)	0.188932	59	No	No	0	No Discrimination	No	No	No	No	No	No	No	No	0	No Information	35-49	seconedu	rural	paid	Male
master only (1)	0.220375	19	No	No	0	No Discrimination	No	Yes	No	Yes	No	No	No	No	2	Some Information	35-49	primaryedu	urban	paid	Male
master only (1)	0.341217	18	No	No	0	No Discrimination	No	No	No	Yes	No	No	No	No	1	Some Information	25-34	primaryedu	rural	no paid	Male
master only (1)	0.362336	2	No	No	0	No Discrimination	No	No	No	Yes	No	No	No	No	1	Some Information	35-49	seconedu	rural	paid	Male
master only (1)	0.405443	37	No	No	0	No Discrimination	No	No	No	Yes	No	No	No	No	1	Some Information	35-49	seconedu	rural	no paid	Male
master only (1)	0.412998	37	No	No	0	No Discrimination	No	No	No	No	No	Yes	No	No	1	Some Information	35-49	primaryedu	rural	paid	Male
master only (1)	0.415846	2	No	No	0	No Discrimination	No	No	No	Yes	No	No	No	No	1	Some Information	35-49	primaryedu	rural	paid	Male
master only (1)	0.897643	39	No	No	0	No Discrimination	No	No	No	Yes	No	No	No	No	1	Some Information	35-49	seconedu	rural	paid	Male
master only (1)	1.0987	6	No	No	0	No Discrimination	No	No	No	Yes	No	No	No	No	1	Some Information	25-34	seconedu	rural	paid	Male
master only (1)	1.39445	22	No	No	0	No Discrimination	No	Yes	No	Yes	No	Yes	No	No	3	Some Information	35-49	seconedu	urban	paid	Male
master only (1)	0.239058	63	No	No	0	No Discrimination	No	No	Yes	Yes	No	No	No	No	2	Some Information	25-34	seconedu	rural	paid	Male
master only (1)	0.43468	44	No	No	0	No Discrimination	No	No	No	Yes	Yes	No	No	No	2	Some Information	35-49	seconedu	urban	paid	Male
master only (1)	0.436236	37	No	No	0	No Discrimination	No	No	No	Yes	No	No	No	No	1	Some Information	35-49	seconedu	rural	paid	Male
master only (1)	0.44517	14	No	No	0	No Discrimination	No	No	No	No	No	No	No	No	0	No Information	50-54	seconedu	rural	paid	Male
master only (1)	0.449101	14	No	No	0	No Discrimination	No	No	Yes	Yes	No	No	No	No	2	Some Information	35-49	highedu	rural	paid	Male
master only (1)	0.630012	38	No	No	0	No Discrimination	Yes	No	Yes	Yes	No	No	No	No	3	Some Information	25-34	highedu	urban	paid	Male
master only (1)	1.01233	43	No	No	0	No Discrimination	No	No	No	Yes	No	No	No	No	1	Some Information	35-49	primaryedu	rural	paid	Male
master only (1)	1.06747	5	No	No	0	No Discrimination	No	No	No	Yes	No	No	No	No	1	Some Information	35-49	primaryedu	urban	paid	Male
master only (1)	1.1571	6	No	No	0	No Discrimination	No	No	No	No	No	No	No	No	0	No Information	25-34	seconedu	rural	paid	Male
master only (1)	1.4868	38	No	No	0	No Discrimination	No	No	No	Yes	No	No	No	No	1	Some Information	35-49	seconedu	urban	paid	Male
master only (1)	1.69372	22	No	No	0	No Discrimination	No	No	Yes	Yes	No	No	No	No	2	Some Information	35-49	highedu	urban	paid	Male
master only (1)	1.00818	8	No	No	0	No Discrimination	No	No	No	Yes	No	No	No	No	1	Some Information	50-54	primaryedu	rural	paid	Male
master only (1)	2.15618	23	No	No	0	No Discrimination	No	No	No	Yes	No	No	No	No	1	Some Information	15-24	primaryedu	rural	paid	Male
master only (1)	0.291305	36	No	No	0	No Discrimination	No	No	Yes	No	Yes	No	No	No	2	Some Information	25-34	highedu	urban	paid	Male
master only (1)	0.69629	2	No	No	0	No Discrimination	No	No	No	No	No	No	No	No	0	No Information	25-34	primaryedu	rural	paid	Male
master only (1)	2.95557	23	No	No	0	No Discrimination	No	No	No	Yes	No	Yes	No	No	2	Some Information	35-49	primaryedu	rural	paid	Male
master only (1)	0.136074	59	No	No	0	No Discrimination	No	No	No	No	No	Yes	No	No	1	Some Information	35-49	primaryedu	rural	paid	Male
master only (1)	0.140116	47	No	No	0	No Discrimination	No	No	No	No	No	No	No	No	0	No Information	25-34	seconedu	rural	paid	Male
master only (1)	0.150624	46	No	No	0	No Discrimination	No	No	No	Yes	No	No	No	No	1	Some Information	35-49	seconedu	urban	paid	Male
master only (1)	0.154467	59	No	No	0	No Discrimination	No	No	No	No	Yes	No	No	No	1	Some Information	35-49	primaryedu	rural	paid	Male
master only (1)	0.157656	59	No	No	0	No Discrimination	No	No	No	No	Yes	No	No	No	1	Some Information	25-34	highedu	rural	paid	Male
master only (1)	0.161319	59	No	No	0	No Discrimination	No	No	No	Yes	No	No	No	No	1	Some Information	25-34	seconedu	rural	paid	Male
master only (1)	0.199351	54	No	No	0	No Discrimination	No	No	No	Yes	No	No	No	No	1	Some Information	35-49	seconedu	urban	paid	Male
master only (1)	0.208664	61	No	No	0	No Discrimination	No	No	Yes	Yes	No	No	No	No	2	Some Information	25-34	highedu	rural	no paid	Male
master only (1)	0.210571	36	No	No	0	No Discrimination	No	No	No	No	Yes	Yes	No	No	2	Some Information	35-49	seconedu	urban	paid	Male
master only (1)	0.232201	1	No	No	0	No Discrimination	No	No	No	Yes	Yes	No	No	No	2	Some Information	35-49	primaryedu	urban	paid	Male
master only (1)	0.242935	56	No	No	0	No Discrimination	No	No	No	No	No	No	No	No	0	No Information	15-24	primaryedu	urban	paid	Male
master only (1)	0.275853	54	No	No	0	No Discrimination	No	No	No	Yes	No	No	No	No	1	Some Information	25-34	seconedu	urban	paid	Male
master only (1)	0.300071	36	No	No	0	No Discrimination	No	No	No	No	No	No	No	No	0	No Information	25-34	seconedu	urban	paid	Male
master only (1)	0.308639	54	No	No	0	No Discrimination	No	No	No	Yes	No	No	No	No	1	Some Information	35-49	primaryedu	urban	paid	Male
master only (1)	0.317819	57	No	No	0	No Discrimination	No	No	No	Yes	No	No	No	No	1	Some Information	35-49	seconedu	rural	paid	Male
master only (1)	0.318069	1	No	No	0	No Discrimination	Yes	No	Yes	Yes	No	No	No	No	3	Some Information	35-49	highedu	urban	paid	Male
master only (1)	0.329758	17	No	No	0	No Discrimination	No	No	No	Yes	No	No	No	No	1	Some Information	35-49	seconedu	urban	no paid	Male
master only (1)	0.359729	57	No	No	0	No Discrimination	No	No	No	Yes	No	No	No	No	1	Some Information	35-49	seconedu	rural	paid	Male
master only (1)	0.409794	56	No	No	0	No Discrimination	Yes	Yes	No	Yes	No	No	No	No	3	Some Information	35-49	seconedu	urban	paid	Male
master only (1)	0.436215	18	No	No	0	No Discrimination	No	No	Yes	Yes	No	No	No	No	2	Some Information	35-49	seconedu	rural	no paid	Male
master only (1)	0.514142	44	No	No	0	No Discrimination	No	No	Yes	Yes	No	No	No	No	2	Some Information	35-49	seconedu	urban	paid	Male
master only (1)	0.693315	52	No	No	0	No Discrimination	No	No	No	Yes	No	No	No	No	1	Some Information	50-54	primaryedu	urban	paid	Male
master only (1)	0.745363	11	No	No	0	No Discrimination	No	Yes	No	Yes	Yes	No	No	No	3	Some Information	25-34	seconedu	urban	paid	Male
master only (1)	0.789586	45	No	No	0	No Discrimination	No	No	No	No	No	No	No	No	0	No Information	35-49	seconedu	rural	paid	Male
master only (1)	0.850206	26	No	No	0	No Discrimination	No	No	Yes	Yes	No	No	No	No	2	Some Information	35-49	seconedu	urban	paid	Male
master only (1)	0.855805	15	No	No	0	No Discrimination	No	No	No	Yes	No	No	No	No	1	Some Information	35-49	seconedu	urban	paid	Male
master only (1)	0.909279	32	No	No	0	No Discrimination	No	No	No	Yes	No	No	No	No	1	Some Information	35-49	primaryedu	urban	paid	Male
master only (1)	0.914613	33	No	No	0	No Discrimination	No	No	Yes	Yes	No	No	No	No	2	Some Information	50-54	seconedu	rural	paid	Male
master only (1)	0.995923	35	No	No	0	No Discrimination	No	No	No	Yes	No	No	No	No	1	Some Information	50-54	primaryedu	rural	paid	Male
master only (1)	1.14907	21	No	No	0	No Discrimination	No	No	No	Yes	No	No	No	No	1	Some Information	35-49	seconedu	urban	paid	Male
master only (1)	1.18324	43	No	No	0	No Discrimination	No	No	No	Yes	No	No	No	No	1	Some Information	35-49	primaryedu	rural	paid	Male
master only (1)	1.2952	28	No	No	0	No Discrimination	No	No	No	Yes	No	No	No	Yes	2	Some Information	35-49	seconedu	urban	no paid	Male
master only (1)	1.3318	33	No	No	0	No Discrimination	Yes	No	Yes	Yes	No	No	No	No	3	Some Information	25-34	seconedu	rural	paid	Male
master only (1)	1.61577	22	No	No	0	No Discrimination	No	No	No	Yes	Yes	No	No	No	2	Some Information	35-49	seconedu	urban	paid	Male
master only (1)	1.70818	24	No	No	0	No Discrimination	No	Yes	No	Yes	No	No	No	No	2	Some Information	35-49	primaryedu	urban	paid	Male
master only (1)	1.80097	22	No	No	0	No Discrimination	No	No	No	Yes	Yes	No	No	No	2	Some Information	25-34	seconedu	urban	paid	Male
master only (1)	1.85901	24	No	No	0	No Discrimination	No	No	No	Yes	No	No	No	No	1	Some Information	35-49	seconedu	urban	paid	Male
master only (1)	1.99455	22	No	No	0	No Discrimination	No	No	No	Yes	No	No	No	No	1	Some Information	35-49	seconedu	urban	paid	Male
master only (1)	2.12078	25	No	No	0	No Discrimination	No	No	No	Yes	No	No	No	No	1	Some Information	50-54	primaryedu	rural	paid	Male
master only (1)	2.46182	32	No	No	0	No Discrimination	No	Yes	No	Yes	No	No	No	No	2	Some Information	25-34	primaryedu	urban	paid	Male
master only (1)	2.46182	32	No	No	0	No Discrimination	Yes	Yes	Yes	Yes	No	No	No	No	4	More Information	35-49	seconedu	urban	paid	Male
master only (1)	0.132078	59	No	No	0	No Discrimination	No	No	No	Yes	No	No	No	No	1	Some Information	25-34	seconedu	rural	paid	Male
master only (1)	0.260846	55	No	No	0	No Discrimination	No	No	No	Yes	No	No	No	No	1	Some Information	15-24	seconedu	rural	paid	Male
master only (1)	0.447492	1	No	No	0	No Discrimination	No	No	Yes	No	Yes	No	No	No	2	Some Information	35-49	seconedu	urban	paid	Male
master only (1)	0.458887	37	No	No	0	No Discrimination	No	No	No	Yes	No	No	No	No	1	Some Information	50-54	primaryedu	rural	paid	Male
master only (1)	0.98465	21	No	No	0	No Discrimination	No	No	Yes	Yes	No	No	No	No	2	Some Information	35-49	primaryedu	urban	paid	Male
master only (1)	1.32164	28	No	No	0	No Discrimination	No	No	Yes	Yes	No	No	No	No	2	Some Information	35-49	seconedu	urban	paid	Male
master only (1)	1.6119	28	No	No	0	No Discrimination	Yes	No	Yes	Yes	No	No	No	No	3	Some Information	35-49	highedu	urban	paid	Male
master only (1)	2.16036	29	No	No	0	No Discrimination	No	No	No	Yes	No	No	No	No	1	Some Information	25-34	primaryedu	rural	paid	Male
master only (1)	2.46182	32	No	No	0	No Discrimination	Yes	Yes	No	Yes	No	No	No	No	3	Some Information	25-34	primaryedu	urban	paid	Male
master only (1)	0.12798	59	No	No	0	No Discrimination	No	No	No	Yes	No	No	No	No	1	Some Information	35-49	seconedu	rural	paid	Male
master only (1)	0.120739	46	No	No	0	No Discrimination	No	No	No	No	Yes	No	No	No	1	Some Information	35-49	seconedu	urban	paid	Male
master only (1)	0.186077	62	No	No	0	No Discrimination	No	No	No	No	No	No	No	No	0	No Information	35-49	seconedu	urban	paid	Male
master only (1)	0.199351	54	No	No	0	No Discrimination	No	No	No	Yes	No	No	No	No	1	Some Information	25-34	highedu	urban	paid	Male
master only (1)	0.226355	63	No	No	0	No Discrimination	No	No	No	Yes	No	No	No	No	1	Some Information	35-49	seconedu	rural	paid	Male
master only (1)	0.249533	63	No	No	0	No Discrimination	No	No	No	No	No	No	No	No	0	No Information	25-34	seconedu	rural	paid	Male
master only (1)	0.282928	2	No	No	0	No Discrimination	No	No	Yes	Yes	No	No	No	No	2	Some Information	50-54	highedu	rural	paid	Male
master only (1)	0.286443	55	No	No	0	No Discrimination	No	No	No	Yes	No	No	No	No	1	Some Information	50-54	highedu	rural	paid	Male
master only (1)	0.322589	55	No	No	0	No Discrimination	No	No	No	Yes	No	No	No	No	1	Some Information	35-49	primaryedu	rural	paid	Male
master only (1)	0.327489	40	No	No	0	No Discrimination	No	No	No	Yes	No	No	No	No	1	Some Information	35-49	seconedu	urban	paid	Male
master only (1)	0.329192	55	No	No	0	No Discrimination	No	No	Yes	Yes	Yes	Yes	No	Yes	5	More Information	25-34	highedu	rural	no paid	Male
master only (1)	0.329321	37	No	No	0	No Discrimination	No	No	No	No	No	No	No	No	0	No Information	15-24	highedu	rural	paid	Male
master only (1)	0.347127	44	No	No	0	No Discrimination	No	No	No	Yes	No	No	No	No	1	Some Information	35-49	seconedu	urban	paid	Male
master only (1)	0.347127	44	No	No	0	No Discrimination	No	No	No	No	No	No	No	No	0	No Information	25-34	primaryedu	urban	paid	Male
master only (1)	0.348748	2	No	No	0	No Discrimination	No	No	No	Yes	Yes	No	No	No	2	Some Information	35-49	seconedu	rural	paid	Male
master only (1)	0.354439	40	No	No	0	No Discrimination	No	No	No	Yes	No	No	No	No	1	Some Information	25-34	seconedu	urban	paid	Male
master only (1)	0.502823	51	No	No	0	No Discrimination	No	No	No	Yes	No	No	No	No	1	Some Information	25-34	primaryedu	rural	paid	Male
master only (1)	0.551766	13	No	No	0	No Discrimination	No	No	No	Yes	Yes	No	No	No	2	Some Information	50-54	seconedu	urban	paid	Male
master only (1)	0.697509	15	No	No	0	No Discrimination	No	No	No	Yes	No	No	No	No	1	Some Information	25-34	seconedu	urban	paid	Male
master only (1)	0.704883	21	No	No	0	No Discrimination	Yes	No	No	Yes	No	No	No	No	2	Some Information	25-34	highedu	urban	paid	Male
master only (1)	0.760195	4	No	No	0	No Discrimination	Yes	Yes	Yes	Yes	No	No	No	No	4	More Information	25-34	seconedu	rural	paid	Male
master only (1)	0.774054	52	No	No	0	No Discrimination	No	No	No	Yes	No	No	No	No	1	Some Information	35-49	primaryedu	urban	paid	Male
master only (1)	0.82386	3	No	No	0	No Discrimination	No	No	No	Yes	No	No	No	No	1	Some Information	35-49	seconedu	urban	paid	Male
master only (1)	0.903217	21	No	No	0	No Discrimination	Yes	No	No	Yes	No	No	No	No	2	Some Information	25-34	highedu	urban	paid	Male
master only (1)	0.925666	15	No	No	0	No Discrimination	Yes	Yes	No	Yes	No	No	No	No	3	Some Information	25-34	highedu	urban	paid	Male
master only (1)	1.03111	21	No	No	0	No Discrimination	No	No	No	No	No	No	No	No	0	No Information	25-34	seconedu	urban	paid	Male
master only (1)	1.04736	31	No	No	0	No Discrimination	No	Yes	Yes	Yes	No	No	No	No	3	Some Information	50-54	highedu	rural	paid	Male
master only (1)	1.08264	3	No	No	0	No Discrimination	No	No	Yes	No	No	No	No	No	1	Some Information	25-34	seconedu	urban	paid	Male
master only (1)	1.0987	6	No	No	0	No Discrimination	No	No	No	Yes	No	No	No	No	1	Some Information	35-49	seconedu	rural	paid	Male
master only (1)	1.18772	10	No	No	0	No Discrimination	No	No	No	Yes	No	No	No	No	1	Some Information	35-49	seconedu	rural	paid	Male
master only (1)	1.29217	21	No	No	0	No Discrimination	No	No	No	Yes	No	No	No	No	1	Some Information	25-34	seconedu	urban	paid	Male
master only (1)	1.31336	33	No	No	0	No Discrimination	No	No	No	No	No	No	No	No	0	No Information	25-34	seconedu	rural	paid	Male
master only (1)	1.40231	12	No	No	0	No Discrimination	Yes	Yes	No	Yes	Yes	Yes	No	No	5	More Information	50-54	seconedu	rural	paid	Male
master only (1)	1.40312	10	No	No	0	No Discrimination	No	No	No	Yes	No	No	No	No	1	Some Information	35-49	seconedu	rural	paid	Male
master only (1)	1.40994	22	No	No	0	No Discrimination	No	No	No	Yes	No	No	No	No	1	Some Information	25-34	seconedu	urban	paid	Male
master only (1)	1.52885	22	No	No	0	No Discrimination	No	No	No	No	No	No	No	No	0	No Information	25-34	seconedu	urban	paid	Male
master only (1)	1.53133	28	No	No	0	No Discrimination	No	No	No	Yes	No	No	No	No	1	Some Information	50-54	primaryedu	urban	paid	Male
master only (1)	1.59915	24	No	No	0	No Discrimination	No	No	Yes	Yes	No	No	No	No	2	Some Information	35-49	seconedu	urban	paid	Male
master only (1)	1.61958	31	No	No	0	No Discrimination	No	No	No	Yes	No	No	No	No	1	Some Information	35-49	primaryedu	rural	paid	Male
master only (1)	1.93889	25	No	No	0	No Discrimination	No	No	No	Yes	No	No	No	No	1	Some Information	35-49	primaryedu	rural	paid	Male
master only (1)	2.45834	29	No	No	0	No Discrimination	No	No	No	Yes	No	No	No	No	1	Some Information	35-49	primaryedu	rural	paid	Male
master only (1)	2.45834	29	No	No	0	No Discrimination	No	No	No	Yes	No	No	No	No	1	Some Information	35-49	primaryedu	rural	paid	Male
master only (1)	0.129098	60	No	No	0	No Discrimination	No	No	No	No	No	No	No	No	0	No Information	15-24	seconedu	urban	paid	Male
master only (1)	0.143273	46	No	No	0	No Discrimination	Yes	No	No	Yes	No	No	No	Yes	3	Some Information	25-34	seconedu	urban	paid	Male
master only (1)	0.148258	60	No	No	0	No Discrimination	No	Yes	No	Yes	No	No	No	No	2	Some Information	25-34	seconedu	urban	paid	Male
master only (1)	0.16446	60	No	No	0	No Discrimination	No	No	No	Yes	No	No	No	No	1	Some Information	25-34	highedu	urban	paid	Male
master only (1)	0.168318	60	No	No	0	No Discrimination	Yes	No	Yes	Yes	No	No	No	Yes	4	More Information	35-49	highedu	urban	paid	Male
master only (1)	0.20904	63	No	No	0	No Discrimination	No	No	No	Yes	No	No	No	No	1	Some Information	35-49	seconedu	rural	paid	Male
master only (1)	0.232201	1	No	No	0	No Discrimination	No	No	Yes	Yes	Yes	No	No	No	3	Some Information	35-49	seconedu	urban	paid	Male
master only (1)	0.241952	17	No	No	0	No Discrimination	No	No	No	Yes	No	No	No	No	1	Some Information	25-34	seconedu	urban	paid	Male
master only (1)	0.252114	17	No	No	0	No Discrimination	Yes	No	No	Yes	No	No	No	No	2	Some Information	35-49	seconedu	urban	paid	Male
master only (1)	0.291305	36	No	No	0	No Discrimination	Yes	No	Yes	Yes	Yes	No	No	No	4	More Information	35-49	highedu	urban	paid	Male
master only (1)	0.298311	56	No	No	0	No Discrimination	No	No	No	Yes	No	No	No	No	1	Some Information	35-49	primaryedu	urban	paid	Male
master only (1)	0.307555	50	No	No	0	No Discrimination	No	No	No	Yes	No	No	No	No	1	Some Information	35-49	highedu	urban	paid	Male
master only (1)	0.313364	50	No	No	0	No Discrimination	Yes	No	No	Yes	No	No	No	No	2	Some Information	35-49	highedu	urban	paid	Male
master only (1)	0.333585	1	No	No	0	No Discrimination	No	No	No	Yes	Yes	No	No	No	2	Some Information	25-34	seconedu	urban	paid	Male
master only (1)	0.341217	18	No	No	0	No Discrimination	No	No	No	Yes	No	No	No	No	1	Some Information	35-49	primaryedu	rural	paid	Male
master only (1)	0.359258	44	No	No	0	No Discrimination	No	No	No	Yes	No	No	No	No	1	Some Information	50-54	primaryedu	urban	paid	Male
master only (1)	0.363258	19	No	No	0	No Discrimination	No	No	Yes	No	No	No	No	No	1	Some Information	50-54	primaryedu	urban	paid	Male
master only (1)	0.372631	2	No	No	0	No Discrimination	No	No	No	Yes	No	No	No	No	1	Some Information	50-54	primaryedu	rural	paid	Male
master only (1)	0.382279	52	No	No	0	No Discrimination	No	No	No	Yes	Yes	No	No	No	2	Some Information	50-54	highedu	urban	paid	Male
master only (1)	0.384213	44	No	No	0	No Discrimination	No	No	Yes	Yes	No	No	No	No	2	Some Information	35-49	seconedu	urban	paid	Male
master only (1)	0.398343	52	No	No	0	No Discrimination	No	No	No	Yes	Yes	No	No	Yes	3	Some Information	35-49	highedu	urban	paid	Male
master only (1)	0.416485	37	No	No	0	No Discrimination	No	No	No	No	No	Yes	No	No	1	Some Information	25-34	seconedu	rural	paid	Male
master only (1)	0.416485	37	No	No	0	No Discrimination	No	No	No	No	No	Yes	No	No	1	Some Information	50-54	primaryedu	rural	paid	Male
master only (1)	0.435814	37	No	No	0	No Discrimination	Yes	Yes	Yes	Yes	Yes	Yes	No	Yes	7	More Information	35-49	highedu	rural	paid	Male
master only (1)	0.436236	37	No	No	0	No Discrimination	No	No	No	Yes	No	No	No	No	1	Some Information	25-34	primaryedu	rural	paid	Male
master only (1)	0.436864	51	No	No	0	No Discrimination	No	No	No	Yes	Yes	No	No	No	2	Some Information	35-49	highedu	rural	paid	Male
master only (1)	0.455258	51	No	No	0	No Discrimination	No	No	No	Yes	No	No	No	No	1	Some Information	35-49	seconedu	rural	paid	Male
master only (1)	0.457258	2	No	No	0	No Discrimination	No	No	No	Yes	No	No	No	No	1	Some Information	25-34	highedu	rural	paid	Male
master only (1)	0.457258	2	No	No	0	No Discrimination	No	No	No	Yes	Yes	No	No	No	2	Some Information	25-34	seconedu	rural	paid	Male
master only (1)	0.491003	66	No	No	0	No Discrimination	No	No	No	Yes	Yes	No	No	No	2	Some Information	35-49	noedu	urban	no paid	Male
master only (1)	0.515264	38	No	No	0	No Discrimination	No	No	Yes	Yes	No	No	No	Yes	3	Some Information	35-49	highedu	urban	paid	Male
master only (1)	0.544764	13	No	No	0	No Discrimination	No	No	No	Yes	No	No	No	No	1	Some Information	35-49	seconedu	urban	paid	Male
master only (1)	0.630012	38	No	No	0	No Discrimination	No	No	No	Yes	No	No	No	No	1	Some Information	35-49	primaryedu	urban	paid	Male
master only (1)	0.630119	5	No	No	0	No Discrimination	No	No	No	Yes	No	No	No	No	1	Some Information	25-34	seconedu	urban	paid	Male
master only (1)	0.632284	38	No	No	0	No Discrimination	No	No	No	Yes	No	No	No	No	1	Some Information	35-49	seconedu	urban	paid	Male
master only (1)	0.685179	52	No	No	0	No Discrimination	Yes	No	No	Yes	Yes	No	No	No	3	Some Information	50-54	seconedu	urban	paid	Male
master only (1)	0.78992	67	No	No	0	No Discrimination	No	No	No	No	Yes	Yes	No	No	2	Some Information	25-34	seconedu	rural	paid	Male
master only (1)	0.78992	67	No	No	0	No Discrimination	No	No	Yes	No	No	No	No	No	1	Some Information	35-49	seconedu	rural	no paid	Male
master only (1)	0.920421	39	No	No	0	No Discrimination	No	No	No	Yes	No	No	No	Yes	2	Some Information	35-49	seconedu	rural	paid	Male
master only (1)	0.963245	21	No	No	0	No Discrimination	Yes	No	No	Yes	No	No	No	No	2	Some Information	25-34	seconedu	urban	paid	Male
master only (1)	0.975196	43	No	No	0	No Discrimination	No	No	No	Yes	No	No	No	No	1	Some Information	35-49	seconedu	rural	paid	Male
master only (1)	1.0022	53	No	No	0	No Discrimination	No	No	No	Yes	No	No	No	No	1	Some Information	35-49	primaryedu	rural	paid	Male
master only (1)	1.03639	26	No	No	0	No Discrimination	No	Yes	Yes	Yes	No	No	No	No	3	Some Information	35-49	highedu	urban	paid	Male
master only (1)	1.04156	4	No	No	0	No Discrimination	No	No	No	No	No	Yes	No	Yes	2	Some Information	25-34	highedu	rural	paid	Male
master only (1)	1.06307	39	No	No	0	No Discrimination	No	No	No	No	No	No	No	No	0	No Information	35-49	seconedu	rural	paid	Male
master only (1)	1.06769	21	No	No	0	No Discrimination	No	No	No	Yes	No	No	No	No	1	Some Information	50-54	seconedu	urban	paid	Male
master only (1)	1.09744	21	No	No	0	No Discrimination	No	Yes	No	Yes	No	No	No	No	2	Some Information	35-49	seconedu	urban	paid	Male
master only (1)	1.17866	53	No	No	0	No Discrimination	No	No	No	Yes	No	No	No	No	1	Some Information	35-49	seconedu	rural	paid	Male
master only (1)	1.21808	20	No	No	0	No Discrimination	No	No	No	Yes	No	No	No	No	1	Some Information	25-34	primaryedu	rural	paid	Male
master only (1)	1.23462	21	No	No	0	No Discrimination	Yes	No	No	Yes	No	No	No	No	2	Some Information	35-49	highedu	urban	paid	Male
master only (1)	1.23637	67	No	No	0	No Discrimination	No	No	No	No	No	No	No	Yes	1	Some Information	25-34	seconedu	rural	no paid	Male
master only (1)	1.25309	21	No	No	0	No Discrimination	No	No	No	Yes	No	No	No	No	1	Some Information	35-49	seconedu	urban	paid	Male
master only (1)	1.28714	8	No	No	0	No Discrimination	No	No	No	Yes	No	No	No	No	1	Some Information	25-34	seconedu	rural	paid	Male
master only (1)	1.37407	30	No	No	0	No Discrimination	No	No	No	Yes	No	No	No	No	1	Some Information	25-34	primaryedu	urban	paid	Male
master only (1)	1.41818	16	No	No	0	No Discrimination	No	No	No	Yes	No	No	No	No	1	Some Information	35-49	seconedu	rural	paid	Male
master only (1)	1.44433	22	No	No	0	No Discrimination	Yes	Yes	Yes	Yes	No	No	No	No	4	More Information	35-49	highedu	urban	paid	Male
master only (1)	1.47948	22	No	No	0	No Discrimination	No	No	No	No	No	No	No	No	0	No Information	35-49	primaryedu	urban	paid	Male
master only (1)	1.52169	28	No	No	0	No Discrimination	No	No	No	Yes	No	No	No	No	1	Some Information	35-49	primaryedu	urban	paid	Male
master only (1)	1.52993	10	No	No	0	No Discrimination	No	No	Yes	No	No	No	No	No	1	Some Information	25-34	seconedu	rural	paid	Male
master only (1)	1.57377	24	No	No	0	No Discrimination	No	No	No	No	No	No	No	No	0	No Information	50-54	primaryedu	urban	paid	Male
master only (1)	1.58151	22	No	No	0	No Discrimination	No	No	No	Yes	Yes	No	No	No	2	Some Information	50-54	highedu	urban	paid	Male
master only (1)	1.58917	30	No	No	0	No Discrimination	Yes	No	No	No	No	No	No	No	1	Some Information	35-49	seconedu	urban	paid	Male
master only (1)	1.60154	28	No	No	0	No Discrimination	No	No	No	Yes	No	No	No	No	1	Some Information	35-49	seconedu	urban	paid	Male
master only (1)	1.60779	22	No	No	0	No Discrimination	No	No	No	Yes	Yes	No	No	No	2	Some Information	25-34	seconedu	urban	paid	Male
master only (1)	1.6119	28	No	No	0	No Discrimination	No	No	Yes	Yes	No	No	No	No	2	Some Information	50-54	primaryedu	urban	paid	Male
master only (1)	1.62551	21	No	No	0	No Discrimination	No	No	No	Yes	No	No	No	No	1	Some Information	25-34	primaryedu	urban	paid	Male
master only (1)	1.76297	22	No	No	0	No Discrimination	No	No	No	Yes	No	Yes	No	No	2	Some Information	35-49	seconedu	urban	paid	Male
master only (1)	1.82329	22	No	No	0	No Discrimination	No	No	No	Yes	No	No	No	No	1	Some Information	15-24	seconedu	urban	paid	Male
master only (1)	1.83378	25	No	No	0	No Discrimination	No	No	No	Yes	No	No	No	No	1	Some Information	15-24	seconedu	rural	paid	Male
master only (1)	1.84902	24	No	No	0	No Discrimination	Yes	No	Yes	Yes	No	No	No	No	3	Some Information	35-49	highedu	urban	paid	Male
master only (1)	1.87701	25	No	No	0	No Discrimination	No	No	No	Yes	No	No	No	No	1	Some Information	35-49	seconedu	rural	paid	Male
master only (1)	1.90032	29	No	No	0	No Discrimination	No	No	No	Yes	No	No	No	No	1	Some Information	35-49	primaryedu	rural	paid	Male
master only (1)	2.12078	25	No	No	0	No Discrimination	No	No	No	Yes	No	No	No	No	1	Some Information	35-49	seconedu	rural	paid	Male
master only (1)	2.12078	25	No	No	0	No Discrimination	Yes	No	Yes	Yes	Yes	No	No	No	4	More Information	15-24	seconedu	rural	paid	Male
master only (1)	2.16949	25	No	No	0	No Discrimination	No	No	No	No	No	No	No	No	0	No Information	50-54	seconedu	rural	paid	Male
master only (1)	2.34988	11	No	No	0	No Discrimination	No	Yes	Yes	Yes	No	No	No	No	3	Some Information	25-34	seconedu	urban	paid	Male
master only (1)	0.132078	59	No	No	0	No Discrimination	No	No	No	No	No	No	No	No	0	No Information	35-49	primaryedu	rural	paid	Male
master only (1)	0.219103	63	No	No	0	No Discrimination	No	No	No	Yes	No	No	No	No	1	Some Information	25-34	seconedu	rural	paid	Male
master only (1)	0.383386	55	No	No	0	No Discrimination	No	No	No	Yes	No	No	No	No	1	Some Information	35-49	primaryedu	rural	paid	Male
master only (1)	0.745159	44	No	No	0	No Discrimination	No	Yes	Yes	Yes	No	No	No	No	3	Some Information	25-34	seconedu	urban	paid	Male
master only (1)	1.0784	8	No	No	0	No Discrimination	Yes	No	Yes	Yes	No	No	No	No	3	Some Information	35-49	seconedu	rural	paid	Male
master only (1)	1.10031	30	No	No	0	No Discrimination	Yes	No	No	No	No	No	No	No	1	Some Information	25-34	highedu	urban	paid	Male
master only (1)	0.470395	9	No	No	0	No Discrimination	No	No	Yes	Yes	No	No	No	No	2	Some Information	50-54	seconedu	urban	paid	Male
master only (1)	1.83325	25	No	No	0	No Discrimination	No	Yes	No	Yes	No	No	No	No	2	Some Information	50-54	primaryedu	rural	paid	Male
master only (1)	2.22121	29	No	No	0	No Discrimination	No	No	No	Yes	No	No	No	No	1	Some Information	35-49	primaryedu	rural	paid	Male
master only (1)	0.272262	2	No	No	0	No Discrimination	No	No	Yes	Yes	No	No	No	No	2	Some Information	35-49	seconedu	rural	paid	Male
master only (1)	0.411648	57	No	No	0	No Discrimination	No	No	No	Yes	No	No	No	No	1	Some Information	25-34	seconedu	rural	paid	Male
master only (1)	0.43468	44	No	No	0	No Discrimination	Yes	No	Yes	Yes	Yes	No	No	No	4	More Information	35-49	seconedu	urban	paid	Male
master only (1)	0.452971	11	No	No	0	No Discrimination	No	No	No	Yes	No	No	No	No	1	Some Information	25-34	primaryedu	urban	paid	Male
master only (1)	1.92662	25	No	No	0	No Discrimination	No	No	No	Yes	No	Yes	No	No	2	Some Information	35-49	highedu	rural	paid	Male
master only (1)	0.948186	3	No	No	0	No Discrimination	No	No	No	Yes	No	No	No	No	1	Some Information	35-49	seconedu	urban	paid	Male
master only (1)	0.127412	58	No	No	0	No Discrimination	No	No	No	Yes	No	No	No	No	1	Some Information	25-34	primaryedu	urban	paid	Male
master only (1)	0.130408	58	No	No	0	No Discrimination	No	No	Yes	Yes	No	No	No	No	2	Some Information	25-34	highedu	urban	paid	Male
master only (1)	0.147185	59	No	No	0	No Discrimination	No	No	No	Yes	No	No	No	No	1	Some Information	35-49	seconedu	rural	paid	Male
master only (1)	0.157439	59	No	No	0	No Discrimination	No	No	No	No	No	No	No	Yes	1	Some Information	35-49	seconedu	rural	paid	Male
master only (1)	0.164321	58	No	No	0	No Discrimination	No	No	No	Yes	No	No	No	No	1	Some Information	25-34	seconedu	urban	paid	Male
master only (1)	0.212965	36	No	No	0	No Discrimination	Yes	No	No	Yes	No	No	No	No	2	Some Information	25-34	seconedu	urban	paid	Male
master only (1)	0.267686	17	No	No	0	No Discrimination	No	No	No	Yes	No	No	No	No	1	Some Information	50-54	seconedu	urban	paid	Male
master only (1)	0.33967	37	No	No	0	No Discrimination	No	Yes	No	No	No	No	No	No	1	Some Information	35-49	primaryedu	rural	paid	Male
master only (1)	0.33967	37	No	No	0	No Discrimination	No	No	No	No	Yes	No	No	No	1	Some Information	35-49	primaryedu	rural	paid	Male
master only (1)	0.359729	57	No	No	0	No Discrimination	No	No	No	No	No	No	No	No	0	No Information	25-34	primaryedu	rural	paid	Male
master only (1)	0.385341	55	No	No	0	No Discrimination	No	No	No	Yes	No	No	No	No	1	Some Information	25-34	primaryedu	rural	paid	Male
master only (1)	0.450479	18	No	No	0	No Discrimination	No	No	No	No	No	No	No	No	0	No Information	15-24	noedu	rural	paid	Male
master only (1)	0.461755	37	No	No	0	No Discrimination	No	No	No	Yes	No	Yes	No	No	2	Some Information	35-49	primaryedu	rural	no paid	Male
master only (1)	0.970649	3	No	No	0	No Discrimination	No	No	No	Yes	No	No	No	No	1	Some Information	35-49	seconedu	urban	paid	Male
master only (1)	1.11694	6	No	No	0	No Discrimination	No	No	No	No	No	No	No	No	0	No Information	35-49	primaryedu	rural	paid	Male
master only (1)	1.21441	33	No	No	0	No Discrimination	No	No	No	No	No	No	No	No	0	No Information	35-49	primaryedu	rural	paid	Male
master only (1)	1.32474	24	No	No	0	No Discrimination	No	No	No	Yes	No	No	No	No	1	Some Information	50-54	seconedu	urban	paid	Male
master only (1)	1.72889	25	No	No	0	No Discrimination	No	No	No	Yes	No	No	No	No	1	Some Information	25-34	primaryedu	rural	paid	Male
master only (1)	2.50602	29	No	No	0	No Discrimination	No	No	No	Yes	No	No	No	No	1	Some Information	35-49	seconedu	rural	paid	Male
master only (1)	0.12798	59	No	No	0	No Discrimination	No	No	Yes	Yes	No	No	No	No	2	Some Information	25-34	highedu	rural	paid	Male
master only (1)	1.38225	16	No	No	0	No Discrimination	No	No	No	Yes	No	No	No	No	1	Some Information	35-49	primaryedu	rural	paid	Male
master only (1)	0.261501	61	No	No	0	No Discrimination	No	No	No	Yes	Yes	No	No	No	2	Some Information	35-49	seconedu	rural	paid	Male
master only (1)	0.155773	59	No	No	0	No Discrimination	No	No	No	Yes	No	No	No	No	1	Some Information	15-24	seconedu	rural	paid	Male
master only (1)	0.369582	44	No	No	0	No Discrimination	Yes	No	Yes	Yes	Yes	Yes	No	No	5	More Information	25-34	highedu	urban	paid	Male
master only (1)	0.427039	18	No	No	0	No Discrimination	No	No	Yes	Yes	Yes	No	No	No	3	Some Information	50-54	seconedu	rural	paid	Male
master only (1)	0.450479	18	No	No	0	No Discrimination	No	No	Yes	Yes	No	No	No	No	2	Some Information	35-49	primaryedu	rural	paid	Male
master only (1)	1.03719	7	No	No	0	No Discrimination	No	No	Yes	Yes	No	No	No	No	2	Some Information	35-49	seconedu	urban	paid	Male
master only (1)	1.2506	33	No	No	0	No Discrimination	No	No	No	Yes	No	No	No	No	1	Some Information	50-54	primaryedu	rural	paid	Male
master only (1)	1.52478	28	No	No	0	No Discrimination	No	No	No	Yes	No	No	No	No	1	Some Information	50-54	seconedu	urban	paid	Male
master only (1)	1.52478	28	No	No	0	No Discrimination	No	No	No	Yes	No	No	No	No	1	Some Information	35-49	primaryedu	urban	paid	Male
master only (1)	1.76736	28	No	No	0	No Discrimination	No	No	No	Yes	No	No	No	No	1	Some Information	35-49	primaryedu	urban	paid	Male
master only (1)	1.76736	28	No	No	0	No Discrimination	No	No	No	No	No	No	No	No	0	No Information	50-54	primaryedu	urban	paid	Male
master only (1)	1.83858	28	No	No	0	No Discrimination	No	No	No	Yes	No	No	No	No	1	Some Information	50-54	primaryedu	urban	paid	Male
master only (1)	2.18384	29	No	No	0	No Discrimination	No	No	No	Yes	No	No	No	No	1	Some Information	35-49	seconedu	rural	paid	Male
master only (1)	2.18384	29	No	No	0	No Discrimination	No	No	No	Yes	No	No	No	No	1	Some Information	35-49	primaryedu	rural	paid	Male
master only (1)	0.416485	37	No	No	0	No Discrimination	No	No	No	Yes	No	No	No	No	1	Some Information	35-49	seconedu	rural	paid	Male
master only (1)	1.44792	7	No	No	0	No Discrimination	Yes	No	No	No	No	No	No	No	1	Some Information	25-34	seconedu	urban	paid	Male
master only (1)	0.107467	59	No	No	0	No Discrimination	No	No	No	No	No	No	No	No	0	No Information	25-34	noedu	rural	no paid	Male
master only (1)	0.146163	59	No	No	0	No Discrimination	No	No	No	No	No	No	No	No	0	No Information	35-49	primaryedu	rural	paid	Male
master only (1)	0.275853	54	No	No	0	No Discrimination	No	No	No	Yes	No	No	No	No	1	Some Information	35-49	primaryedu	urban	paid	Male
master only (1)	1.89031	29	No	No	0	No Discrimination	No	No	No	Yes	Yes	No	No	No	2	Some Information	35-49	seconedu	rural	paid	Male
master only (1)	1.89031	29	No	No	0	No Discrimination	No	No	No	No	No	No	No	No	0	No Information	15-24	primaryedu	rural	paid	Male
master only (1)	0.130408	58	No	No	0	No Discrimination	No	No	No	Yes	No	No	No	No	1	Some Information	35-49	seconedu	urban	paid	Male
master only (1)	0.157439	59	No	No	0	No Discrimination	No	No	No	Yes	No	No	No	No	1	Some Information	25-34	primaryedu	rural	paid	Male
master only (1)	0.157439	59	No	No	0	No Discrimination	No	No	No	Yes	No	No	No	No	1	Some Information	50-54	primaryedu	rural	paid	Male
master only (1)	0.207059	56	No	No	0	No Discrimination	No	Yes	No	Yes	No	No	No	No	2	Some Information	35-49	seconedu	urban	paid	Male
master only (1)	0.263634	36	No	No	0	No Discrimination	No	No	No	Yes	Yes	No	No	No	2	Some Information	25-34	seconedu	urban	paid	Male
master only (1)	0.446238	2	No	No	0	No Discrimination	No	No	No	Yes	No	No	No	No	1	Some Information	35-49	primaryedu	rural	paid	Male
master only (1)	0.469597	51	No	No	0	No Discrimination	No	No	No	No	No	No	No	No	0	No Information	35-49	seconedu	rural	paid	Male
master only (1)	1.02892	10	No	No	0	No Discrimination	No	No	No	Yes	No	No	No	No	1	Some Information	25-34	primaryedu	rural	paid	Male
master only (1)	1.56021	28	No	No	0	No Discrimination	No	No	No	Yes	No	No	No	No	1	Some Information	50-54	seconedu	urban	paid	Male
master only (1)	1.72721	28	No	No	0	No Discrimination	No	No	No	No	No	No	No	No	0	No Information	35-49	primaryedu	urban	paid	Male
master only (1)	0.093749	58	No	No	0	No Discrimination	No	No	Yes	Yes	No	No	No	No	2	Some Information	35-49	seconedu	urban	paid	Male
master only (1)	0.323612	65	No	No	0	No Discrimination	No	No	No	No	No	No	No	No	0	No Information	50-54	primaryedu	rural	paid	Male
master only (1)	0.344582	1	No	No	0	No Discrimination	No	No	Yes	Yes	Yes	No	No	No	3	Some Information	35-49	seconedu	urban	paid	Male
master only (1)	0.356925	44	No	No	0	No Discrimination	No	No	No	No	Yes	No	No	No	1	Some Information	35-49	seconedu	urban	paid	Male
master only (1)	0.376448	55	No	No	0	No Discrimination	No	No	No	Yes	No	No	No	No	1	Some Information	35-49	primaryedu	rural	paid	Male
master only (1)	0.387369	37	No	No	0	No Discrimination	No	No	No	No	No	Yes	No	No	1	Some Information	50-54	primaryedu	rural	paid	Male
master only (1)	0.439245	50	No	No	0	No Discrimination	No	No	No	Yes	No	No	No	No	1	Some Information	25-34	highedu	urban	paid	Male
master only (1)	0.514908	44	No	No	0	No Discrimination	No	No	No	Yes	No	No	No	No	1	Some Information	35-49	primaryedu	urban	paid	Male
master only (1)	0.515534	67	No	No	0	No Discrimination	No	No	No	No	No	Yes	No	No	1	Some Information	35-49	noedu	rural	paid	Male
master only (1)	0.55915	34	No	No	0	No Discrimination	No	Yes	No	Yes	No	No	No	No	2	Some Information	35-49	seconedu	urban	paid	Male
master only (1)	0.630012	38	No	No	0	No Discrimination	No	No	No	No	No	No	No	No	0	No Information	50-54	seconedu	urban	paid	Male
master only (1)	0.651906	38	No	No	0	No Discrimination	Yes	No	No	Yes	No	No	No	No	2	Some Information	35-49	seconedu	urban	paid	Male
master only (1)	0.712875	39	No	No	0	No Discrimination	No	No	No	Yes	No	No	No	No	1	Some Information	35-49	seconedu	rural	paid	Male
master only (1)	0.72134	52	No	No	0	No Discrimination	No	Yes	No	Yes	No	No	No	No	2	Some Information	50-54	primaryedu	urban	paid	Male
master only (1)	0.789586	45	No	No	0	No Discrimination	No	No	No	Yes	No	No	No	No	1	Some Information	25-34	seconedu	rural	paid	Male
master only (1)	0.864927	26	No	No	0	No Discrimination	No	No	Yes	Yes	No	No	No	No	2	Some Information	50-54	seconedu	urban	paid	Male
master only (1)	1.00777	39	No	No	0	No Discrimination	No	No	No	No	No	No	No	No	0	No Information	25-34	primaryedu	rural	paid	Male
master only (1)	1.00777	39	No	No	0	No Discrimination	No	No	No	No	No	No	No	No	0	No Information	35-49	seconedu	rural	paid	Male
master only (1)	1.00777	39	No	No	0	No Discrimination	No	No	No	No	No	No	No	No	0	No Information	50-54	seconedu	rural	paid	Male
master only (1)	1.12031	16	No	No	0	No Discrimination	No	No	No	No	Yes	No	No	No	1	Some Information	35-49	seconedu	rural	paid	Male
master only (1)	1.23474	6	No	No	0	No Discrimination	No	No	Yes	Yes	Yes	No	No	No	3	Some Information	50-54	primaryedu	rural	paid	Male
master only (1)	1.23805	21	No	No	0	No Discrimination	Yes	No	Yes	Yes	No	No	No	No	3	Some Information	25-34	seconedu	urban	paid	Male
master only (1)	1.24283	16	No	No	0	No Discrimination	No	No	No	Yes	No	No	No	No	1	Some Information	35-49	primaryedu	rural	paid	Male
master only (1)	1.40892	22	No	No	0	No Discrimination	No	No	No	Yes	No	No	No	No	1	Some Information	50-54	primaryedu	urban	paid	Male
master only (1)	1.45614	24	No	No	0	No Discrimination	No	Yes	Yes	Yes	No	No	No	No	3	Some Information	35-49	seconedu	urban	paid	Male
master only (1)	1.48234	22	No	No	0	No Discrimination	No	No	No	Yes	No	No	No	No	1	Some Information	35-49	highedu	urban	paid	Male
master only (1)	1.52152	24	No	No	0	No Discrimination	No	No	No	Yes	No	Yes	No	No	2	Some Information	35-49	seconedu	urban	paid	Male
master only (1)	1.52152	24	No	No	0	No Discrimination	No	No	No	No	No	No	No	No	0	No Information	35-49	primaryedu	urban	paid	Male
master only (1)	1.52169	28	No	No	0	No Discrimination	No	No	No	Yes	No	No	No	No	1	Some Information	35-49	seconedu	urban	paid	Male
master only (1)	1.56238	22	No	No	0	No Discrimination	Yes	No	No	Yes	No	No	No	No	2	Some Information	35-49	seconedu	urban	paid	Male
master only (1)	1.61744	28	No	No	0	No Discrimination	Yes	Yes	Yes	Yes	Yes	No	No	Yes	6	More Information	35-49	highedu	urban	paid	Male
master only (1)	1.61744	28	No	No	0	No Discrimination	Yes	Yes	Yes	Yes	No	No	No	Yes	5	More Information	25-34	highedu	urban	paid	Male
master only (1)	1.79757	27	No	No	0	No Discrimination	No	Yes	No	Yes	No	No	No	No	2	Some Information	35-49	primaryedu	rural	paid	Male
master only (1)	1.82512	24	No	No	0	No Discrimination	No	No	No	No	No	No	No	No	0	No Information	25-34	seconedu	urban	paid	Male
master only (1)	2.04421	29	No	No	0	No Discrimination	No	Yes	No	Yes	No	No	No	No	2	Some Information	25-34	seconedu	rural	paid	Male
master only (1)	2.07576	25	No	No	0	No Discrimination	No	No	Yes	Yes	Yes	Yes	No	Yes	5	More Information	50-54	highedu	rural	paid	Male
master only (1)	2.27777	29	No	No	0	No Discrimination	No	No	No	Yes	No	No	No	No	1	Some Information	35-49	seconedu	rural	paid	Male
master only (1)	2.64723	23	No	No	0	No Discrimination	Yes	Yes	Yes	Yes	No	No	No	No	4	More Information	35-49	seconedu	rural	paid	Male
master only (1)	0.842107	11	No	No	0	No Discrimination	No	Yes	Yes	Yes	No	No	No	No	3	Some Information	35-49	seconedu	urban	paid	Male
master only (1)	1.0464	43	No	No	0	No Discrimination	No	No	No	Yes	No	No	No	No	1	Some Information	25-34	seconedu	rural	paid	Male
master only (1)	1.43674	24	No	No	0	No Discrimination	No	No	No	Yes	No	Yes	No	No	2	Some Information	35-49	primaryedu	urban	paid	Male
master only (1)	1.67012	32	No	No	0	No Discrimination	No	No	Yes	No	No	Yes	No	No	2	Some Information	35-49	seconedu	urban	paid	Male
master only (1)	1.72692	22	No	No	0	No Discrimination	No	No	Yes	Yes	Yes	No	No	No	3	Some Information	25-34	seconedu	urban	paid	Male
master only (1)	2.16036	29	No	No	0	No Discrimination	No	No	No	Yes	Yes	No	No	No	2	Some Information	35-49	seconedu	rural	paid	Male
master only (1)	0.143273	46	No	No	0	No Discrimination	No	No	No	Yes	Yes	No	No	No	2	Some Information	35-49	seconedu	urban	paid	Male
master only (1)	0.260846	55	No	No	0	No Discrimination	No	No	No	Yes	No	No	No	No	1	Some Information	35-49	seconedu	rural	paid	Male
master only (1)	0.323936	13	No	No	0	No Discrimination	No	No	No	No	Yes	No	No	No	1	Some Information	15-24	seconedu	urban	paid	Male
master only (1)	0.344269	19	No	No	0	No Discrimination	No	No	No	Yes	No	No	No	No	1	Some Information	35-49	seconedu	urban	paid	Male
master only (1)	1.10068	39	No	No	0	No Discrimination	No	No	No	No	No	No	No	No	0	No Information	15-24	seconedu	rural	paid	Male
master only (1)	1.10068	39	No	No	0	No Discrimination	No	No	No	No	No	No	No	No	0	No Information	35-49	primaryedu	rural	paid	Male
master only (1)	1.14087	53	No	No	0	No Discrimination	No	No	Yes	Yes	Yes	No	No	No	3	Some Information	25-34	seconedu	rural	paid	Male
master only (1)	1.33716	22	No	No	0	No Discrimination	Yes	Yes	Yes	Yes	No	No	No	No	4	More Information	35-49	seconedu	urban	paid	Male
master only (1)	1.4132	16	No	No	0	No Discrimination	No	No	No	Yes	No	No	No	No	1	Some Information	35-49	seconedu	rural	paid	Male
master only (1)	1.49003	16	No	No	0	No Discrimination	No	No	No	Yes	No	No	No	No	1	Some Information	25-34	primaryedu	rural	paid	Male
master only (1)	1.88251	25	No	No	0	No Discrimination	No	No	No	Yes	No	No	No	No	1	Some Information	35-49	seconedu	rural	paid	Male
master only (1)	1.8937	25	No	No	0	No Discrimination	No	No	No	Yes	No	No	No	No	1	Some Information	50-54	primaryedu	rural	paid	Male
master only (1)	2.06434	29	No	No	0	No Discrimination	No	Yes	No	Yes	No	No	No	No	2	Some Information	35-49	primaryedu	rural	paid	Male
master only (1)	2.34704	22	No	No	0	No Discrimination	No	No	No	No	No	No	No	No	0	No Information	15-24	seconedu	urban	paid	Male
master only (1)	0.140116	47	No	No	0	No Discrimination	Yes	No	No	Yes	No	No	No	No	2	Some Information	35-49	highedu	rural	paid	Male
master only (1)	0.362336	2	No	No	0	No Discrimination	No	No	No	Yes	Yes	No	No	No	2	Some Information	25-34	seconedu	rural	paid	Male
master only (1)	0.507458	5	No	No	0	No Discrimination	No	No	No	Yes	No	No	No	No	1	Some Information	35-49	seconedu	urban	no paid	Male
master only (1)	0.57246	44	No	No	0	No Discrimination	No	Yes	No	Yes	No	No	No	No	2	Some Information	35-49	seconedu	urban	paid	Male
master only (1)	0.630012	38	No	No	0	No Discrimination	Yes	No	No	Yes	No	No	No	No	2	Some Information	35-49	highedu	urban	paid	Male
master only (1)	0.693315	52	No	No	0	No Discrimination	No	No	No	Yes	No	No	No	No	1	Some Information	25-34	primaryedu	urban	paid	Male
master only (1)	0.712875	39	No	No	0	No Discrimination	No	No	No	Yes	No	No	No	No	1	Some Information	50-54	highedu	rural	paid	Male
master only (1)	0.715699	21	No	No	0	No Discrimination	No	No	No	Yes	No	No	No	No	1	Some Information	35-49	seconedu	urban	paid	Male
master only (1)	0.863637	39	No	No	0	No Discrimination	No	No	No	No	No	No	No	No	0	No Information	25-34	seconedu	rural	paid	Male
master only (1)	0.900232	39	No	No	0	No Discrimination	No	No	No	No	No	No	No	No	0	No Information	35-49	primaryedu	rural	paid	Male
master only (1)	0.903217	21	No	No	0	No Discrimination	No	No	No	Yes	No	No	No	No	1	Some Information	50-54	highedu	urban	paid	Male
master only (1)	0.940737	3	No	No	0	No Discrimination	No	No	No	Yes	No	No	No	No	1	Some Information	25-34	seconedu	urban	paid	Male
master only (1)	1.01255	28	No	No	0	No Discrimination	Yes	No	No	Yes	No	No	No	Yes	3	Some Information	25-34	seconedu	urban	paid	Male
master only (1)	1.05645	39	No	No	0	No Discrimination	No	No	No	Yes	No	No	No	No	1	Some Information	25-34	seconedu	rural	paid	Male
master only (1)	1.33257	22	No	No	0	No Discrimination	No	No	Yes	Yes	No	No	No	Yes	3	Some Information	50-54	seconedu	urban	paid	Male
master only (1)	1.42072	16	No	No	0	No Discrimination	No	No	No	Yes	No	No	No	No	1	Some Information	35-49	seconedu	rural	paid	Male
master only (1)	1.46589	24	No	No	0	No Discrimination	Yes	No	Yes	Yes	No	No	No	No	3	Some Information	25-34	highedu	urban	paid	Male
master only (1)	1.50829	24	No	No	0	No Discrimination	No	No	No	Yes	No	No	No	No	1	Some Information	35-49	primaryedu	urban	paid	Male
master only (1)	1.52662	21	No	No	0	No Discrimination	No	No	No	Yes	No	No	No	No	1	Some Information	35-49	highedu	urban	paid	Male
master only (1)	1.86853	25	No	No	0	No Discrimination	Yes	No	No	Yes	No	No	No	No	2	Some Information	25-34	seconedu	rural	paid	Male
master only (1)	0.843256	21	No	No	0	No Discrimination	Yes	No	Yes	Yes	No	No	No	No	3	Some Information	50-54	primaryedu	urban	paid	Male
master only (1)	0.376448	55	No	No	0	No Discrimination	No	No	No	No	No	No	No	No	0	No Information	35-49	primaryedu	rural	paid	Male
master only (1)	2.93589	23	No	No	0	No Discrimination	No	No	No	Yes	No	No	No	Yes	2	Some Information	35-49	seconedu	rural	paid	Male
master only (1)	2.93589	23	No	No	0	No Discrimination	No	No	Yes	Yes	No	No	No	No	2	Some Information	35-49	seconedu	rural	paid	Male
master only (1)	1.00819	6	No	No	0	No Discrimination	No	Yes	No	Yes	Yes	Yes	No	No	4	More Information	35-49	seconedu	rural	paid	Male
master only (1)	0.122544	58	No	No	0	No Discrimination	No	No	No	Yes	No	Yes	No	No	2	Some Information	50-54	seconedu	urban	paid	Male
master only (1)	0.136074	59	No	No	0	No Discrimination	No	No	No	Yes	Yes	No	No	No	2	Some Information	35-49	seconedu	rural	paid	Male
master only (1)	0.138897	46	No	No	0	No Discrimination	No	No	No	Yes	No	No	No	No	1	Some Information	35-49	seconedu	urban	paid	Male
master only (1)	0.138897	46	No	No	0	No Discrimination	No	No	No	Yes	No	No	No	No	1	Some Information	35-49	seconedu	urban	paid	Male
master only (1)	0.143215	59	No	No	0	No Discrimination	No	No	No	No	No	No	No	No	0	No Information	50-54	primaryedu	rural	paid	Male
master only (1)	0.155757	47	No	No	0	No Discrimination	No	No	No	Yes	No	No	No	No	1	Some Information	35-49	seconedu	rural	paid	Male
master only (1)	0.1777	17	No	No	0	No Discrimination	No	Yes	No	Yes	No	No	No	No	2	Some Information	35-49	seconedu	urban	paid	Male
master only (1)	0.207059	56	No	No	0	No Discrimination	No	No	No	Yes	No	No	No	No	1	Some Information	35-49	highedu	urban	paid	Male
master only (1)	0.21198	46	No	No	0	No Discrimination	No	No	No	No	No	Yes	No	No	1	Some Information	35-49	primaryedu	urban	paid	Male
master only (1)	0.232201	1	No	No	0	No Discrimination	No	No	No	Yes	No	No	No	No	1	Some Information	35-49	seconedu	urban	paid	Male
master only (1)	0.237856	17	No	No	0	No Discrimination	No	No	No	Yes	No	No	No	No	1	Some Information	35-49	seconedu	urban	paid	Male
master only (1)	0.280561	55	No	No	0	No Discrimination	No	No	Yes	Yes	No	No	No	No	2	Some Information	25-34	seconedu	rural	paid	Male
master only (1)	0.289182	19	No	No	0	No Discrimination	Yes	No	No	Yes	No	No	No	No	2	Some Information	25-34	seconedu	urban	paid	Male
master only (1)	0.31367	1	No	No	0	No Discrimination	No	No	No	Yes	No	No	No	No	1	Some Information	35-49	seconedu	urban	paid	Male
master only (1)	0.341217	18	No	No	0	No Discrimination	No	No	Yes	Yes	No	No	No	No	2	Some Information	35-49	seconedu	rural	paid	Male
master only (1)	0.351461	37	No	No	0	No Discrimination	No	No	Yes	No	No	No	No	Yes	2	Some Information	25-34	highedu	rural	paid	Male
master only (1)	0.407664	37	No	No	0	No Discrimination	No	No	No	Yes	Yes	No	No	No	2	Some Information	25-34	primaryedu	rural	paid	Male
master only (1)	0.436864	51	No	No	0	No Discrimination	No	No	No	Yes	No	No	No	No	1	Some Information	50-54	primaryedu	rural	paid	Male
master only (1)	0.447492	1	No	No	0	No Discrimination	No	No	No	Yes	No	No	No	No	1	Some Information	35-49	seconedu	urban	paid	Male
master only (1)	0.477162	50	No	No	0	No Discrimination	Yes	No	No	Yes	No	No	No	No	2	Some Information	35-49	seconedu	urban	paid	Male
master only (1)	0.587725	15	No	No	0	No Discrimination	No	No	No	No	Yes	Yes	No	No	2	Some Information	35-49	seconedu	urban	paid	Male
master only (1)	0.598979	39	No	No	0	No Discrimination	No	No	No	Yes	No	No	No	No	1	Some Information	35-49	seconedu	rural	paid	Male
master only (1)	0.651906	38	No	No	0	No Discrimination	No	No	No	No	No	No	No	No	0	No Information	35-49	seconedu	urban	paid	Male
master only (1)	0.693315	52	No	No	0	No Discrimination	No	No	Yes	Yes	No	No	No	No	2	Some Information	35-49	seconedu	urban	paid	Male
master only (1)	0.74315	38	No	No	0	No Discrimination	No	No	No	No	No	No	No	No	0	No Information	25-34	seconedu	urban	paid	Male
master only (1)	0.74315	38	No	No	0	No Discrimination	No	No	No	No	No	No	No	No	0	No Information	50-54	seconedu	urban	paid	Male
master only (1)	0.797314	30	No	No	0	No Discrimination	Yes	No	No	Yes	No	No	No	No	2	Some Information	35-49	seconedu	urban	paid	Male
master only (1)	0.803115	66	No	No	0	No Discrimination	Yes	Yes	No	Yes	No	No	No	No	3	Some Information	25-34	seconedu	urban	paid	Male
master only (1)	0.816048	15	No	No	0	No Discrimination	No	No	No	Yes	Yes	No	No	No	2	Some Information	35-49	seconedu	urban	paid	Male
master only (1)	0.880007	43	No	No	0	No Discrimination	No	No	No	Yes	No	No	No	No	1	Some Information	35-49	primaryedu	rural	paid	Male
master only (1)	0.929459	32	No	No	0	No Discrimination	No	No	No	No	Yes	Yes	No	No	2	Some Information	35-49	seconedu	urban	paid	Male
master only (1)	0.940793	26	No	No	0	No Discrimination	Yes	No	No	Yes	No	No	No	No	2	Some Information	25-34	highedu	urban	paid	Male
master only (1)	0.952284	30	No	No	0	No Discrimination	No	No	No	Yes	No	No	No	No	1	Some Information	35-49	seconedu	urban	no paid	Male
master only (1)	0.998567	30	No	No	0	No Discrimination	No	No	Yes	Yes	No	No	No	No	2	Some Information	35-49	highedu	urban	paid	Male
master only (1)	1.0022	53	No	No	0	No Discrimination	No	No	No	No	No	No	No	No	0	No Information	50-54	primaryedu	rural	paid	Male
master only (1)	1.01205	16	No	No	0	No Discrimination	No	No	No	Yes	No	No	No	No	1	Some Information	35-49	primaryedu	rural	paid	Male
master only (1)	1.05821	30	No	No	0	No Discrimination	No	No	Yes	Yes	No	No	No	No	2	Some Information	35-49	seconedu	urban	paid	Male
master only (1)	1.06648	53	No	No	0	No Discrimination	No	No	No	Yes	No	No	No	No	1	Some Information	25-34	primaryedu	rural	paid	Male
master only (1)	1.07154	4	No	No	0	No Discrimination	No	No	Yes	Yes	No	No	No	No	2	Some Information	25-34	seconedu	rural	paid	Male
master only (1)	1.07591	21	No	No	0	No Discrimination	Yes	No	No	Yes	No	No	No	No	2	Some Information	35-49	seconedu	urban	paid	Male
master only (1)	1.12031	16	No	No	0	No Discrimination	Yes	No	No	No	No	No	No	No	1	Some Information	35-49	seconedu	rural	paid	Male
master only (1)	1.12454	4	No	No	0	No Discrimination	No	No	No	Yes	No	No	No	No	1	Some Information	35-49	seconedu	rural	paid	Male
master only (1)	1.12454	4	No	No	0	No Discrimination	No	No	No	Yes	No	No	No	Yes	2	Some Information	35-49	seconedu	rural	paid	Male
master only (1)	1.20819	21	No	No	0	No Discrimination	No	No	No	Yes	No	No	No	No	1	Some Information	35-49	seconedu	urban	paid	Male
master only (1)	1.20841	39	No	No	0	No Discrimination	No	No	No	No	No	Yes	No	No	1	Some Information	25-34	highedu	rural	paid	Male
master only (1)	1.24977	4	No	No	0	No Discrimination	No	No	Yes	Yes	No	No	No	No	2	Some Information	35-49	seconedu	rural	paid	Male
master only (1)	1.29217	21	No	No	0	No Discrimination	Yes	No	No	Yes	No	No	No	No	2	Some Information	25-34	highedu	urban	paid	Male
master only (1)	1.29455	67	No	No	0	No Discrimination	No	No	No	No	Yes	No	No	No	1	Some Information	35-49	noedu	rural	no paid	Male
master only (1)	1.31336	33	No	No	0	No Discrimination	No	Yes	Yes	Yes	No	Yes	No	No	4	More Information	35-49	highedu	rural	paid	Male
master only (1)	1.33716	22	No	No	0	No Discrimination	No	No	Yes	Yes	Yes	No	No	Yes	4	More Information	50-54	highedu	urban	paid	Male
master only (1)	1.37048	26	No	No	0	No Discrimination	No	No	No	No	No	No	No	No	0	No Information	35-49	seconedu	urban	paid	Male
master only (1)	1.38225	16	No	No	0	No Discrimination	No	No	No	Yes	No	No	No	No	1	Some Information	25-34	seconedu	rural	paid	Male
master only (1)	1.38988	22	No	No	0	No Discrimination	No	No	Yes	Yes	No	No	No	No	2	Some Information	35-49	seconedu	urban	paid	Male
master only (1)	1.39926	24	No	No	0	No Discrimination	No	No	Yes	Yes	No	Yes	Yes	No	4	More Information	50-54	seconedu	urban	paid	Male
master only (1)	1.40552	22	No	No	0	No Discrimination	Yes	No	Yes	Yes	No	No	No	No	3	Some Information	25-34	primaryedu	urban	paid	Male
master only (1)	1.40994	22	No	No	0	No Discrimination	Yes	No	No	No	No	Yes	No	No	2	Some Information	35-49	highedu	urban	paid	Male
master only (1)	1.4317	21	No	No	0	No Discrimination	No	No	No	No	No	No	No	No	0	No Information	35-49	primaryedu	urban	paid	Male
master only (1)	1.51123	22	No	No	0	No Discrimination	No	No	No	Yes	Yes	No	No	No	2	Some Information	50-54	highedu	urban	paid	Male
master only (1)	1.51714	24	No	No	0	No Discrimination	Yes	No	Yes	Yes	No	Yes	No	Yes	5	More Information	35-49	highedu	urban	paid	Male
master only (1)	1.53133	28	No	No	0	No Discrimination	No	No	No	Yes	No	No	No	No	1	Some Information	50-54	seconedu	urban	paid	Male
master only (1)	1.56281	24	No	No	0	No Discrimination	No	No	No	Yes	No	No	No	No	1	Some Information	35-49	seconedu	urban	paid	Male
master only (1)	1.56841	22	No	No	0	No Discrimination	No	No	Yes	Yes	No	No	No	No	2	Some Information	35-49	seconedu	urban	paid	Male
master only (1)	1.57699	28	No	No	0	No Discrimination	No	No	No	Yes	No	No	No	No	1	Some Information	15-24	seconedu	urban	paid	Male
master only (1)	1.69682	22	No	No	0	No Discrimination	No	Yes	Yes	Yes	No	No	No	No	3	Some Information	35-49	seconedu	urban	paid	Male
master only (1)	1.72269	22	No	No	0	No Discrimination	No	No	No	Yes	No	No	No	No	1	Some Information	35-49	seconedu	urban	paid	Male
master only (1)	1.75119	21	No	No	0	No Discrimination	No	No	Yes	Yes	No	No	No	No	2	Some Information	50-54	seconedu	urban	paid	Male
master only (1)	1.87701	25	No	No	0	No Discrimination	No	No	No	No	No	No	No	No	0	No Information	35-49	primaryedu	rural	paid	Male
master only (1)	1.88995	25	No	No	0	No Discrimination	Yes	No	Yes	Yes	No	Yes	No	No	4	More Information	35-49	seconedu	rural	paid	Male
master only (1)	2.03857	25	No	No	0	No Discrimination	No	No	No	Yes	No	No	No	No	1	Some Information	50-54	seconedu	rural	paid	Male
master only (1)	2.05083	25	No	No	0	No Discrimination	No	No	No	No	No	No	No	No	0	No Information	35-49	primaryedu	rural	paid	Male
master only (1)	2.05083	25	No	No	0	No Discrimination	No	No	Yes	Yes	No	No	No	No	2	Some Information	50-54	highedu	rural	paid	Male
master only (1)	2.10197	29	No	No	0	No Discrimination	No	No	No	Yes	No	No	No	No	1	Some Information	35-49	seconedu	rural	no paid	Male
master only (1)	2.10197	29	No	No	0	No Discrimination	No	No	No	Yes	No	No	No	No	1	Some Information	35-49	seconedu	rural	paid	Male
master only (1)	2.10834	25	No	No	0	No Discrimination	No	Yes	No	Yes	No	No	No	No	2	Some Information	35-49	primaryedu	rural	paid	Male
master only (1)	2.32675	23	No	No	0	No Discrimination	Yes	No	Yes	Yes	No	No	No	No	3	Some Information	50-54	highedu	rural	paid	Male
master only (1)	2.34759	29	No	No	0	No Discrimination	No	No	No	Yes	No	No	No	No	1	Some Information	35-49	seconedu	rural	paid	Male
master only (1)	2.39636	29	No	No	0	No Discrimination	No	No	No	Yes	No	No	No	No	1	Some Information	35-49	primaryedu	rural	paid	Male
master only (1)	2.54922	29	No	No	0	No Discrimination	No	No	Yes	No	No	No	No	No	1	Some Information	35-49	primaryedu	rural	paid	Male
master only (1)	2.58972	23	No	No	0	No Discrimination	No	No	No	Yes	No	No	No	No	1	Some Information	35-49	primaryedu	rural	paid	Male
master only (1)	3.76648	28	No	No	0	No Discrimination	Yes	No	No	Yes	No	No	No	No	2	Some Information	25-34	highedu	urban	paid	Male
master only (1)	3.76648	28	No	No	0	No Discrimination	No	No	Yes	Yes	No	No	No	No	2	Some Information	35-49	seconedu	urban	paid	Male
master only (1)	0.132904	63	No	No	0	No Discrimination	No	Yes	Yes	Yes	No	Yes	No	No	4	More Information	35-49	highedu	rural	paid	Male
master only (1)	0.298311	56	No	No	0	No Discrimination	No	Yes	Yes	Yes	No	No	No	No	3	Some Information	35-49	seconedu	urban	paid	Male
master only (1)	0.68777	38	No	No	0	No Discrimination	Yes	No	Yes	Yes	No	No	No	No	3	Some Information	25-34	seconedu	urban	paid	Male
master only (1)	0.838532	3	No	No	0	No Discrimination	No	Yes	No	Yes	No	No	No	No	2	Some Information	35-49	seconedu	urban	paid	Male
master only (1)	0.927538	43	No	No	0	No Discrimination	No	No	No	Yes	No	No	No	No	1	Some Information	25-34	primaryedu	rural	paid	Male
master only (1)	0.97741	21	No	No	0	No Discrimination	Yes	No	Yes	Yes	No	No	No	No	3	Some Information	35-49	highedu	urban	paid	Male
master only (1)	0.995297	39	No	No	0	No Discrimination	No	No	No	No	No	No	No	No	0	No Information	35-49	primaryedu	rural	paid	Male
master only (1)	1.2952	28	No	No	0	No Discrimination	No	No	No	Yes	No	No	No	No	1	Some Information	35-49	highedu	urban	paid	Male
master only (1)	1.4317	21	No	No	0	No Discrimination	No	No	No	Yes	No	No	Yes	No	2	Some Information	35-49	seconedu	urban	paid	Male
master only (1)	1.56282	22	No	No	0	No Discrimination	No	No	No	Yes	No	No	No	No	1	Some Information	35-49	primaryedu	urban	paid	Male
master only (1)	1.6119	28	No	No	0	No Discrimination	Yes	No	Yes	Yes	No	No	No	No	3	Some Information	35-49	seconedu	urban	paid	Male
master only (1)	1.6219	22	No	No	0	No Discrimination	No	Yes	Yes	Yes	No	No	No	No	3	Some Information	25-34	seconedu	urban	paid	Male
master only (1)	1.79606	28	No	No	0	No Discrimination	No	No	No	No	Yes	No	No	No	1	Some Information	35-49	seconedu	urban	no paid	Male
master only (1)	0.107467	59	No	No	0	No Discrimination	No	No	No	Yes	No	No	No	No	1	Some Information	35-49	primaryedu	rural	paid	Male
master only (1)	0.134595	59	No	No	0	No Discrimination	No	No	No	Yes	No	No	No	No	1	Some Information	35-49	highedu	rural	paid	Male
master only (1)	0.870147	26	No	No	0	No Discrimination	No	No	Yes	Yes	No	No	No	No	2	Some Information	35-49	highedu	urban	paid	Male
master only (1)	1.37555	22	No	No	0	No Discrimination	No	No	No	Yes	No	No	No	No	1	Some Information	35-49	primaryedu	urban	paid	Male
master only (1)	0.075573	59	No	No	0	No Discrimination	No	No	No	Yes	No	No	No	No	1	Some Information	25-34	seconedu	rural	paid	Male
master only (1)	0.10495	60	No	No	0	No Discrimination	No	No	Yes	Yes	No	No	No	No	2	Some Information	35-49	seconedu	urban	paid	Male
master only (1)	0.116706	47	No	No	0	No Discrimination	Yes	No	No	Yes	No	No	No	No	2	Some Information	35-49	seconedu	rural	paid	Male
master only (1)	0.122544	58	No	No	0	No Discrimination	No	No	No	Yes	No	Yes	No	No	2	Some Information	50-54	seconedu	urban	paid	Male
master only (1)	0.140019	46	No	No	0	No Discrimination	Yes	No	No	Yes	No	No	No	No	2	Some Information	35-49	seconedu	urban	paid	Male
master only (1)	0.143273	46	No	No	0	No Discrimination	Yes	No	Yes	Yes	No	No	No	No	3	Some Information	25-34	highedu	urban	paid	Male
master only (1)	0.150624	46	No	No	0	No Discrimination	No	No	Yes	Yes	No	No	No	No	2	Some Information	35-49	seconedu	urban	paid	Male
master only (1)	0.150801	17	No	No	0	No Discrimination	Yes	Yes	Yes	Yes	Yes	No	No	No	5	More Information	35-49	seconedu	urban	no paid	Male
master only (1)	0.152082	62	No	No	0	No Discrimination	No	No	No	Yes	No	No	No	No	1	Some Information	35-49	seconedu	urban	paid	Male
master only (1)	0.173249	59	No	No	0	No Discrimination	No	No	No	Yes	Yes	No	No	No	2	Some Information	35-49	primaryedu	rural	paid	Male
master only (1)	0.176688	63	No	No	0	No Discrimination	No	No	No	Yes	No	No	No	No	1	Some Information	35-49	seconedu	rural	paid	Male
master only (1)	0.194944	64	No	No	0	No Discrimination	No	Yes	No	Yes	No	No	No	No	2	Some Information	50-54	primaryedu	urban	paid	Male
master only (1)	0.295312	63	No	No	0	No Discrimination	No	No	Yes	Yes	Yes	No	No	No	3	Some Information	35-49	highedu	rural	paid	Male
master only (1)	0.303566	13	No	No	0	No Discrimination	No	No	No	Yes	No	No	No	No	1	Some Information	35-49	seconedu	urban	paid	Male
master only (1)	0.324426	64	No	No	0	No Discrimination	No	No	No	Yes	No	No	No	No	1	Some Information	25-34	highedu	urban	paid	Male
master only (1)	0.333249	14	No	No	0	No Discrimination	No	No	No	Yes	No	No	No	No	1	Some Information	50-54	highedu	rural	paid	Male
master only (1)	0.339249	37	No	No	0	No Discrimination	No	No	No	Yes	No	No	No	No	1	Some Information	35-49	primaryedu	rural	paid	Male
master only (1)	0.375021	50	No	No	0	No Discrimination	No	No	No	Yes	No	No	No	No	1	Some Information	35-49	seconedu	urban	paid	Male
master only (1)	0.383487	2	No	No	0	No Discrimination	No	No	Yes	Yes	No	No	No	No	2	Some Information	25-34	seconedu	rural	paid	Male
master only (1)	0.386848	55	No	No	0	No Discrimination	No	No	No	No	No	No	No	No	0	No Information	35-49	seconedu	rural	paid	Male
master only (1)	0.400851	34	No	No	0	No Discrimination	Yes	No	No	Yes	No	No	No	No	2	Some Information	35-49	highedu	urban	paid	Male
master only (1)	0.412632	37	No	No	0	No Discrimination	No	No	No	No	No	No	No	No	0	No Information	35-49	primaryedu	rural	paid	Male
master only (1)	0.439284	51	No	No	0	No Discrimination	No	No	No	Yes	No	No	No	No	1	Some Information	25-34	seconedu	rural	paid	Male
master only (1)	0.502123	51	No	No	0	No Discrimination	No	No	Yes	Yes	No	No	No	No	2	Some Information	25-34	primaryedu	rural	paid	Male
master only (1)	0.581516	34	No	No	0	No Discrimination	No	No	No	Yes	No	No	No	Yes	2	Some Information	15-24	seconedu	urban	paid	Male
master only (1)	0.815534	66	No	No	0	No Discrimination	No	No	No	Yes	No	No	No	No	1	Some Information	35-49	seconedu	urban	paid	Male
master only (1)	0.9225	21	No	No	0	No Discrimination	No	No	No	Yes	No	No	No	No	1	Some Information	25-34	primaryedu	urban	paid	Male
master only (1)	0.963245	21	No	No	0	No Discrimination	No	No	No	Yes	No	No	No	No	1	Some Information	35-49	seconedu	urban	paid	Male
master only (1)	0.970649	3	No	No	0	No Discrimination	No	No	No	No	No	No	No	No	0	No Information	15-24	seconedu	urban	paid	Male
master only (1)	0.981923	41	No	No	0	No Discrimination	No	No	No	Yes	No	No	No	No	1	Some Information	25-34	seconedu	rural	paid	Male
master only (1)	1.00818	8	No	No	0	No Discrimination	No	No	No	No	No	No	No	No	0	No Information	15-24	seconedu	rural	paid	Male
master only (1)	1.02548	21	No	No	0	No Discrimination	No	No	No	Yes	No	No	No	No	1	Some Information	35-49	seconedu	urban	paid	Male
master only (1)	1.03111	21	No	No	0	No Discrimination	Yes	No	No	Yes	No	No	No	No	2	Some Information	25-34	seconedu	urban	paid	Male
master only (1)	1.03111	21	No	No	0	No Discrimination	No	No	No	Yes	No	No	No	No	1	Some Information	35-49	seconedu	urban	paid	Male
master only (1)	1.05392	41	No	No	0	No Discrimination	No	No	No	Yes	No	No	No	No	1	Some Information	35-49	noedu	rural	paid	Male
master only (1)	1.05392	41	No	No	0	No Discrimination	No	No	No	Yes	No	No	No	No	1	Some Information	15-24	seconedu	rural	paid	Male
master only (1)	1.05392	41	No	No	0	No Discrimination	Yes	No	No	Yes	No	No	No	No	2	Some Information	25-34	primaryedu	rural	paid	Male
master only (1)	1.05392	41	No	No	0	No Discrimination	No	No	No	Yes	No	No	No	No	1	Some Information	35-49	primaryedu	rural	paid	Male
master only (1)	1.08372	21	No	No	0	No Discrimination	No	No	Yes	Yes	No	No	No	No	2	Some Information	35-49	seconedu	urban	paid	Male
master only (1)	1.09063	21	No	No	0	No Discrimination	Yes	No	Yes	Yes	No	No	No	No	3	Some Information	35-49	seconedu	urban	paid	Male
master only (1)	1.14763	41	No	No	0	No Discrimination	No	Yes	Yes	Yes	No	No	No	No	3	Some Information	25-34	seconedu	rural	paid	Male
master only (1)	1.14792	43	No	No	0	No Discrimination	No	No	No	Yes	No	No	No	No	1	Some Information	25-34	primaryedu	rural	paid	Male
master only (1)	1.15569	10	No	No	0	No Discrimination	No	No	No	Yes	No	No	No	No	1	Some Information	15-24	seconedu	rural	paid	Male
master only (1)	1.18475	31	No	No	0	No Discrimination	No	No	No	Yes	Yes	No	No	No	2	Some Information	50-54	highedu	rural	paid	Male
master only (1)	1.22423	21	No	No	0	No Discrimination	No	Yes	No	Yes	No	No	No	No	2	Some Information	35-49	seconedu	urban	paid	Male
master only (1)	1.225	4	No	No	0	No Discrimination	Yes	No	Yes	Yes	No	No	No	No	3	Some Information	25-34	seconedu	rural	no paid	Male
master only (1)	1.23805	21	No	No	0	No Discrimination	Yes	No	Yes	Yes	No	No	No	Yes	4	More Information	25-34	highedu	urban	paid	Male
master only (1)	1.24151	4	No	No	0	No Discrimination	No	No	No	Yes	No	No	No	No	1	Some Information	35-49	seconedu	rural	paid	Male
master only (1)	1.25594	22	No	No	0	No Discrimination	Yes	No	Yes	Yes	No	No	No	No	3	Some Information	35-49	highedu	urban	paid	Male
master only (1)	1.27539	33	No	No	0	No Discrimination	No	No	No	Yes	Yes	Yes	No	No	3	Some Information	35-49	seconedu	rural	paid	Male
master only (1)	1.33432	22	No	No	0	No Discrimination	No	No	No	Yes	No	No	No	No	1	Some Information	35-49	seconedu	urban	paid	Male
master only (1)	1.41818	16	No	No	0	No Discrimination	No	No	No	Yes	No	No	No	No	1	Some Information	15-24	seconedu	rural	paid	Male
master only (1)	1.41818	16	No	No	0	No Discrimination	No	No	No	Yes	No	No	No	No	1	Some Information	35-49	primaryedu	rural	paid	Male
master only (1)	1.43588	8	No	No	0	No Discrimination	No	No	No	Yes	No	No	No	No	1	Some Information	35-49	seconedu	rural	paid	Male
master only (1)	1.54812	28	No	No	0	No Discrimination	No	No	Yes	Yes	No	No	No	No	2	Some Information	25-34	seconedu	urban	paid	Male
master only (1)	1.59915	24	No	No	0	No Discrimination	No	Yes	Yes	Yes	No	No	No	No	3	Some Information	25-34	seconedu	urban	paid	Male
master only (1)	1.70809	22	No	No	0	No Discrimination	Yes	No	No	No	Yes	No	No	No	2	Some Information	50-54	highedu	urban	paid	Male
master only (1)	1.70818	24	No	No	0	No Discrimination	No	No	No	Yes	No	No	No	No	1	Some Information	35-49	seconedu	urban	paid	Male
master only (1)	1.78418	24	No	No	0	No Discrimination	No	Yes	Yes	Yes	No	No	No	No	3	Some Information	35-49	primaryedu	urban	paid	Male
master only (1)	1.80567	29	No	No	0	No Discrimination	No	No	No	Yes	No	No	No	No	1	Some Information	35-49	primaryedu	rural	paid	Male
master only (1)	1.81083	28	No	No	0	No Discrimination	No	No	Yes	No	No	No	No	No	1	Some Information	35-49	seconedu	urban	paid	Male
master only (1)	1.81588	28	No	No	0	No Discrimination	No	No	No	No	No	No	No	No	0	No Information	25-34	seconedu	urban	paid	Male
master only (1)	1.82329	22	No	No	0	No Discrimination	No	Yes	No	Yes	No	No	No	No	2	Some Information	35-49	seconedu	urban	paid	Male
master only (1)	1.99455	22	No	No	0	No Discrimination	Yes	No	Yes	Yes	No	No	No	No	3	Some Information	25-34	seconedu	urban	paid	Male
master only (1)	2.10197	29	No	No	0	No Discrimination	No	No	No	Yes	No	No	No	No	1	Some Information	35-49	primaryedu	rural	paid	Male
master only (1)	2.16036	29	No	No	0	No Discrimination	No	No	No	Yes	No	No	No	No	1	Some Information	35-49	primaryedu	rural	paid	Male
master only (1)	2.16067	25	No	No	0	No Discrimination	No	Yes	No	Yes	No	No	No	No	2	Some Information	50-54	primaryedu	rural	paid	Male
master only (1)	2.18897	25	No	No	0	No Discrimination	No	Yes	No	Yes	No	No	No	No	2	Some Information	35-49	primaryedu	rural	paid	Male
master only (1)	2.27983	25	No	No	0	No Discrimination	Yes	Yes	Yes	Yes	Yes	No	No	No	5	More Information	35-49	seconedu	rural	paid	Male
master only (1)	2.45834	29	No	No	0	No Discrimination	No	No	No	Yes	No	No	No	No	1	Some Information	35-49	seconedu	rural	paid	Male
master only (1)	2.50602	29	No	No	0	No Discrimination	No	No	No	Yes	No	No	No	No	1	Some Information	35-49	seconedu	rural	paid	Male
master only (1)	0.129098	60	No	No	0	No Discrimination	No	No	Yes	Yes	No	No	No	No	2	Some Information	35-49	seconedu	urban	paid	Male
master only (1)	0.150441	54	No	No	0	No Discrimination	Yes	No	Yes	Yes	Yes	No	No	Yes	5	More Information	25-34	highedu	urban	paid	Male
master only (1)	0.172527	17	No	No	0	No Discrimination	No	No	No	Yes	No	No	No	No	1	Some Information	35-49	seconedu	urban	paid	Male
master only (1)	0.172527	17	No	No	0	No Discrimination	Yes	Yes	Yes	Yes	No	No	No	No	4	More Information	25-34	seconedu	urban	paid	Male
master only (1)	0.220531	54	No	No	0	No Discrimination	Yes	No	No	Yes	Yes	No	No	No	3	Some Information	35-49	seconedu	urban	paid	Male
master only (1)	0.23146	61	No	No	0	No Discrimination	No	No	No	No	No	No	No	No	0	No Information	25-34	primaryedu	rural	paid	Male
master only (1)	0.23146	61	No	No	0	No Discrimination	No	No	No	No	No	No	No	No	0	No Information	35-49	seconedu	rural	paid	Male
master only (1)	0.251604	17	No	No	0	No Discrimination	No	No	Yes	Yes	No	No	No	No	2	Some Information	35-49	primaryedu	urban	paid	Male
master only (1)	0.261905	44	No	No	0	No Discrimination	No	No	No	Yes	No	No	No	No	1	Some Information	50-54	primaryedu	urban	paid	Male
master only (1)	0.30552	19	No	No	0	No Discrimination	Yes	Yes	Yes	Yes	No	No	No	No	4	More Information	35-49	highedu	urban	paid	Male
master only (1)	0.379857	2	No	No	0	No Discrimination	No	No	Yes	Yes	No	No	No	No	2	Some Information	35-49	seconedu	rural	paid	Male
master only (1)	0.429211	18	No	No	0	No Discrimination	No	Yes	No	Yes	No	No	No	No	2	Some Information	35-49	seconedu	rural	paid	Male
master only (1)	0.435814	37	No	No	0	No Discrimination	No	No	Yes	Yes	No	No	No	No	2	Some Information	35-49	highedu	rural	paid	Male
master only (1)	0.436234	48	No	No	0	No Discrimination	No	No	Yes	Yes	No	No	No	No	2	Some Information	35-49	seconedu	urban	paid	Male
master only (1)	0.446149	48	No	No	0	No Discrimination	No	No	No	Yes	No	No	No	No	1	Some Information	50-54	seconedu	urban	paid	Male
master only (1)	0.45091	18	No	No	0	No Discrimination	No	No	No	Yes	Yes	No	No	No	2	Some Information	50-54	primaryedu	rural	no paid	Male
master only (1)	0.497504	18	No	No	0	No Discrimination	Yes	Yes	Yes	Yes	No	No	No	No	4	More Information	35-49	seconedu	rural	paid	Male
master only (1)	0.517027	44	No	No	0	No Discrimination	No	No	No	Yes	No	No	No	No	1	Some Information	35-49	seconedu	urban	paid	Male
master only (1)	0.525825	9	No	No	0	No Discrimination	No	No	No	Yes	No	No	No	No	1	Some Information	35-49	seconedu	urban	paid	Male
master only (1)	0.537737	38	No	No	0	No Discrimination	No	Yes	No	Yes	No	No	No	No	2	Some Information	25-34	seconedu	urban	paid	Male
master only (1)	0.563873	41	No	No	0	No Discrimination	No	No	No	Yes	No	No	No	No	1	Some Information	35-49	seconedu	rural	paid	Male
master only (1)	0.569738	52	No	No	0	No Discrimination	No	No	Yes	Yes	No	No	No	No	2	Some Information	50-54	seconedu	urban	paid	Male
master only (1)	0.581516	34	No	No	0	No Discrimination	No	No	No	Yes	No	No	No	No	1	Some Information	35-49	primaryedu	urban	paid	Male
master only (1)	0.59267	42	No	No	0	No Discrimination	Yes	No	Yes	Yes	No	No	No	No	3	Some Information	35-49	seconedu	urban	paid	Male
master only (1)	0.598979	39	No	No	0	No Discrimination	No	No	No	No	No	No	No	No	0	No Information	35-49	seconedu	rural	paid	Male
master only (1)	0.598979	39	No	No	0	No Discrimination	No	No	No	No	No	No	No	No	0	No Information	35-49	noedu	rural	paid	Male
master only (1)	0.605275	52	No	No	0	No Discrimination	No	No	No	Yes	No	No	No	No	1	Some Information	50-54	seconedu	urban	paid	Male
master only (1)	0.630012	38	No	No	0	No Discrimination	No	No	No	No	No	No	No	No	0	No Information	35-49	seconedu	urban	paid	Male
master only (1)	0.63669	42	No	No	0	No Discrimination	Yes	No	No	Yes	No	Yes	No	Yes	4	More Information	25-34	highedu	urban	paid	Male
master only (1)	0.63669	42	No	No	0	No Discrimination	No	No	No	Yes	No	No	No	No	1	Some Information	35-49	seconedu	urban	paid	Male
master only (1)	0.65089	52	No	No	0	No Discrimination	No	No	No	Yes	No	No	No	No	1	Some Information	35-49	seconedu	urban	paid	Male
master only (1)	0.651906	38	No	No	0	No Discrimination	No	No	No	No	No	No	No	No	0	No Information	25-34	seconedu	urban	paid	Male
master only (1)	0.651906	38	No	No	0	No Discrimination	No	No	No	No	No	No	No	No	0	No Information	25-34	seconedu	urban	paid	Male
master only (1)	0.656503	52	No	No	0	No Discrimination	No	No	No	Yes	No	No	No	No	1	Some Information	25-34	seconedu	urban	paid	Male
master only (1)	0.689698	38	No	No	0	No Discrimination	No	No	No	Yes	No	No	No	No	1	Some Information	25-34	highedu	urban	paid	Male
master only (1)	0.704883	21	No	No	0	No Discrimination	Yes	No	No	Yes	No	No	No	No	2	Some Information	35-49	highedu	urban	paid	Male
master only (1)	0.711115	5	No	No	0	No Discrimination	Yes	No	Yes	Yes	No	No	No	No	3	Some Information	35-49	highedu	urban	paid	Male
master only (1)	0.712875	39	No	No	0	No Discrimination	No	No	No	Yes	No	No	No	No	1	Some Information	25-34	seconedu	rural	paid	Male
master only (1)	0.712875	39	No	No	0	No Discrimination	No	No	No	No	No	No	No	No	0	No Information	25-34	seconedu	rural	paid	Male
master only (1)	0.712875	39	No	No	0	No Discrimination	No	No	No	Yes	No	No	No	No	1	Some Information	35-49	highedu	rural	paid	Male
master only (1)	0.715699	21	No	No	0	No Discrimination	No	No	No	Yes	No	No	No	No	1	Some Information	25-34	seconedu	urban	paid	Male
master only (1)	0.72986	7	No	No	0	No Discrimination	No	No	No	Yes	No	No	No	No	1	Some Information	35-49	highedu	urban	paid	Male
master only (1)	0.74315	38	No	No	0	No Discrimination	No	No	No	No	No	No	No	No	0	No Information	35-49	primaryedu	urban	paid	Male
master only (1)	0.74315	38	No	No	0	No Discrimination	No	No	No	No	No	No	No	Yes	1	Some Information	25-34	seconedu	urban	paid	Male
master only (1)	0.74706	35	No	No	0	No Discrimination	No	No	No	Yes	Yes	No	No	No	2	Some Information	25-34	highedu	rural	paid	Male
master only (1)	0.760195	4	No	No	0	No Discrimination	No	No	Yes	Yes	Yes	No	No	Yes	4	More Information	35-49	highedu	rural	paid	Male
master only (1)	0.784364	26	No	No	0	No Discrimination	No	No	Yes	Yes	No	No	No	No	2	Some Information	50-54	highedu	urban	paid	Male
master only (1)	0.791326	3	No	No	0	No Discrimination	No	No	Yes	Yes	No	No	No	No	2	Some Information	25-34	seconedu	urban	paid	Male
master only (1)	0.805587	34	No	No	0	No Discrimination	No	No	No	No	No	No	No	No	0	No Information	35-49	seconedu	urban	paid	Male
master only (1)	0.833587	21	No	No	0	No Discrimination	No	No	No	Yes	No	No	No	No	1	Some Information	35-49	seconedu	urban	paid	Male
master only (1)	0.838532	3	No	No	0	No Discrimination	No	No	No	Yes	No	No	No	No	1	Some Information	35-49	primaryedu	urban	paid	Male
master only (1)	0.850644	26	No	No	0	No Discrimination	No	No	Yes	Yes	No	No	No	No	2	Some Information	25-34	primaryedu	urban	paid	Male
master only (1)	0.855234	21	No	No	0	No Discrimination	Yes	No	Yes	Yes	No	No	No	No	3	Some Information	25-34	seconedu	urban	paid	Male
master only (1)	0.863637	39	No	No	0	No Discrimination	No	No	No	No	No	No	No	No	0	No Information	25-34	highedu	rural	paid	Male
master only (1)	0.903217	21	No	No	0	No Discrimination	Yes	No	Yes	No	Yes	No	No	No	3	Some Information	25-34	seconedu	urban	paid	Male
master only (1)	0.905287	41	No	No	0	No Discrimination	Yes	No	No	Yes	No	No	No	Yes	3	Some Information	15-24	seconedu	rural	paid	Male
master only (1)	0.906497	4	No	No	0	No Discrimination	Yes	Yes	Yes	Yes	No	No	No	No	4	More Information	25-34	seconedu	rural	paid	Male
master only (1)	0.945065	35	No	No	0	No Discrimination	No	No	No	No	No	No	No	No	0	No Information	35-49	primaryedu	rural	paid	Male
master only (1)	0.949906	53	No	No	0	No Discrimination	No	No	No	Yes	No	No	No	No	1	Some Information	35-49	seconedu	rural	paid	Male
master only (1)	0.973066	21	No	No	0	No Discrimination	No	No	No	Yes	No	No	No	No	1	Some Information	35-49	primaryedu	urban	paid	Male
master only (1)	0.98465	21	No	No	0	No Discrimination	Yes	No	Yes	Yes	No	No	No	No	3	Some Information	50-54	seconedu	urban	paid	Male
master only (1)	1.00777	39	No	No	0	No Discrimination	Yes	No	No	No	No	No	No	No	1	Some Information	25-34	highedu	rural	paid	Male
master only (1)	1.01472	21	No	No	0	No Discrimination	No	No	Yes	Yes	No	No	No	No	2	Some Information	35-49	seconedu	urban	paid	Male
master only (1)	1.03174	42	No	No	0	No Discrimination	No	No	No	Yes	No	No	No	No	1	Some Information	35-49	primaryedu	urban	paid	Male
master only (1)	1.05143	53	No	No	0	No Discrimination	No	Yes	Yes	Yes	No	No	No	No	3	Some Information	35-49	seconedu	rural	paid	Male
master only (1)	1.06648	53	No	No	0	No Discrimination	Yes	No	No	Yes	No	No	No	No	2	Some Information	25-34	seconedu	rural	paid	Male
master only (1)	1.06648	53	No	No	0	No Discrimination	No	No	No	Yes	No	No	No	No	1	Some Information	35-49	noedu	rural	paid	Male
master only (1)	1.07591	21	No	No	0	No Discrimination	Yes	No	No	Yes	No	No	No	Yes	3	Some Information	35-49	highedu	urban	paid	Male
master only (1)	1.07591	21	No	No	0	No Discrimination	No	No	No	Yes	No	No	No	No	1	Some Information	35-49	seconedu	urban	paid	Male
master only (1)	1.08264	3	No	No	0	No Discrimination	Yes	No	Yes	No	Yes	No	No	No	3	Some Information	25-34	highedu	urban	paid	Male
master only (1)	1.11669	26	No	No	0	No Discrimination	Yes	No	No	Yes	No	No	No	No	2	Some Information	25-34	seconedu	urban	paid	Male
master only (1)	1.11669	26	No	No	0	No Discrimination	Yes	No	Yes	Yes	No	No	No	No	3	Some Information	25-34	seconedu	urban	paid	Male
master only (1)	1.14339	21	No	No	0	No Discrimination	No	No	No	Yes	No	No	No	No	1	Some Information	35-49	seconedu	urban	paid	Male
master only (1)	1.17394	3	No	No	0	No Discrimination	Yes	Yes	Yes	Yes	No	No	No	No	4	More Information	35-49	primaryedu	urban	paid	Male
master only (1)	1.18772	10	No	No	0	No Discrimination	No	No	No	Yes	No	No	No	No	1	Some Information	35-49	seconedu	rural	paid	Male
master only (1)	1.21584	30	No	No	0	No Discrimination	No	Yes	No	Yes	No	No	No	No	2	Some Information	25-34	seconedu	urban	paid	Male
master only (1)	1.22335	24	No	No	0	No Discrimination	No	No	No	Yes	No	No	No	No	1	Some Information	35-49	seconedu	urban	paid	Male
master only (1)	1.23462	21	No	No	0	No Discrimination	Yes	No	No	Yes	No	No	No	No	2	Some Information	25-34	seconedu	urban	paid	Male
master only (1)	1.23805	21	No	No	0	No Discrimination	Yes	No	No	Yes	No	No	No	No	2	Some Information	25-34	highedu	urban	paid	Male
master only (1)	1.24151	4	No	No	0	No Discrimination	No	No	No	Yes	No	No	No	No	1	Some Information	35-49	seconedu	rural	paid	Male
master only (1)	1.24464	21	No	No	0	No Discrimination	Yes	No	No	Yes	No	No	No	No	2	Some Information	35-49	highedu	urban	paid	Male
master only (1)	1.25309	21	No	No	0	No Discrimination	Yes	No	No	Yes	No	No	No	No	2	Some Information	15-24	seconedu	urban	paid	Male
master only (1)	1.25309	21	No	No	0	No Discrimination	No	No	No	Yes	No	No	No	No	1	Some Information	35-49	seconedu	urban	paid	Male
master only (1)	1.25309	21	No	No	0	No Discrimination	No	No	No	Yes	No	No	No	No	1	Some Information	35-49	seconedu	urban	paid	Male
master only (1)	1.27609	24	No	No	0	No Discrimination	No	No	No	Yes	No	Yes	No	No	2	Some Information	35-49	seconedu	urban	paid	Male
master only (1)	1.29343	22	No	No	0	No Discrimination	No	No	No	Yes	No	No	No	No	1	Some Information	50-54	seconedu	urban	paid	Male
master only (1)	1.32423	21	No	No	0	No Discrimination	No	No	No	Yes	No	No	No	No	1	Some Information	35-49	seconedu	urban	paid	Male
master only (1)	1.33257	22	No	No	0	No Discrimination	No	No	No	No	No	Yes	No	No	1	Some Information	35-49	seconedu	urban	paid	Male
master only (1)	1.33716	22	No	No	0	No Discrimination	Yes	No	No	Yes	Yes	No	No	Yes	4	More Information	35-49	highedu	urban	paid	Male
master only (1)	1.34985	16	No	No	0	No Discrimination	No	No	No	Yes	Yes	No	No	No	2	Some Information	25-34	seconedu	rural	paid	Male
master only (1)	1.34993	24	No	No	0	No Discrimination	Yes	No	Yes	No	No	No	No	Yes	3	Some Information	25-34	highedu	urban	paid	Male
master only (1)	1.37028	29	No	No	0	No Discrimination	No	No	No	Yes	No	No	No	No	1	Some Information	35-49	primaryedu	rural	paid	Male
master only (1)	1.39155	22	No	No	0	No Discrimination	No	No	Yes	Yes	No	No	No	No	2	Some Information	35-49	seconedu	urban	paid	Male
master only (1)	1.4317	21	No	No	0	No Discrimination	No	No	No	Yes	No	No	No	Yes	2	Some Information	35-49	seconedu	urban	paid	Male
master only (1)	1.43603	21	No	No	0	No Discrimination	Yes	No	No	Yes	No	No	No	No	2	Some Information	25-34	seconedu	urban	paid	Male
master only (1)	1.43603	21	No	No	0	No Discrimination	No	No	No	Yes	No	No	No	No	1	Some Information	50-54	seconedu	urban	paid	Male
master only (1)	1.46814	22	No	No	0	No Discrimination	Yes	No	No	Yes	Yes	No	No	No	3	Some Information	35-49	highedu	urban	paid	Male
master only (1)	1.4868	38	No	No	0	No Discrimination	No	No	No	Yes	No	No	No	No	1	Some Information	35-49	primaryedu	urban	paid	Male
master only (1)	1.4868	38	No	No	0	No Discrimination	No	No	No	Yes	No	No	No	No	1	Some Information	35-49	seconedu	urban	paid	Male
master only (1)	1.51839	24	No	No	0	No Discrimination	Yes	No	Yes	Yes	No	No	No	No	3	Some Information	35-49	highedu	urban	paid	Male
master only (1)	1.55414	16	No	No	0	No Discrimination	No	No	No	Yes	No	No	No	No	1	Some Information	25-34	seconedu	rural	paid	Male
master only (1)	1.55414	16	No	No	0	No Discrimination	No	No	No	Yes	No	No	No	No	1	Some Information	25-34	seconedu	rural	paid	Male
master only (1)	1.55534	12	No	No	0	No Discrimination	No	No	No	Yes	No	No	No	No	1	Some Information	35-49	seconedu	rural	paid	Male
master only (1)	1.55534	12	No	No	0	No Discrimination	No	No	No	Yes	No	No	No	No	1	Some Information	50-54	seconedu	rural	paid	Male
master only (1)	1.57924	22	No	No	0	No Discrimination	Yes	No	Yes	Yes	No	No	No	No	3	Some Information	25-34	seconedu	urban	paid	Male
master only (1)	1.58151	22	No	No	0	No Discrimination	No	Yes	No	Yes	No	No	No	No	2	Some Information	35-49	primaryedu	urban	paid	Male
master only (1)	1.58525	28	No	No	0	No Discrimination	No	No	Yes	Yes	No	No	No	No	2	Some Information	35-49	seconedu	urban	paid	Male
master only (1)	1.59915	24	No	No	0	No Discrimination	No	No	No	Yes	No	No	No	No	1	Some Information	25-34	primaryedu	urban	paid	Male
master only (1)	1.60154	28	No	No	0	No Discrimination	No	Yes	No	Yes	No	No	No	No	2	Some Information	50-54	primaryedu	urban	paid	Male
master only (1)	1.60429	28	No	No	0	No Discrimination	No	No	No	Yes	No	No	No	No	1	Some Information	50-54	seconedu	urban	paid	Male
master only (1)	1.60696	28	No	No	0	No Discrimination	No	No	No	Yes	Yes	No	No	No	2	Some Information	25-34	primaryedu	urban	paid	Male
master only (1)	1.61577	22	No	No	0	No Discrimination	No	No	No	Yes	No	No	No	No	1	Some Information	25-34	seconedu	urban	paid	Male
master only (1)	1.62551	21	No	No	0	No Discrimination	Yes	No	No	Yes	No	No	No	No	2	Some Information	35-49	highedu	urban	paid	Male
master only (1)	1.62551	21	No	No	0	No Discrimination	Yes	No	Yes	Yes	No	No	No	No	3	Some Information	35-49	highedu	urban	paid	Male
master only (1)	1.66375	28	No	No	0	No Discrimination	Yes	No	No	Yes	No	No	No	No	2	Some Information	35-49	seconedu	urban	paid	Male
master only (1)	1.67353	24	No	No	0	No Discrimination	Yes	No	Yes	Yes	No	No	No	No	3	Some Information	35-49	seconedu	urban	paid	Male
master only (1)	1.69034	22	No	No	0	No Discrimination	No	No	No	Yes	No	No	No	No	1	Some Information	35-49	seconedu	urban	paid	Male
master only (1)	1.69682	22	No	No	0	No Discrimination	No	No	No	Yes	No	No	No	No	1	Some Information	35-49	seconedu	urban	paid	Male
master only (1)	1.72721	28	No	No	0	No Discrimination	No	No	No	No	No	No	No	No	0	No Information	35-49	seconedu	urban	paid	Male
master only (1)	1.73607	28	No	No	0	No Discrimination	No	No	No	Yes	No	No	No	No	1	Some Information	35-49	seconedu	urban	paid	Male
master only (1)	1.75119	21	No	No	0	No Discrimination	No	No	Yes	Yes	No	No	No	No	2	Some Information	35-49	seconedu	urban	paid	Male
master only (1)	1.76851	28	No	No	0	No Discrimination	No	No	No	No	Yes	No	No	No	1	Some Information	35-49	seconedu	urban	paid	Male
master only (1)	1.7692	27	No	No	0	No Discrimination	No	No	Yes	Yes	Yes	Yes	No	No	4	More Information	50-54	seconedu	rural	paid	Male
master only (1)	1.83879	22	No	No	0	No Discrimination	No	No	No	Yes	No	No	No	No	1	Some Information	35-49	primaryedu	urban	paid	Male
master only (1)	2.01541	28	No	No	0	No Discrimination	No	Yes	No	Yes	No	No	No	No	2	Some Information	25-34	seconedu	urban	paid	Male
master only (1)	2.06434	29	No	No	0	No Discrimination	No	Yes	No	Yes	No	No	No	No	2	Some Information	35-49	seconedu	rural	paid	Male
master only (1)	2.10834	25	No	No	0	No Discrimination	No	Yes	Yes	Yes	No	No	No	No	3	Some Information	25-34	seconedu	rural	paid	Male
master only (1)	2.11627	29	No	No	0	No Discrimination	No	No	No	No	No	No	No	No	0	No Information	25-34	primaryedu	rural	paid	Male
master only (1)	2.13351	25	No	No	0	No Discrimination	No	Yes	Yes	Yes	No	No	No	No	3	Some Information	35-49	seconedu	rural	paid	Male
master only (1)	2.14906	25	No	No	0	No Discrimination	No	No	No	Yes	No	No	No	Yes	2	Some Information	15-24	seconedu	rural	paid	Male
master only (1)	2.19213	29	No	No	0	No Discrimination	No	No	No	Yes	No	No	No	No	1	Some Information	35-49	primaryedu	rural	paid	Male
master only (1)	2.29709	29	No	No	0	No Discrimination	No	Yes	Yes	Yes	No	No	No	No	3	Some Information	35-49	seconedu	rural	paid	Male
master only (1)	2.59405	28	No	No	0	No Discrimination	No	No	No	Yes	No	No	No	No	1	Some Information	35-49	seconedu	urban	paid	Male
master only (1)	2.75594	22	No	No	0	No Discrimination	Yes	No	No	Yes	No	No	No	No	2	Some Information	35-49	seconedu	urban	paid	Male
master only (1)	3.10104	23	No	No	0	No Discrimination	No	No	No	Yes	No	No	No	No	1	Some Information	50-54	seconedu	rural	paid	Male
master only (1)	0.145332	59	No	No	0	No Discrimination	No	No	No	Yes	No	No	No	No	1	Some Information	35-49	seconedu	rural	paid	Male
master only (1)	0.256374	52	No	No	0	No Discrimination	No	No	No	No	Yes	No	No	No	1	Some Information	35-49	seconedu	urban	paid	Male
master only (1)	0.461716	51	No	No	0	No Discrimination	No	No	No	Yes	No	No	No	No	1	Some Information	25-34	seconedu	rural	paid	Male
master only (1)	0.867867	3	No	No	0	No Discrimination	Yes	Yes	Yes	Yes	No	No	No	No	4	More Information	35-49	seconedu	urban	paid	Male
master only (1)	1.52908	22	No	No	0	No Discrimination	No	No	Yes	Yes	No	No	No	No	2	Some Information	50-54	seconedu	urban	paid	Male
master only (1)	1.56281	24	No	No	0	No Discrimination	No	No	No	Yes	No	No	No	No	1	Some Information	35-49	seconedu	urban	paid	Male
master only (1)	1.93889	25	No	No	0	No Discrimination	No	No	No	Yes	No	No	No	No	1	Some Information	35-49	seconedu	rural	paid	Male
master only (1)	1.93889	25	No	No	0	No Discrimination	No	No	No	Yes	No	No	No	No	1	Some Information	25-34	primaryedu	rural	paid	Male
master only (1)	0.132078	59	No	No	0	No Discrimination	No	No	No	Yes	No	No	No	No	1	Some Information	35-49	seconedu	rural	paid	Male
master only (1)	0.164527	59	No	No	0	No Discrimination	No	No	No	No	No	No	No	No	0	No Information	35-49	seconedu	rural	no paid	Male
master only (1)	0.429391	51	No	No	0	No Discrimination	No	No	No	Yes	No	No	No	No	1	Some Information	35-49	seconedu	rural	paid	Male
master only (1)	0.607867	40	No	No	0	No Discrimination	No	No	No	Yes	No	No	No	No	1	Some Information	35-49	primaryedu	urban	paid	Male
master only (1)	1.15058	6	No	No	0	No Discrimination	No	No	No	Yes	No	No	No	No	1	Some Information	35-49	seconedu	rural	paid	Male
master only (1)	1.33432	22	No	No	0	No Discrimination	No	No	Yes	Yes	No	No	No	No	2	Some Information	35-49	seconedu	urban	paid	Male
master only (1)	0.343516	37	No	No	0	No Discrimination	No	No	No	Yes	No	Yes	No	No	2	Some Information	25-34	highedu	rural	paid	Male
master only (1)	0.840746	3	No	No	0	No Discrimination	Yes	No	Yes	Yes	No	No	No	No	3	Some Information	25-34	seconedu	urban	paid	Male
master only (1)	0.840746	3	No	No	0	No Discrimination	Yes	No	Yes	Yes	No	No	No	No	3	Some Information	25-34	seconedu	urban	paid	Male
master only (1)	0.841173	3	No	No	0	No Discrimination	No	No	Yes	Yes	No	No	No	No	2	Some Information	35-49	highedu	urban	paid	Male
master only (1)	0.987889	26	No	No	0	No Discrimination	Yes	No	Yes	Yes	No	No	No	No	3	Some Information	35-49	seconedu	urban	paid	Male
master only (1)	1.29058	12	No	No	0	No Discrimination	No	No	Yes	Yes	No	No	No	No	2	Some Information	35-49	seconedu	rural	paid	Male
master only (1)	1.33512	12	No	No	0	No Discrimination	Yes	No	No	Yes	No	No	No	No	2	Some Information	15-24	seconedu	rural	paid	Male
master only (1)	1.36557	30	No	No	0	No Discrimination	No	No	Yes	Yes	No	No	No	No	2	Some Information	35-49	primaryedu	urban	paid	Male
master only (1)	1.38349	31	No	No	0	No Discrimination	Yes	No	Yes	Yes	No	No	No	No	3	Some Information	35-49	seconedu	rural	paid	Male
master only (1)	1.72804	22	No	No	0	No Discrimination	Yes	No	No	Yes	No	No	No	Yes	3	Some Information	25-34	seconedu	urban	paid	Male
master only (1)	1.95737	25	No	No	0	No Discrimination	Yes	No	Yes	Yes	No	Yes	No	Yes	5	More Information	25-34	highedu	rural	paid	Male
master only (1)	2.74537	23	No	No	0	No Discrimination	No	No	No	Yes	No	No	No	No	1	Some Information	15-24	seconedu	rural	paid	Male
master only (1)	0.164321	58	No	No	0	No Discrimination	No	No	No	Yes	No	No	No	No	1	Some Information	15-24	seconedu	urban	paid	Male
master only (1)	0.320995	37	No	No	0	No Discrimination	No	Yes	No	No	Yes	No	No	No	2	Some Information	25-34	primaryedu	rural	paid	Male
master only (1)	0.393877	55	No	No	0	No Discrimination	No	No	No	Yes	No	No	No	No	1	Some Information	25-34	seconedu	rural	paid	Male
master only (1)	0.427313	37	No	No	0	No Discrimination	No	No	No	No	No	No	No	No	0	No Information	35-49	primaryedu	rural	no paid	Male
master only (1)	1.23805	21	No	No	0	No Discrimination	No	No	No	Yes	No	No	No	No	1	Some Information	25-34	primaryedu	urban	paid	Male
master only (1)	1.73607	28	No	No	0	No Discrimination	No	No	No	Yes	No	No	No	No	1	Some Information	35-49	primaryedu	urban	paid	Male
master only (1)	1.86853	25	No	No	0	No Discrimination	No	Yes	No	Yes	No	No	No	No	2	Some Information	35-49	primaryedu	rural	paid	Male
master only (1)	1.96181	25	No	No	0	No Discrimination	No	No	No	No	No	No	No	No	0	No Information	35-49	primaryedu	rural	paid	Male
master only (1)	0.062992	65	No	No	0	No Discrimination	No	No	No	No	No	Yes	No	No	1	Some Information	50-54	primaryedu	rural	paid	Male
master only (1)	1.05205	53	No	No	0	No Discrimination	No	No	No	Yes	No	No	No	No	1	Some Information	50-54	seconedu	rural	paid	Male
master only (1)	1.12031	16	No	No	0	No Discrimination	No	No	No	Yes	No	No	No	No	1	Some Information	35-49	primaryedu	rural	paid	Male
master only (1)	1.82329	22	No	No	0	No Discrimination	No	No	No	Yes	No	No	No	No	1	Some Information	25-34	seconedu	urban	paid	Male
master only (1)	0.269546	64	No	No	0	No Discrimination	No	No	No	Yes	Yes	No	No	No	2	Some Information	25-34	seconedu	urban	paid	Male
master only (1)	0.502823	51	No	No	0	No Discrimination	No	No	No	Yes	No	No	No	No	1	Some Information	25-34	primaryedu	rural	paid	Male
master only (1)	0.761837	42	No	No	0	No Discrimination	No	No	No	Yes	No	No	No	No	1	Some Information	35-49	primaryedu	urban	paid	Male
master only (1)	0.82386	3	No	No	0	No Discrimination	No	No	Yes	Yes	No	No	No	No	2	Some Information	25-34	seconedu	urban	paid	Male
master only (1)	1.0464	43	No	No	0	No Discrimination	No	No	No	Yes	No	No	No	No	1	Some Information	35-49	primaryedu	rural	paid	Male
master only (1)	1.55983	24	No	No	0	No Discrimination	No	No	No	No	No	No	No	No	0	No Information	25-34	primaryedu	urban	paid	Male
master only (1)	0.08223	60	No	No	0	No Discrimination	Yes	No	No	Yes	Yes	No	No	No	3	Some Information	25-34	highedu	urban	paid	Male
master only (1)	0.101417	60	No	No	0	No Discrimination	No	No	No	Yes	No	No	No	No	1	Some Information	35-49	highedu	urban	paid	Male
master only (1)	0.257414	55	No	No	0	No Discrimination	No	No	No	No	No	No	No	No	0	No Information	15-24	seconedu	rural	paid	Male
master only (1)	0.269546	64	No	No	0	No Discrimination	No	Yes	Yes	Yes	Yes	No	No	No	4	More Information	35-49	highedu	urban	paid	Male
master only (1)	0.387002	2	No	No	0	No Discrimination	No	No	No	Yes	No	No	No	No	1	Some Information	25-34	primaryedu	rural	paid	Male
master only (1)	0.768313	3	No	No	0	No Discrimination	No	No	Yes	Yes	No	No	No	No	2	Some Information	25-34	highedu	urban	paid	Male
master only (1)	0.800625	26	No	No	0	No Discrimination	No	No	Yes	Yes	No	No	No	No	2	Some Information	50-54	seconedu	urban	paid	Male
master only (1)	0.807256	4	No	No	0	No Discrimination	No	No	No	Yes	No	No	No	Yes	2	Some Information	35-49	highedu	rural	paid	Male
master only (1)	0.898169	26	No	No	0	No Discrimination	Yes	No	No	Yes	Yes	No	No	Yes	4	More Information	35-49	highedu	urban	no paid	Male
master only (1)	1.07591	21	No	No	0	No Discrimination	No	No	No	Yes	No	No	No	No	1	Some Information	35-49	seconedu	urban	paid	Male
master only (1)	1.09757	26	No	No	0	No Discrimination	No	No	No	Yes	No	Yes	No	No	2	Some Information	50-54	seconedu	urban	no paid	Male
master only (1)	1.23805	21	No	No	0	No Discrimination	No	No	No	Yes	No	No	No	No	1	Some Information	35-49	seconedu	urban	paid	Male
master only (1)	1.6219	22	No	No	0	No Discrimination	No	No	No	No	No	No	No	No	0	No Information	35-49	seconedu	urban	paid	Male
master only (1)	1.96016	22	No	No	0	No Discrimination	No	No	No	Yes	No	No	No	No	1	Some Information	50-54	seconedu	urban	paid	Male
master only (1)	0.347127	44	No	No	0	No Discrimination	Yes	No	No	Yes	No	No	No	No	2	Some Information	25-34	seconedu	urban	paid	Male
master only (1)	0.4228	55	No	No	0	No Discrimination	No	No	No	Yes	No	No	No	No	1	Some Information	25-34	seconedu	rural	paid	Male
master only (1)	0.186319	55	No	No	0	No Discrimination	No	No	No	Yes	No	No	No	No	1	Some Information	25-34	seconedu	rural	paid	Male
master only (1)	0.83977	9	No	No	0	No Discrimination	No	No	No	Yes	No	No	No	No	1	Some Information	25-34	seconedu	urban	paid	Male
master only (1)	1.39948	22	No	No	0	No Discrimination	No	No	No	Yes	No	No	No	No	1	Some Information	35-49	seconedu	urban	paid	Male
master only (1)	1.45507	31	No	No	0	No Discrimination	No	No	No	Yes	No	No	No	No	1	Some Information	35-49	primaryedu	rural	paid	Male
master only (1)	0.4228	55	No	No	0	No Discrimination	No	No	No	Yes	No	No	No	No	1	Some Information	25-34	seconedu	rural	paid	Male
master only (1)	1.30196	33	No	No	0	No Discrimination	Yes	No	No	Yes	No	No	No	No	2	Some Information	35-49	primaryedu	rural	paid	Male
master only (1)	0.233191	65	No	No	0	No Discrimination	No	No	No	Yes	No	No	No	No	1	Some Information	35-49	seconedu	rural	paid	Male
master only (1)	0.880747	3	No	No	0	No Discrimination	Yes	No	Yes	Yes	No	No	No	No	3	Some Information	35-49	highedu	urban	paid	Male
master only (1)	1.08091	53	No	No	0	No Discrimination	No	No	No	Yes	No	No	No	No	1	Some Information	35-49	primaryedu	rural	paid	Male
master only (1)	1.1827	30	No	No	0	No Discrimination	No	No	No	Yes	No	No	No	No	1	Some Information	35-49	seconedu	urban	paid	Male
master only (1)	2.19213	29	No	No	0	No Discrimination	No	No	No	No	No	No	No	No	0	No Information	35-49	primaryedu	rural	paid	Male
master only (1)	1.81083	28	No	No	0	No Discrimination	No	No	No	No	No	No	No	No	0	No Information	25-34	primaryedu	urban	paid	Male
master only (1)	0.801476	21	No	No	0	No Discrimination	Yes	No	No	Yes	No	No	No	No	2	Some Information	50-54	highedu	urban	paid	Male
master only (1)	0.387629	37	No	No	0	No Discrimination	No	Yes	No	No	Yes	No	No	No	2	Some Information	50-54	primaryedu	rural	paid	Male
master only (1)	1.22335	24	No	No	0	No Discrimination	No	No	Yes	Yes	No	No	No	No	2	Some Information	25-34	seconedu	urban	paid	Male
master only (1)	1.73635	28	No	No	0	No Discrimination	No	No	No	Yes	No	No	No	No	1	Some Information	25-34	seconedu	urban	paid	Male
master only (1)	1.67012	32	No	No	0	No Discrimination	No	No	No	No	Yes	No	No	No	1	Some Information	35-49	seconedu	urban	paid	Male
master only (1)	0.375021	50	No	No	0	No Discrimination	No	No	No	Yes	Yes	No	No	No	2	Some Information	15-24	seconedu	urban	paid	Male
master only (1)	2.26626	29	No	No	0	No Discrimination	No	No	No	Yes	No	No	No	No	1	Some Information	35-49	primaryedu	rural	paid	Male
master only (1)	1.24977	4	No	No	0	No Discrimination	No	No	No	Yes	No	No	No	No	1	Some Information	35-49	seconedu	rural	paid	Male
master only (1)	0.457258	2	No	No	0	No Discrimination	Yes	No	Yes	Yes	No	No	No	No	3	Some Information	25-34	highedu	rural	paid	Male
master only (1)	0.33967	37	No	No	0	No Discrimination	Yes	Yes	No	Yes	Yes	No	No	No	4	More Information	25-34	highedu	rural	paid	Male
master only (1)	0.411648	57	No	No	0	No Discrimination	No	No	No	Yes	No	No	No	No	1	Some Information	50-54	seconedu	rural	paid	Male
master only (1)	0.421683	37	No	No	0	No Discrimination	No	Yes	No	Yes	No	No	No	No	2	Some Information	35-49	seconedu	rural	paid	Male
master only (1)	0.529238	51	No	No	0	No Discrimination	No	No	No	Yes	No	No	No	No	1	Some Information	15-24	seconedu	rural	paid	Male
master only (1)	0.85082	30	No	No	0	No Discrimination	No	No	Yes	No	Yes	No	No	No	2	Some Information	50-54	seconedu	urban	paid	Male
master only (1)	1.24977	4	No	No	0	No Discrimination	No	No	No	No	No	No	No	No	0	No Information	35-49	seconedu	rural	no paid	Male
master only (1)	1.73635	28	No	No	0	No Discrimination	No	Yes	Yes	Yes	No	No	No	No	3	Some Information	35-49	seconedu	urban	paid	Male
master only (1)	1.88995	25	No	No	0	No Discrimination	No	No	No	Yes	No	No	No	No	1	Some Information	35-49	primaryedu	rural	paid	Male
master only (1)	2.2424	29	No	No	0	No Discrimination	No	Yes	No	No	No	No	No	No	1	Some Information	25-34	seconedu	rural	paid	Male
master only (1)	0.063091	47	No	No	0	No Discrimination	Yes	No	Yes	Yes	No	No	No	No	3	Some Information	35-49	highedu	rural	paid	Male
master only (1)	0.243679	50	No	No	0	No Discrimination	No	No	Yes	No	No	Yes	No	No	2	Some Information	50-54	seconedu	urban	paid	Male
master only (1)	0.289182	19	No	No	0	No Discrimination	No	No	No	Yes	No	No	No	No	1	Some Information	35-49	primaryedu	urban	paid	Male
master only (1)	0.327786	51	No	No	0	No Discrimination	Yes	No	No	Yes	No	No	No	Yes	3	Some Information	25-34	highedu	rural	paid	Male
master only (1)	0.518053	51	No	No	0	No Discrimination	No	No	No	Yes	No	No	No	No	1	Some Information	35-49	primaryedu	rural	paid	Male
master only (1)	0.871995	51	No	No	0	No Discrimination	No	No	No	Yes	No	No	No	No	1	Some Information	25-34	seconedu	rural	paid	Male
master only (1)	1.58077	24	No	No	0	No Discrimination	Yes	No	Yes	Yes	No	No	No	No	3	Some Information	50-54	highedu	urban	paid	Male
master only (1)	0.59267	42	No	No	0	No Discrimination	No	No	No	Yes	No	No	No	No	1	Some Information	35-49	primaryedu	urban	paid	Male
master only (1)	0.784364	26	No	No	0	No Discrimination	No	No	Yes	Yes	No	No	No	No	2	Some Information	35-49	seconedu	urban	paid	Male
master only (1)	0.854069	26	No	No	0	No Discrimination	Yes	No	No	Yes	No	No	No	No	2	Some Information	25-34	seconedu	urban	paid	Male
master only (1)	1.10213	6	No	No	0	No Discrimination	Yes	No	Yes	Yes	No	No	No	No	3	Some Information	25-34	seconedu	rural	paid	Male
master only (1)	1.22335	24	No	No	0	No Discrimination	No	No	No	Yes	No	No	No	No	1	Some Information	35-49	seconedu	urban	paid	Male
master only (1)	1.42139	16	No	No	0	No Discrimination	No	No	No	Yes	No	No	No	No	1	Some Information	35-49	seconedu	rural	paid	Male
master only (1)	1.55346	24	No	No	0	No Discrimination	No	No	No	Yes	No	No	No	No	1	Some Information	50-54	primaryedu	urban	paid	Male
master only (1)	1.82329	22	No	No	0	No Discrimination	No	Yes	No	Yes	No	No	No	No	2	Some Information	25-34	seconedu	urban	paid	Male
master only (1)	2.56034	23	No	No	0	No Discrimination	No	No	No	Yes	No	No	No	No	1	Some Information	25-34	seconedu	rural	paid	Male
master only (1)	0.123242	59	No	No	0	No Discrimination	Yes	No	No	No	Yes	No	No	No	2	Some Information	35-49	seconedu	rural	paid	Male
master only (1)	0.150624	46	No	No	0	No Discrimination	Yes	No	No	Yes	No	No	No	No	2	Some Information	25-34	seconedu	urban	paid	Male
master only (1)	0.21601	1	No	No	0	No Discrimination	No	No	Yes	Yes	No	No	No	No	2	Some Information	35-49	highedu	urban	paid	Male
master only (1)	0.384213	44	No	No	0	No Discrimination	No	No	Yes	Yes	No	No	No	No	2	Some Information	35-49	seconedu	urban	paid	Male
master only (1)	0.49806	51	No	No	0	No Discrimination	No	No	No	Yes	No	No	No	No	1	Some Information	35-49	primaryedu	rural	paid	Male
master only (1)	0.517877	5	No	No	0	No Discrimination	No	No	No	Yes	No	No	No	No	1	Some Information	35-49	highedu	urban	paid	Male
master only (1)	0.92025	30	No	No	0	No Discrimination	Yes	No	No	Yes	No	No	No	No	2	Some Information	35-49	highedu	urban	paid	Male
master only (1)	0.986703	8	No	No	0	No Discrimination	No	No	No	Yes	No	No	No	No	1	Some Information	25-34	seconedu	rural	paid	Male
master only (1)	1.03209	11	No	No	0	No Discrimination	No	Yes	No	Yes	No	No	No	No	2	Some Information	35-49	highedu	urban	paid	Male
master only (1)	1.59915	24	No	No	0	No Discrimination	Yes	No	Yes	Yes	No	No	No	No	3	Some Information	35-49	highedu	urban	paid	Male
master only (1)	1.84253	25	No	No	0	No Discrimination	Yes	No	No	Yes	No	No	No	No	2	Some Information	35-49	highedu	rural	paid	Male
master only (1)	2.12781	22	No	No	0	No Discrimination	No	No	No	Yes	No	No	No	No	1	Some Information	35-49	primaryedu	urban	paid	Male
master only (1)	0.720866	52	No	No	0	No Discrimination	No	No	No	No	No	No	No	No	0	No Information	35-49	primaryedu	urban	paid	Male
master only (1)	1.29343	22	No	No	0	No Discrimination	No	No	No	Yes	No	No	No	No	1	Some Information	50-54	seconedu	urban	paid	Male
master only (1)	1.86853	25	No	No	0	No Discrimination	No	No	No	No	No	No	No	No	0	No Information	25-34	seconedu	rural	paid	Male
master only (1)	0.132078	59	No	No	0	No Discrimination	No	No	No	Yes	No	No	No	No	1	Some Information	35-49	seconedu	rural	paid	Male
master only (1)	0.429391	51	No	No	0	No Discrimination	No	No	No	Yes	No	No	No	No	1	Some Information	25-34	seconedu	rural	paid	Male
master only (1)	0.594991	51	No	No	0	No Discrimination	Yes	No	Yes	Yes	No	No	No	No	3	Some Information	25-34	highedu	rural	paid	Male
master only (1)	1.06747	5	No	No	0	No Discrimination	Yes	No	No	Yes	No	No	No	No	2	Some Information	35-49	highedu	urban	paid	Male
master only (1)	0.317538	57	No	No	0	No Discrimination	Yes	No	No	Yes	No	No	No	No	2	Some Information	25-34	highedu	rural	paid	Male
master only (1)	0.08223	60	No	No	0	No Discrimination	Yes	No	No	Yes	No	No	No	No	2	Some Information	35-49	seconedu	urban	paid	Male
master only (1)	0.157656	59	No	No	0	No Discrimination	No	No	No	No	No	No	No	No	0	No Information	25-34	highedu	rural	paid	Male
master only (1)	0.243679	50	No	No	0	No Discrimination	Yes	No	No	Yes	Yes	No	No	No	3	Some Information	35-49	highedu	urban	paid	Male
master only (1)	0.363417	50	No	No	0	No Discrimination	Yes	No	Yes	Yes	No	No	No	No	3	Some Information	50-54	highedu	urban	paid	Male
master only (1)	0.529238	51	No	No	0	No Discrimination	No	No	No	Yes	No	No	No	Yes	2	Some Information	25-34	highedu	rural	paid	Male
master only (1)	0.871995	51	No	No	0	No Discrimination	No	No	No	No	No	No	No	No	0	No Information	35-49	seconedu	rural	paid	Male
master only (1)	0.871995	51	No	No	0	No Discrimination	No	No	No	Yes	No	No	No	No	1	Some Information	50-54	seconedu	rural	paid	Male
master only (1)	1.12808	8	No	No	0	No Discrimination	No	No	No	Yes	No	No	No	No	1	Some Information	25-34	primaryedu	rural	paid	Male
master only (1)	0.134595	59	No	No	0	No Discrimination	No	No	No	No	No	No	No	Yes	1	Some Information	25-34	highedu	rural	paid	Male
master only (1)	0.141379	59	No	No	0	No Discrimination	No	No	No	No	No	No	No	Yes	1	Some Information	25-34	highedu	rural	paid	Male
master only (1)	0.145332	59	No	No	0	No Discrimination	No	No	No	Yes	No	No	No	No	1	Some Information	35-49	seconedu	rural	paid	Male
master only (1)	0.157439	59	No	No	0	No Discrimination	No	No	No	Yes	No	No	No	No	1	Some Information	35-49	primaryedu	rural	paid	Male
master only (1)	0.164657	59	No	No	0	No Discrimination	No	No	No	Yes	No	No	No	No	1	Some Information	35-49	seconedu	rural	paid	Male
master only (1)	0.17987	63	No	No	0	No Discrimination	No	No	No	Yes	No	No	No	No	1	Some Information	50-54	seconedu	rural	paid	Male
master only (1)	0.280774	37	No	No	0	No Discrimination	No	No	No	Yes	No	No	No	No	1	Some Information	25-34	seconedu	rural	paid	Male
master only (1)	0.320995	37	No	No	0	No Discrimination	No	Yes	No	No	Yes	No	No	No	2	Some Information	25-34	seconedu	rural	paid	Male
master only (1)	0.33967	37	No	No	0	No Discrimination	No	No	No	No	Yes	Yes	No	No	2	Some Information	25-34	seconedu	rural	paid	Male
master only (1)	0.340639	37	No	No	0	No Discrimination	No	No	Yes	No	Yes	No	No	No	2	Some Information	15-24	seconedu	rural	paid	Male
master only (1)	0.340639	37	No	No	0	No Discrimination	No	No	No	Yes	No	No	No	No	1	Some Information	35-49	primaryedu	rural	paid	Male
master only (1)	0.349436	37	No	No	0	No Discrimination	No	No	No	Yes	Yes	No	No	Yes	3	Some Information	50-54	seconedu	rural	paid	Male
master only (1)	0.349436	37	No	No	0	No Discrimination	No	Yes	No	No	Yes	Yes	No	No	3	Some Information	50-54	seconedu	rural	paid	Male
master only (1)	0.355811	37	No	No	0	No Discrimination	No	No	No	Yes	No	Yes	No	No	2	Some Information	50-54	seconedu	rural	paid	Male
master only (1)	0.387629	37	No	No	0	No Discrimination	No	No	Yes	No	Yes	No	No	Yes	3	Some Information	25-34	highedu	rural	paid	Male
master only (1)	0.456254	18	No	No	0	No Discrimination	No	No	No	Yes	No	No	No	No	1	Some Information	35-49	primaryedu	rural	paid	Male
master only (1)	0.464447	37	No	No	0	No Discrimination	No	No	No	Yes	Yes	No	No	No	2	Some Information	25-34	seconedu	rural	paid	Male
master only (1)	0.464447	37	No	No	0	No Discrimination	No	No	No	No	Yes	No	No	No	1	Some Information	50-54	noedu	rural	paid	Male
master only (1)	0.464447	37	No	No	0	No Discrimination	No	No	No	No	Yes	No	No	No	1	Some Information	35-49	primaryedu	rural	paid	Male
master only (1)	0.464447	37	No	No	0	No Discrimination	No	No	No	No	Yes	No	No	No	1	Some Information	35-49	seconedu	rural	paid	Male
master only (1)	2.22121	29	No	No	0	No Discrimination	No	No	No	Yes	No	No	No	No	1	Some Information	25-34	seconedu	rural	paid	Male
master only (1)	0.457258	2	No	No	0	No Discrimination	No	No	No	Yes	No	No	No	No	1	Some Information	35-49	primaryedu	rural	paid	Male
master only (1)	0.349436	37	No	No	0	No Discrimination	No	No	No	No	Yes	No	No	No	1	Some Information	25-34	seconedu	rural	paid	Male
master only (1)	0.914613	33	No	No	0	No Discrimination	No	No	No	Yes	No	No	No	No	1	Some Information	50-54	primaryedu	rural	paid	Male
master only (1)	1.1571	6	No	No	0	No Discrimination	No	No	No	No	No	No	No	No	0	No Information	35-49	seconedu	rural	paid	Male
master only (1)	0.297389	17	No	No	0	No Discrimination	Yes	No	No	Yes	No	No	No	No	2	Some Information	25-34	seconedu	urban	paid	Male
master only (1)	0.775434	53	No	No	0	No Discrimination	No	No	No	Yes	No	No	No	No	1	Some Information	35-49	primaryedu	rural	paid	Male
master only (1)	0.963245	21	No	No	0	No Discrimination	No	No	No	No	No	No	No	No	0	No Information	50-54	primaryedu	urban	paid	Male
master only (1)	1.58077	24	No	No	0	No Discrimination	No	Yes	No	Yes	Yes	No	No	No	3	Some Information	50-54	highedu	urban	paid	Male
master only (1)	2.23061	29	No	No	0	No Discrimination	Yes	No	No	Yes	No	No	No	No	2	Some Information	25-34	seconedu	rural	paid	Male
master only (1)	0.084531	46	No	No	0	No Discrimination	No	No	No	Yes	No	No	No	No	1	Some Information	25-34	highedu	urban	paid	Male
master only (1)	0.134595	59	No	No	0	No Discrimination	No	No	No	No	No	No	No	No	0	No Information	35-49	seconedu	rural	paid	Male
master only (1)	1.70535	28	No	No	0	No Discrimination	No	No	No	Yes	No	No	No	No	1	Some Information	25-34	primaryedu	urban	paid	Male
master only (1)	0.146163	59	No	No	0	No Discrimination	No	No	Yes	No	No	No	No	No	1	Some Information	25-34	seconedu	rural	paid	Male
master only (1)	0.312819	50	No	No	0	No Discrimination	No	No	No	No	Yes	Yes	No	No	2	Some Information	35-49	primaryedu	urban	paid	Male
master only (1)	0.313962	1	No	No	0	No Discrimination	Yes	No	Yes	Yes	No	No	No	No	3	Some Information	50-54	highedu	urban	paid	Male
master only (1)	0.365896	57	No	No	0	No Discrimination	No	No	No	No	No	No	No	No	0	No Information	50-54	primaryedu	rural	paid	Male
master only (1)	0.416771	2	No	No	0	No Discrimination	No	No	No	Yes	No	No	No	No	1	Some Information	35-49	seconedu	rural	paid	Male
master only (1)	0.507174	51	No	No	0	No Discrimination	No	Yes	No	Yes	No	No	No	No	2	Some Information	35-49	seconedu	rural	paid	Male
master only (1)	0.607522	48	No	No	0	No Discrimination	No	No	No	Yes	No	No	No	No	1	Some Information	35-49	seconedu	urban	paid	Male
master only (1)	1.0464	43	No	No	0	No Discrimination	No	No	No	Yes	No	No	No	No	1	Some Information	35-49	primaryedu	rural	paid	Male
master only (1)	1.05527	3	No	No	0	No Discrimination	No	No	Yes	Yes	No	No	No	No	2	Some Information	15-24	primaryedu	urban	paid	Male
master only (1)	1.08091	53	No	No	0	No Discrimination	No	No	No	No	Yes	No	No	No	1	Some Information	35-49	primaryedu	rural	paid	Male
master only (1)	1.41161	16	No	No	0	No Discrimination	No	No	No	Yes	No	No	No	No	1	Some Information	50-54	primaryedu	rural	paid	Male
master only (1)	1.43214	16	No	No	0	No Discrimination	No	No	No	Yes	No	No	No	No	1	Some Information	35-49	primaryedu	rural	paid	Male
master only (1)	1.78676	29	No	No	0	No Discrimination	No	No	No	No	No	No	No	No	0	No Information	35-49	primaryedu	rural	paid	Male
master only (1)	1.05392	41	No	No	0	No Discrimination	No	No	No	Yes	No	No	No	No	1	Some Information	25-34	primaryedu	rural	paid	Male
master only (1)	1.13877	38	No	No	0	No Discrimination	No	No	No	Yes	No	No	No	No	1	Some Information	35-49	seconedu	urban	paid	Male
master only (1)	0.789586	45	No	No	0	No Discrimination	No	No	No	No	No	No	No	No	0	No Information	35-49	seconedu	rural	paid	Male
master only (1)	0.973859	43	No	No	0	No Discrimination	No	No	No	Yes	No	No	No	No	1	Some Information	35-49	seconedu	rural	paid	Male
master only (1)	1.72692	22	No	No	0	No Discrimination	No	No	No	Yes	No	No	No	No	1	Some Information	35-49	seconedu	urban	paid	Male
master only (1)	1.88995	25	No	No	0	No Discrimination	No	No	No	Yes	No	No	No	No	1	Some Information	25-34	seconedu	rural	paid	Male
master only (1)	0.690329	40	No	No	0	No Discrimination	No	No	No	Yes	No	No	No	No	1	Some Information	35-49	primaryedu	urban	paid	Male
master only (1)	0.419678	55	No	No	0	No Discrimination	No	No	No	Yes	No	No	No	No	1	Some Information	15-24	seconedu	rural	paid	Male
master only (1)	1.10455	21	No	No	0	No Discrimination	No	No	Yes	Yes	Yes	No	No	No	3	Some Information	50-54	seconedu	urban	paid	Male
master only (1)	1.21584	30	No	No	0	No Discrimination	No	No	No	Yes	No	No	No	No	1	Some Information	35-49	seconedu	urban	paid	Male
master only (1)	0.138897	46	No	No	0	No Discrimination	No	No	No	No	No	No	No	No	0	No Information	35-49	primaryedu	urban	paid	Male
master only (1)	0.250689	56	No	No	0	No Discrimination	Yes	Yes	No	Yes	Yes	No	No	No	4	More Information	25-34	seconedu	urban	paid	Male
master only (1)	0.27458	65	No	No	0	No Discrimination	No	No	Yes	Yes	Yes	No	No	Yes	4	More Information	25-34	highedu	rural	paid	Male
master only (1)	1.40312	10	No	No	0	No Discrimination	No	Yes	Yes	Yes	No	No	No	No	3	Some Information	25-34	highedu	rural	paid	Male
master only (1)	1.67801	22	No	No	0	No Discrimination	No	No	Yes	Yes	No	No	No	No	2	Some Information	25-34	highedu	urban	paid	Male
master only (1)	1.90968	22	No	No	0	No Discrimination	No	No	No	Yes	No	No	No	Yes	2	Some Information	25-34	seconedu	urban	paid	Male
master only (1)	0.063091	47	No	No	0	No Discrimination	No	No	No	Yes	No	No	No	No	1	Some Information	35-49	seconedu	rural	paid	Male
master only (1)	0.281005	20	No	No	0	No Discrimination	No	No	No	No	No	No	No	No	0	No Information	25-34	primaryedu	rural	paid	Male
master only (1)	0.375021	50	No	No	0	No Discrimination	Yes	No	No	Yes	No	No	No	No	2	Some Information	35-49	highedu	urban	paid	Male
master only (1)	0.55244	34	No	No	0	No Discrimination	No	Yes	No	Yes	No	No	No	No	2	Some Information	35-49	seconedu	urban	paid	Male
master only (1)	0.905287	41	No	No	0	No Discrimination	No	No	No	Yes	No	No	No	No	1	Some Information	35-49	primaryedu	rural	paid	Male
master only (1)	0.988262	3	No	No	0	No Discrimination	No	No	No	Yes	No	No	No	No	1	Some Information	25-34	seconedu	urban	paid	Male
master only (1)	1.03111	21	No	No	0	No Discrimination	No	No	No	Yes	Yes	No	No	No	2	Some Information	35-49	primaryedu	urban	paid	Male
master only (1)	1.04273	30	No	No	0	No Discrimination	No	No	No	Yes	No	No	No	No	1	Some Information	35-49	primaryedu	urban	paid	Male
master only (1)	1.44112	43	No	No	0	No Discrimination	No	No	No	Yes	No	No	No	No	1	Some Information	25-34	primaryedu	rural	paid	Male
master only (1)	1.72889	25	No	No	0	No Discrimination	No	No	No	Yes	No	No	No	No	1	Some Information	15-24	seconedu	rural	paid	Male
master only (1)	1.75593	24	No	No	0	No Discrimination	No	No	Yes	Yes	No	No	No	No	2	Some Information	35-49	seconedu	urban	paid	Male
master only (1)	1.85901	24	No	No	0	No Discrimination	No	No	No	Yes	No	No	No	No	1	Some Information	35-49	primaryedu	urban	paid	Male
master only (1)	1.85901	24	No	No	0	No Discrimination	No	No	Yes	Yes	No	No	No	No	2	Some Information	35-49	seconedu	urban	paid	Male
master only (1)	1.95737	25	No	No	0	No Discrimination	No	No	No	Yes	No	No	No	No	1	Some Information	50-54	seconedu	rural	paid	Male
master only (1)	1.98247	25	No	No	0	No Discrimination	No	No	No	Yes	No	No	No	No	1	Some Information	35-49	primaryedu	rural	paid	Male
master only (1)	2.07394	29	No	No	0	No Discrimination	No	No	No	Yes	No	No	No	No	1	Some Information	35-49	primaryedu	rural	paid	Male
master only (1)	2.11574	25	No	No	0	No Discrimination	Yes	No	No	Yes	No	No	No	No	2	Some Information	25-34	seconedu	rural	paid	Male
master only (1)	2.16067	25	No	No	0	No Discrimination	No	Yes	Yes	Yes	No	No	No	No	3	Some Information	35-49	seconedu	rural	paid	Male
master only (1)	2.39636	29	No	No	0	No Discrimination	No	No	No	Yes	No	No	No	No	1	Some Information	25-34	seconedu	rural	paid	Male
master only (1)	1.18731	12	No	No	0	No Discrimination	No	No	No	Yes	No	No	No	No	1	Some Information	35-49	seconedu	rural	paid	Male
master only (1)	1.37957	31	No	No	0	No Discrimination	No	No	No	Yes	No	No	No	No	1	Some Information	25-34	seconedu	rural	paid	Male
master only (1)	1.4467	11	No	No	0	No Discrimination	Yes	Yes	No	Yes	Yes	No	No	No	4	More Information	25-34	seconedu	urban	paid	Male
master only (1)	0.382522	19	No	No	0	No Discrimination	No	Yes	Yes	Yes	No	Yes	No	No	4	More Information	35-49	seconedu	urban	paid	Male
master only (1)	0.49806	51	No	No	0	No Discrimination	No	No	Yes	Yes	No	No	No	No	2	Some Information	35-49	seconedu	rural	paid	Male
master only (1)	0.842107	11	No	No	0	No Discrimination	Yes	Yes	Yes	Yes	No	No	No	Yes	5	More Information	35-49	highedu	urban	paid	Male
master only (1)	1.06747	5	No	No	0	No Discrimination	Yes	No	Yes	Yes	No	No	No	No	3	Some Information	35-49	highedu	urban	paid	Male
master only (1)	1.28631	33	No	No	0	No Discrimination	No	No	No	Yes	No	No	No	No	1	Some Information	25-34	seconedu	rural	paid	Male
master only (1)	1.30895	4	No	No	0	No Discrimination	Yes	No	Yes	Yes	No	No	No	No	3	Some Information	25-34	highedu	rural	paid	Male
master only (1)	1.33293	16	No	No	0	No Discrimination	No	No	No	Yes	Yes	No	No	Yes	3	Some Information	25-34	seconedu	rural	paid	Male
master only (1)	1.41733	22	No	No	0	No Discrimination	No	No	No	Yes	No	No	No	No	1	Some Information	25-34	seconedu	urban	paid	Male
master only (1)	1.49003	16	No	No	0	No Discrimination	No	No	No	Yes	No	No	No	No	1	Some Information	35-49	primaryedu	rural	paid	Male
master only (1)	0.295635	44	No	No	0	No Discrimination	No	Yes	Yes	Yes	No	No	No	No	3	Some Information	35-49	seconedu	urban	paid	Male
master only (1)	0.333585	1	No	No	0	No Discrimination	Yes	No	Yes	Yes	No	No	No	No	3	Some Information	35-49	highedu	urban	paid	Male
master only (1)	0.361028	44	No	No	0	No Discrimination	No	No	Yes	Yes	No	No	No	No	2	Some Information	35-49	seconedu	urban	paid	Male
master only (1)	0.398343	52	No	No	0	No Discrimination	No	No	No	No	No	No	No	No	0	No Information	35-49	highedu	urban	paid	Male
master only (1)	0.432313	14	No	No	0	No Discrimination	No	No	No	Yes	No	No	No	No	1	Some Information	25-34	seconedu	rural	paid	Male
master only (1)	0.619781	48	No	No	0	No Discrimination	No	No	Yes	Yes	No	No	No	No	2	Some Information	35-49	seconedu	urban	paid	Male
master only (1)	0.815534	66	No	No	0	No Discrimination	Yes	No	Yes	No	No	No	No	Yes	3	Some Information	25-34	seconedu	urban	paid	Male
master only (1)	0.858505	42	No	No	0	No Discrimination	No	No	No	Yes	No	No	No	No	1	Some Information	25-34	seconedu	urban	paid	Male
master only (1)	0.875613	49	No	No	0	No Discrimination	No	No	No	Yes	No	No	No	No	1	Some Information	25-34	highedu	rural	paid	Male
master only (1)	0.880539	67	No	No	0	No Discrimination	No	No	No	No	No	No	No	No	0	No Information	25-34	seconedu	rural	paid	Male
master only (1)	1.03951	30	No	No	0	No Discrimination	Yes	Yes	Yes	Yes	No	No	No	No	4	More Information	35-49	highedu	urban	paid	Male
master only (1)	1.0461	30	No	No	0	No Discrimination	No	No	Yes	Yes	No	No	No	No	2	Some Information	35-49	seconedu	urban	paid	Male
master only (1)	1.06983	45	No	No	0	No Discrimination	No	Yes	Yes	Yes	No	No	No	No	3	Some Information	35-49	primaryedu	rural	paid	Male
master only (1)	1.0881	4	No	No	0	No Discrimination	No	No	No	Yes	No	No	No	No	1	Some Information	15-24	primaryedu	rural	paid	Male
master only (1)	1.38656	22	No	No	0	No Discrimination	No	No	No	Yes	No	No	No	No	1	Some Information	35-49	seconedu	urban	paid	Male
master only (1)	1.39512	30	No	No	0	No Discrimination	No	No	No	Yes	No	No	No	No	1	Some Information	35-49	seconedu	urban	paid	Male
master only (1)	1.47375	43	No	No	0	No Discrimination	No	No	No	Yes	No	No	No	No	1	Some Information	25-34	seconedu	rural	paid	Male
master only (1)	1.52169	28	No	No	0	No Discrimination	No	No	Yes	Yes	No	No	No	No	2	Some Information	35-49	seconedu	urban	paid	Male
master only (1)	1.70535	28	No	No	0	No Discrimination	No	No	Yes	Yes	No	Yes	No	No	3	Some Information	35-49	seconedu	urban	paid	Male
master only (1)	1.79027	21	No	No	0	No Discrimination	No	No	No	Yes	No	No	No	No	1	Some Information	50-54	primaryedu	urban	paid	Male
master only (1)	2.13351	25	No	No	0	No Discrimination	Yes	Yes	Yes	Yes	Yes	No	No	Yes	6	More Information	25-34	seconedu	rural	paid	Male
master only (1)	2.39336	23	No	No	0	No Discrimination	No	Yes	Yes	Yes	No	No	No	No	3	Some Information	50-54	highedu	rural	paid	Male
master only (1)	2.56034	23	No	No	0	No Discrimination	No	No	Yes	Yes	No	No	No	No	2	Some Information	25-34	seconedu	rural	paid	Male
master only (1)	0.152521	61	No	No	0	No Discrimination	No	No	Yes	Yes	No	Yes	No	No	3	Some Information	35-49	seconedu	rural	paid	Male
master only (1)	1.37957	31	No	No	0	No Discrimination	No	Yes	No	Yes	No	No	No	No	2	Some Information	35-49	seconedu	rural	paid	Male
master only (1)	0.491195	2	No	No	0	No Discrimination	No	No	No	Yes	No	No	No	No	1	Some Information	35-49	primaryedu	rural	paid	Male
master only (1)	0.135183	65	No	No	0	No Discrimination	No	No	Yes	Yes	Yes	Yes	No	Yes	5	More Information	35-49	highedu	rural	paid	Male
master only (1)	1.21441	33	No	No	0	No Discrimination	No	No	No	Yes	No	No	No	No	1	Some Information	35-49	primaryedu	rural	paid	Male
master only (1)	1.89031	29	No	No	0	No Discrimination	Yes	No	No	No	No	No	No	No	1	Some Information	25-34	primaryedu	rural	paid	Male
master only (1)	0.426235	37	No	No	0	No Discrimination	No	No	No	No	Yes	No	No	No	1	Some Information	25-34	primaryedu	rural	paid	Male
master only (1)	2.08835	29	No	No	0	No Discrimination	No	No	No	Yes	No	No	No	No	1	Some Information	35-49	primaryedu	rural	paid	Male
master only (1)	1.56021	28	No	No	0	No Discrimination	No	No	No	Yes	No	No	No	No	1	Some Information	50-54	seconedu	urban	paid	Male
master only (1)	0.61687	52	No	No	0	No Discrimination	No	No	No	Yes	No	No	No	No	1	Some Information	35-49	primaryedu	urban	paid	Male
master only (1)	1.02892	10	No	No	0	No Discrimination	No	No	No	No	No	No	No	No	0	No Information	25-34	primaryedu	rural	paid	Male
master only (1)	1.15172	6	No	No	0	No Discrimination	Yes	Yes	No	Yes	No	No	No	No	3	Some Information	15-24	seconedu	rural	paid	Male
master only (1)	1.51685	29	No	No	0	No Discrimination	Yes	No	Yes	Yes	Yes	No	No	Yes	5	More Information	25-34	highedu	rural	paid	Male
master only (1)	0.97767	15	No	No	0	No Discrimination	Yes	No	No	Yes	No	No	No	Yes	3	Some Information	25-34	highedu	urban	paid	Male
master only (1)	0.059295	59	No	No	0	No Discrimination	No	No	No	Yes	No	No	No	Yes	2	Some Information	35-49	seconedu	rural	paid	Male
master only (1)	0.129098	60	No	No	0	No Discrimination	Yes	No	Yes	Yes	Yes	No	No	No	4	More Information	35-49	seconedu	urban	paid	Male
master only (1)	0.172527	17	No	No	0	No Discrimination	No	No	Yes	Yes	Yes	No	No	No	3	Some Information	50-54	seconedu	urban	paid	Male
master only (1)	0.184295	54	No	No	0	No Discrimination	Yes	No	No	Yes	No	No	No	No	2	Some Information	35-49	highedu	urban	paid	Male
master only (1)	0.193922	54	No	No	0	No Discrimination	No	No	No	No	No	No	No	No	0	No Information	25-34	seconedu	urban	paid	Male
master only (1)	0.2062	61	No	No	0	No Discrimination	No	No	No	Yes	No	No	No	Yes	2	Some Information	25-34	seconedu	rural	paid	Male
master only (1)	0.259959	19	No	No	0	No Discrimination	Yes	No	Yes	Yes	No	No	No	No	3	Some Information	35-49	seconedu	urban	paid	Male
master only (1)	0.280561	55	No	No	0	No Discrimination	Yes	No	Yes	Yes	Yes	No	No	Yes	5	More Information	35-49	seconedu	rural	paid	Male
master only (1)	0.281005	20	No	No	0	No Discrimination	No	No	No	Yes	No	No	No	No	1	Some Information	35-49	primaryedu	rural	paid	Male
master only (1)	0.285998	13	No	No	0	No Discrimination	No	No	Yes	Yes	No	No	No	No	2	Some Information	50-54	seconedu	urban	paid	Male
master only (1)	0.37754	55	No	No	0	No Discrimination	No	No	No	Yes	No	No	No	No	1	Some Information	25-34	seconedu	rural	paid	Male
master only (1)	0.409688	44	No	No	0	No Discrimination	Yes	Yes	Yes	Yes	No	No	No	No	4	More Information	35-49	seconedu	urban	paid	Male
master only (1)	0.45676	14	No	No	0	No Discrimination	No	No	No	Yes	Yes	No	No	No	2	Some Information	35-49	seconedu	rural	paid	Male
master only (1)	0.45676	14	No	No	0	No Discrimination	No	No	No	Yes	No	No	No	No	1	Some Information	35-49	primaryedu	rural	paid	Male
master only (1)	0.551766	13	No	No	0	No Discrimination	No	No	No	No	Yes	No	No	No	1	Some Information	35-49	seconedu	urban	paid	Male
master only (1)	0.630012	38	No	No	0	No Discrimination	Yes	Yes	No	Yes	No	No	No	No	3	Some Information	50-54	seconedu	urban	paid	Male
master only (1)	0.778023	32	No	No	0	No Discrimination	No	No	No	Yes	No	Yes	No	No	2	Some Information	35-49	seconedu	urban	paid	Male
master only (1)	0.784364	26	No	No	0	No Discrimination	No	No	Yes	Yes	No	No	No	Yes	3	Some Information	35-49	seconedu	urban	paid	Male
master only (1)	0.803115	66	No	No	0	No Discrimination	Yes	No	Yes	Yes	No	No	No	No	3	Some Information	50-54	seconedu	urban	no paid	Male
master only (1)	0.810982	15	No	No	0	No Discrimination	Yes	No	No	Yes	No	No	No	No	2	Some Information	35-49	highedu	urban	paid	Male
master only (1)	0.815534	66	No	No	0	No Discrimination	No	Yes	Yes	Yes	No	No	No	No	3	Some Information	25-34	highedu	urban	paid	Male
master only (1)	0.864486	35	No	No	0	No Discrimination	No	No	No	Yes	No	No	No	No	1	Some Information	25-34	seconedu	rural	paid	Male
master only (1)	0.870147	26	No	No	0	No Discrimination	Yes	No	Yes	Yes	No	No	No	No	3	Some Information	50-54	seconedu	urban	paid	Male
master only (1)	0.913068	3	No	No	0	No Discrimination	No	No	No	Yes	No	No	No	No	1	Some Information	50-54	seconedu	urban	paid	Male
master only (1)	0.967742	15	No	No	0	No Discrimination	Yes	No	No	Yes	No	No	No	No	2	Some Information	25-34	seconedu	urban	paid	Male
master only (1)	1.00777	39	No	No	0	No Discrimination	No	No	No	Yes	No	No	No	No	1	Some Information	50-54	seconedu	rural	paid	Male
master only (1)	1.01528	53	No	No	0	No Discrimination	No	No	No	No	No	No	No	No	0	No Information	35-49	primaryedu	rural	paid	Male
master only (1)	1.04225	45	No	No	0	No Discrimination	Yes	No	Yes	Yes	No	No	No	No	3	Some Information	25-34	highedu	rural	paid	Male
master only (1)	1.06983	45	No	No	0	No Discrimination	No	No	Yes	Yes	No	No	No	No	2	Some Information	35-49	seconedu	rural	paid	Male
master only (1)	1.11669	26	No	No	0	No Discrimination	Yes	Yes	No	Yes	No	No	No	No	3	Some Information	35-49	highedu	urban	paid	Male
master only (1)	1.15058	6	No	No	0	No Discrimination	No	Yes	No	Yes	Yes	No	No	No	3	Some Information	35-49	primaryedu	rural	paid	Male
master only (1)	1.18418	30	No	No	0	No Discrimination	Yes	Yes	Yes	Yes	No	No	No	No	4	More Information	25-34	seconedu	urban	paid	Male
master only (1)	1.24736	21	No	No	0	No Discrimination	Yes	Yes	Yes	Yes	No	No	No	No	4	More Information	35-49	highedu	urban	paid	Male
master only (1)	1.31327	16	No	No	0	No Discrimination	No	No	No	Yes	No	No	No	No	1	Some Information	35-49	seconedu	rural	paid	Male
master only (1)	1.32729	32	No	No	0	No Discrimination	No	No	No	No	Yes	No	No	No	1	Some Information	50-54	highedu	urban	paid	Male
master only (1)	1.34513	22	No	No	0	No Discrimination	No	No	Yes	Yes	No	No	No	No	2	Some Information	35-49	seconedu	urban	paid	Male
master only (1)	1.35586	16	No	No	0	No Discrimination	No	No	No	Yes	No	No	No	No	1	Some Information	35-49	primaryedu	rural	paid	Male
master only (1)	1.37407	22	No	No	0	No Discrimination	No	No	No	Yes	No	No	No	Yes	2	Some Information	25-34	seconedu	urban	paid	Male
master only (1)	1.4132	16	No	No	0	No Discrimination	No	No	No	Yes	No	No	No	No	1	Some Information	50-54	primaryedu	rural	paid	Male
master only (1)	1.42139	16	No	No	0	No Discrimination	No	No	No	No	No	No	No	No	0	No Information	35-49	primaryedu	rural	paid	Male
master only (1)	1.48457	16	No	No	0	No Discrimination	No	No	No	Yes	No	No	No	No	1	Some Information	35-49	seconedu	rural	paid	Male
master only (1)	1.50376	12	No	No	0	No Discrimination	No	No	No	Yes	No	No	No	No	1	Some Information	35-49	primaryedu	rural	paid	Male
master only (1)	1.53103	22	No	No	0	No Discrimination	No	No	Yes	Yes	No	No	No	No	2	Some Information	35-49	seconedu	urban	paid	Male
master only (1)	1.60696	28	No	No	0	No Discrimination	No	Yes	No	Yes	Yes	No	No	No	3	Some Information	35-49	seconedu	urban	paid	Male
master only (1)	1.73635	28	No	No	0	No Discrimination	Yes	Yes	Yes	No	No	No	No	No	3	Some Information	25-34	highedu	urban	paid	Male
master only (1)	1.80567	29	No	No	0	No Discrimination	No	Yes	No	Yes	No	No	No	No	2	Some Information	35-49	seconedu	rural	paid	Male
master only (1)	1.95887	25	No	No	0	No Discrimination	No	Yes	No	Yes	No	No	No	No	2	Some Information	35-49	highedu	rural	paid	Male
master only (1)	2.00401	25	No	No	0	No Discrimination	No	No	No	No	No	Yes	No	No	1	Some Information	35-49	seconedu	rural	no paid	Male
master only (1)	2.07394	29	No	No	0	No Discrimination	No	No	Yes	Yes	No	No	No	No	2	Some Information	35-49	seconedu	rural	paid	Male
master only (1)	2.07394	29	No	No	0	No Discrimination	No	Yes	No	Yes	No	No	No	No	2	Some Information	35-49	seconedu	rural	paid	Male
master only (1)	2.08585	24	No	No	0	No Discrimination	Yes	No	Yes	Yes	No	No	No	Yes	4	More Information	35-49	seconedu	urban	paid	Male
master only (1)	2.0901	29	No	No	0	No Discrimination	No	No	No	Yes	No	No	No	No	1	Some Information	35-49	seconedu	rural	paid	Male
master only (1)	2.13876	29	No	No	0	No Discrimination	No	No	No	No	Yes	No	No	No	1	Some Information	50-54	primaryedu	rural	paid	Male
master only (1)	2.18736	29	No	No	0	No Discrimination	No	No	No	Yes	No	No	No	No	1	Some Information	50-54	primaryedu	rural	paid	Male
master only (1)	2.54922	29	No	No	0	No Discrimination	No	No	No	Yes	No	No	No	No	1	Some Information	25-34	seconedu	rural	paid	Male
master only (1)	0.34525	14	No	No	0	No Discrimination	No	No	No	No	Yes	Yes	No	No	2	Some Information	35-49	seconedu	rural	paid	Male
master only (1)	0.888037	15	No	No	0	No Discrimination	No	No	Yes	Yes	No	Yes	No	No	3	Some Information	35-49	highedu	urban	paid	Male
master only (1)	0.897643	39	No	No	0	No Discrimination	No	No	Yes	Yes	No	No	No	No	2	Some Information	25-34	seconedu	rural	paid	Male
master only (1)	1.32729	32	No	No	0	No Discrimination	No	No	No	No	No	Yes	No	No	1	Some Information	35-49	seconedu	urban	paid	Male
master only (1)	1.32988	22	No	No	0	No Discrimination	No	No	No	Yes	No	No	No	No	1	Some Information	25-34	seconedu	urban	paid	Male
master only (1)	1.54838	24	No	No	0	No Discrimination	No	No	Yes	Yes	No	No	No	No	2	Some Information	35-49	primaryedu	urban	paid	Male
master only (1)	2.95557	23	No	No	0	No Discrimination	No	No	No	Yes	No	No	No	No	1	Some Information	25-34	primaryedu	rural	paid	Male
master only (1)	0.277323	44	No	No	0	No Discrimination	No	No	No	Yes	Yes	No	No	No	2	Some Information	35-49	seconedu	urban	paid	Male
master only (1)	0.362336	2	No	No	0	No Discrimination	No	No	No	Yes	Yes	No	No	No	2	Some Information	50-54	seconedu	rural	paid	Male
master only (1)	0.214131	63	No	No	0	No Discrimination	Yes	No	No	No	No	No	No	No	1	Some Information	25-34	highedu	rural	paid	Male
master only (1)	0.217151	65	No	No	0	No Discrimination	No	Yes	Yes	Yes	Yes	No	No	No	4	More Information	35-49	highedu	rural	paid	Male
master only (1)	0.322589	55	No	No	0	No Discrimination	Yes	No	No	Yes	Yes	No	No	No	3	Some Information	35-49	highedu	rural	paid	Male
master only (1)	0.323612	65	No	No	0	No Discrimination	No	No	No	Yes	No	No	No	No	1	Some Information	50-54	seconedu	rural	no paid	Male
master only (1)	0.323612	65	No	No	0	No Discrimination	No	No	No	No	No	Yes	No	No	1	Some Information	35-49	seconedu	rural	no paid	Male
master only (1)	0.323936	13	No	No	0	No Discrimination	No	No	No	Yes	Yes	No	No	No	2	Some Information	25-34	primaryedu	urban	paid	Male
master only (1)	0.339068	13	No	No	0	No Discrimination	No	No	No	Yes	Yes	No	No	No	2	Some Information	25-34	seconedu	urban	no paid	Male
master only (1)	0.357713	55	No	No	0	No Discrimination	No	No	Yes	Yes	No	No	No	No	2	Some Information	35-49	seconedu	rural	paid	Male
master only (1)	0.357713	55	No	No	0	No Discrimination	No	No	No	Yes	No	No	No	No	1	Some Information	25-34	primaryedu	rural	paid	Male
master only (1)	0.443812	13	No	No	0	No Discrimination	Yes	Yes	Yes	Yes	No	No	No	No	4	More Information	35-49	seconedu	urban	paid	Male
master only (1)	0.564278	21	No	No	0	No Discrimination	No	No	No	Yes	No	No	No	No	1	Some Information	25-34	seconedu	urban	paid	Male
master only (1)	0.855234	21	No	No	0	No Discrimination	No	No	No	Yes	No	No	No	No	1	Some Information	25-34	seconedu	urban	paid	Male
master only (1)	0.883969	15	No	No	0	No Discrimination	No	No	No	Yes	No	No	No	No	1	Some Information	35-49	seconedu	urban	paid	Male
master only (1)	1.01255	28	No	No	0	No Discrimination	No	No	Yes	Yes	No	No	No	No	2	Some Information	50-54	seconedu	urban	paid	Male
master only (1)	1.14792	43	No	No	0	No Discrimination	No	No	No	Yes	Yes	No	No	No	2	Some Information	35-49	seconedu	rural	paid	Male
master only (1)	1.22113	30	No	No	0	No Discrimination	No	No	No	Yes	No	No	No	No	1	Some Information	35-49	seconedu	urban	paid	Male
master only (1)	1.40312	10	No	No	0	No Discrimination	No	No	No	Yes	No	No	No	No	1	Some Information	50-54	primaryedu	rural	paid	Male
master only (1)	1.49003	16	No	No	0	No Discrimination	No	No	No	Yes	No	No	No	No	1	Some Information	50-54	seconedu	rural	paid	Male
master only (1)	1.64761	24	No	No	0	No Discrimination	Yes	No	No	Yes	No	No	No	No	2	Some Information	35-49	highedu	urban	paid	Male
master only (1)	1.88251	25	No	No	0	No Discrimination	No	Yes	No	Yes	No	No	No	No	2	Some Information	35-49	primaryedu	rural	paid	Male
master only (1)	2.10637	25	No	No	0	No Discrimination	No	No	No	Yes	No	No	No	No	1	Some Information	25-34	seconedu	rural	paid	Male
master only (1)	2.50602	29	No	No	0	No Discrimination	No	No	No	Yes	Yes	No	No	No	2	Some Information	50-54	seconedu	rural	paid	Male
master only (1)	3.62557	22	No	No	0	No Discrimination	Yes	No	No	Yes	No	No	No	No	2	Some Information	35-49	seconedu	urban	paid	Male
master only (1)	0.46286	14	No	No	0	No Discrimination	No	No	Yes	Yes	No	No	No	No	2	Some Information	35-49	primaryedu	rural	paid	Male
master only (1)	0.46286	14	No	No	0	No Discrimination	No	No	No	Yes	No	No	No	No	1	Some Information	50-54	primaryedu	rural	paid	Male
master only (1)	0.712875	39	No	No	0	No Discrimination	No	No	No	Yes	No	No	No	No	1	Some Information	35-49	highedu	rural	paid	Male
master only (1)	0.858505	42	No	No	0	No Discrimination	No	No	No	Yes	No	No	No	No	1	Some Information	25-34	seconedu	urban	paid	Male
master only (1)	0.933118	32	No	No	0	No Discrimination	Yes	No	No	Yes	No	No	No	No	2	Some Information	35-49	seconedu	urban	paid	Male
master only (1)	1.10469	10	No	No	0	No Discrimination	No	No	No	No	Yes	No	No	No	1	Some Information	35-49	seconedu	rural	paid	Male
master only (1)	1.15213	6	No	No	0	No Discrimination	No	No	No	No	No	No	No	No	0	No Information	35-49	primaryedu	rural	paid	Male
master only (1)	1.20301	30	No	No	0	No Discrimination	No	No	No	Yes	No	No	No	No	1	Some Information	25-34	seconedu	urban	paid	Male
master only (1)	1.42139	16	No	No	0	No Discrimination	No	No	No	Yes	No	No	No	No	1	Some Information	35-49	primaryedu	rural	paid	Male
master only (1)	1.95887	25	No	No	0	No Discrimination	Yes	No	No	Yes	No	No	No	No	2	Some Information	35-49	seconedu	rural	paid	Male
master only (1)	2.51147	23	No	No	0	No Discrimination	No	Yes	Yes	Yes	No	No	No	No	3	Some Information	25-34	seconedu	rural	paid	Male
master only (1)	0.296534	17	No	No	0	No Discrimination	No	No	No	No	No	Yes	No	No	1	Some Information	25-34	seconedu	urban	paid	Male
master only (1)	0.344269	19	No	No	0	No Discrimination	Yes	No	No	Yes	No	No	No	No	2	Some Information	35-49	seconedu	urban	paid	Male
master only (1)	1.07652	22	No	No	0	No Discrimination	Yes	No	Yes	Yes	No	No	No	No	3	Some Information	35-49	highedu	urban	paid	Male
master only (1)	1.33405	22	No	No	0	No Discrimination	No	No	Yes	Yes	No	No	No	No	2	Some Information	35-49	primaryedu	urban	paid	Male
master only (1)	1.39215	33	No	No	0	No Discrimination	Yes	No	No	Yes	Yes	No	No	No	3	Some Information	25-34	highedu	rural	paid	Male
master only (1)	1.57724	24	No	No	0	No Discrimination	No	Yes	Yes	Yes	No	No	No	No	3	Some Information	35-49	seconedu	urban	paid	Male
master only (1)	1.95737	25	No	No	0	No Discrimination	No	No	Yes	Yes	No	Yes	No	No	3	Some Information	35-49	primaryedu	rural	paid	Male
master only (1)	0.232175	63	No	No	0	No Discrimination	No	No	Yes	Yes	No	No	No	No	2	Some Information	35-49	highedu	rural	paid	Male
master only (1)	0.439098	17	No	No	0	No Discrimination	No	No	Yes	Yes	No	No	No	No	2	Some Information	35-49	seconedu	urban	paid	Male
master only (1)	1.0022	53	No	No	0	No Discrimination	No	No	No	Yes	No	No	No	No	1	Some Information	35-49	highedu	rural	paid	Male
master only (1)	1.89031	29	No	No	0	No Discrimination	No	No	No	Yes	No	No	No	No	1	Some Information	35-49	noedu	rural	paid	Male
master only (1)	0.125317	58	No	No	0	No Discrimination	No	No	Yes	Yes	No	Yes	No	No	3	Some Information	35-49	seconedu	urban	paid	Male
master only (1)	0.128884	60	No	No	0	No Discrimination	No	No	Yes	Yes	No	Yes	No	Yes	4	More Information	35-49	seconedu	urban	paid	Male
master only (1)	0.137563	58	No	No	0	No Discrimination	No	No	No	Yes	No	No	No	No	1	Some Information	35-49	seconedu	urban	paid	Male
master only (1)	0.138437	59	No	No	0	No Discrimination	Yes	Yes	No	Yes	No	No	No	No	3	Some Information	35-49	highedu	rural	paid	Male
master only (1)	0.172527	17	No	No	0	No Discrimination	No	No	No	Yes	Yes	Yes	No	No	3	Some Information	35-49	seconedu	urban	paid	Male
master only (1)	0.180748	61	No	No	0	No Discrimination	No	No	No	Yes	No	No	No	No	1	Some Information	25-34	seconedu	rural	no paid	Male
master only (1)	0.18185	65	No	No	0	No Discrimination	No	Yes	No	Yes	Yes	No	No	No	3	Some Information	50-54	seconedu	rural	paid	Male
master only (1)	0.264371	55	No	No	0	No Discrimination	Yes	No	Yes	Yes	No	No	No	No	3	Some Information	50-54	highedu	rural	paid	Male
master only (1)	0.277333	36	No	No	0	No Discrimination	Yes	No	No	Yes	No	No	No	No	2	Some Information	35-49	highedu	urban	paid	Male
master only (1)	0.289182	19	No	No	0	No Discrimination	No	No	No	Yes	No	No	No	No	1	Some Information	35-49	primaryedu	urban	paid	Male
master only (1)	0.296534	17	No	No	0	No Discrimination	No	No	No	Yes	No	No	No	No	1	Some Information	35-49	seconedu	urban	paid	Male
master only (1)	0.297389	17	No	No	0	No Discrimination	No	No	No	Yes	No	No	No	No	1	Some Information	50-54	primaryedu	urban	paid	Male
master only (1)	0.307555	50	No	No	0	No Discrimination	Yes	No	Yes	Yes	No	No	No	No	3	Some Information	35-49	highedu	urban	paid	Male
master only (1)	0.346023	13	No	No	0	No Discrimination	No	No	No	No	No	No	No	No	0	No Information	25-34	highedu	urban	paid	Male
master only (1)	0.374508	14	No	No	0	No Discrimination	No	No	No	No	No	No	Yes	No	1	Some Information	25-34	highedu	rural	paid	Male
master only (1)	0.385883	14	No	No	0	No Discrimination	No	No	No	Yes	No	No	No	No	1	Some Information	25-34	primaryedu	rural	paid	Male
master only (1)	0.418646	40	No	No	0	No Discrimination	No	Yes	Yes	Yes	No	No	No	No	3	Some Information	35-49	seconedu	urban	paid	Male
master only (1)	0.444365	44	No	No	0	No Discrimination	No	No	Yes	Yes	No	No	No	No	2	Some Information	35-49	seconedu	urban	paid	Male
master only (1)	0.451726	14	No	No	0	No Discrimination	No	No	No	Yes	No	No	No	No	1	Some Information	35-49	seconedu	rural	paid	Male
master only (1)	0.461623	44	No	No	0	No Discrimination	No	No	No	Yes	No	No	No	No	1	Some Information	35-49	primaryedu	urban	no paid	Male
master only (1)	0.472768	51	No	No	0	No Discrimination	No	No	No	Yes	No	No	No	No	1	Some Information	35-49	seconedu	rural	paid	Male
master only (1)	0.476968	14	No	No	0	No Discrimination	No	No	Yes	Yes	No	No	No	No	2	Some Information	35-49	seconedu	rural	paid	Male
master only (1)	0.63669	42	No	No	0	No Discrimination	No	No	No	Yes	Yes	Yes	No	No	3	Some Information	35-49	seconedu	urban	paid	Male
master only (1)	0.685179	52	No	No	0	No Discrimination	Yes	No	Yes	Yes	No	No	No	Yes	4	More Information	35-49	highedu	urban	paid	Male
master only (1)	0.745159	44	No	No	0	No Discrimination	No	Yes	No	Yes	No	No	No	No	2	Some Information	25-34	seconedu	urban	paid	Male
master only (1)	0.790951	38	No	No	0	No Discrimination	No	No	No	Yes	No	No	No	No	1	Some Information	35-49	primaryedu	urban	paid	Male
master only (1)	0.790951	38	No	No	0	No Discrimination	Yes	No	No	Yes	No	No	No	No	2	Some Information	35-49	seconedu	urban	paid	Male
master only (1)	0.797314	30	No	No	0	No Discrimination	Yes	No	Yes	Yes	No	No	No	No	3	Some Information	35-49	highedu	urban	paid	Male
master only (1)	0.834393	35	No	No	0	No Discrimination	No	No	Yes	Yes	No	Yes	No	No	3	Some Information	50-54	seconedu	rural	paid	Male
master only (1)	0.838532	3	No	No	0	No Discrimination	No	No	Yes	Yes	No	No	No	No	2	Some Information	35-49	seconedu	urban	paid	Male
master only (1)	0.855234	21	No	No	0	No Discrimination	No	No	No	Yes	No	No	No	No	1	Some Information	35-49	seconedu	urban	paid	Male
master only (1)	0.858019	35	No	No	0	No Discrimination	No	No	No	Yes	Yes	No	No	No	2	Some Information	35-49	highedu	rural	paid	Male
master only (1)	0.878629	32	No	No	0	No Discrimination	No	No	Yes	Yes	No	No	No	No	2	Some Information	35-49	seconedu	urban	paid	Male
master only (1)	0.879669	21	No	No	0	No Discrimination	No	Yes	No	Yes	No	No	No	No	2	Some Information	50-54	seconedu	urban	paid	Male
master only (1)	0.903217	21	No	No	0	No Discrimination	No	No	No	Yes	No	No	No	No	1	Some Information	35-49	seconedu	urban	paid	Male
master only (1)	0.943086	67	No	No	0	No Discrimination	No	No	No	Yes	No	No	No	No	1	Some Information	35-49	primaryedu	rural	paid	Male
master only (1)	0.97741	21	No	No	0	No Discrimination	No	No	No	Yes	No	No	No	No	1	Some Information	35-49	seconedu	urban	paid	Male
master only (1)	0.980456	16	No	No	0	No Discrimination	No	No	No	Yes	No	No	No	No	1	Some Information	35-49	seconedu	rural	paid	Male
master only (1)	1.02548	21	No	No	0	No Discrimination	No	No	Yes	Yes	No	No	No	No	2	Some Information	35-49	seconedu	urban	paid	Male
master only (1)	1.05821	30	No	No	0	No Discrimination	Yes	Yes	Yes	Yes	Yes	No	No	No	5	More Information	25-34	highedu	urban	paid	Male
master only (1)	1.06985	16	No	No	0	No Discrimination	No	Yes	No	No	No	No	No	No	1	Some Information	35-49	seconedu	rural	paid	Male
master only (1)	1.07382	7	No	No	0	No Discrimination	Yes	No	No	Yes	No	No	No	No	2	Some Information	25-34	highedu	urban	paid	Male
master only (1)	1.08372	21	No	No	0	No Discrimination	No	No	No	Yes	No	No	No	No	1	Some Information	50-54	highedu	urban	paid	Male
master only (1)	1.08564	30	No	No	0	No Discrimination	No	No	No	Yes	No	No	No	No	1	Some Information	35-49	highedu	urban	paid	Male
master only (1)	1.1201	30	No	No	0	No Discrimination	No	Yes	Yes	Yes	No	No	No	No	3	Some Information	35-49	seconedu	urban	paid	Male
master only (1)	1.20819	21	No	No	0	No Discrimination	No	No	No	Yes	No	No	No	No	1	Some Information	35-49	seconedu	urban	paid	Male
master only (1)	1.22113	30	No	No	0	No Discrimination	No	No	No	No	No	No	No	No	0	No Information	35-49	primaryedu	urban	paid	Male
master only (1)	1.22745	21	No	No	0	No Discrimination	No	No	Yes	No	No	Yes	No	No	2	Some Information	35-49	highedu	urban	paid	Male
master only (1)	1.27045	16	No	No	0	No Discrimination	No	No	No	Yes	No	No	No	No	1	Some Information	35-49	primaryedu	rural	paid	Male
master only (1)	1.29634	30	No	No	0	No Discrimination	Yes	No	No	Yes	Yes	No	No	No	3	Some Information	35-49	seconedu	urban	paid	Male
master only (1)	1.29752	3	No	No	0	No Discrimination	Yes	No	Yes	Yes	No	No	No	No	3	Some Information	35-49	highedu	urban	paid	Male
master only (1)	1.30221	16	No	No	0	No Discrimination	No	No	No	Yes	No	No	No	No	1	Some Information	35-49	seconedu	rural	paid	Male
master only (1)	1.30399	30	No	No	0	No Discrimination	No	No	No	Yes	No	No	No	No	1	Some Information	35-49	primaryedu	urban	paid	Male
master only (1)	1.32988	22	No	No	0	No Discrimination	No	No	No	Yes	No	No	No	No	1	Some Information	35-49	primaryedu	urban	paid	Male
master only (1)	1.33257	22	No	No	0	No Discrimination	Yes	No	No	No	No	No	No	Yes	2	Some Information	25-34	highedu	urban	paid	Male
master only (1)	1.35586	16	No	No	0	No Discrimination	No	No	No	Yes	No	No	No	No	1	Some Information	35-49	primaryedu	rural	paid	Male
master only (1)	1.36169	21	No	No	0	No Discrimination	No	No	No	Yes	No	No	No	No	1	Some Information	35-49	primaryedu	urban	paid	Male
master only (1)	1.37407	30	No	No	0	No Discrimination	No	No	No	Yes	No	No	No	No	1	Some Information	35-49	seconedu	urban	paid	Male
master only (1)	1.37407	30	No	No	0	No Discrimination	No	No	No	Yes	No	No	No	No	1	Some Information	35-49	primaryedu	urban	paid	Male
master only (1)	1.37555	22	No	No	0	No Discrimination	No	No	No	Yes	No	No	No	No	1	Some Information	50-54	primaryedu	urban	paid	Male
master only (1)	1.38349	31	No	No	0	No Discrimination	No	No	Yes	Yes	No	No	No	No	2	Some Information	35-49	seconedu	rural	paid	Male
master only (1)	1.39215	33	No	No	0	No Discrimination	No	No	No	Yes	No	No	No	No	1	Some Information	35-49	primaryedu	rural	paid	Male
master only (1)	1.42488	24	No	No	0	No Discrimination	No	Yes	Yes	Yes	No	No	No	No	3	Some Information	50-54	seconedu	urban	paid	Male
master only (1)	1.44112	43	No	No	0	No Discrimination	No	No	No	Yes	No	No	No	No	1	Some Information	25-34	primaryedu	rural	paid	Male
master only (1)	1.45579	31	No	No	0	No Discrimination	No	No	Yes	Yes	No	No	No	No	2	Some Information	35-49	primaryedu	rural	paid	Male
master only (1)	1.4646	22	No	No	0	No Discrimination	No	Yes	No	Yes	No	No	No	No	2	Some Information	35-49	seconedu	urban	paid	Male
master only (1)	1.4868	38	No	No	0	No Discrimination	No	No	No	Yes	No	No	No	No	1	Some Information	25-34	seconedu	urban	paid	Male
master only (1)	1.51109	22	No	No	0	No Discrimination	Yes	No	No	Yes	No	No	No	No	2	Some Information	35-49	seconedu	urban	paid	Male
master only (1)	1.51123	22	No	No	0	No Discrimination	Yes	No	Yes	Yes	Yes	No	No	No	4	More Information	35-49	highedu	urban	paid	Male
master only (1)	1.52169	28	No	No	0	No Discrimination	No	No	No	Yes	No	No	No	No	1	Some Information	35-49	highedu	urban	paid	Male
master only (1)	1.52169	28	No	No	0	No Discrimination	No	No	No	Yes	No	No	No	No	1	Some Information	35-49	highedu	urban	paid	Male
master only (1)	1.52348	21	No	No	0	No Discrimination	No	Yes	Yes	Yes	No	No	No	No	3	Some Information	35-49	seconedu	urban	paid	Male
master only (1)	1.52662	21	No	No	0	No Discrimination	No	No	No	Yes	No	No	No	No	1	Some Information	25-34	highedu	urban	paid	Male
master only (1)	1.52662	21	No	No	0	No Discrimination	No	No	No	Yes	No	No	No	No	1	Some Information	50-54	highedu	urban	paid	Male
master only (1)	1.55463	16	No	No	0	No Discrimination	No	No	No	Yes	No	No	No	No	1	Some Information	35-49	seconedu	rural	paid	Male
master only (1)	1.59211	4	No	No	0	No Discrimination	No	No	No	Yes	No	No	No	No	1	Some Information	25-34	seconedu	rural	paid	Male
master only (1)	1.6219	22	No	No	0	No Discrimination	Yes	Yes	Yes	Yes	No	No	No	No	4	More Information	35-49	seconedu	urban	paid	Male
master only (1)	1.66105	28	No	No	0	No Discrimination	No	No	Yes	Yes	No	No	No	No	2	Some Information	50-54	seconedu	urban	paid	Male
master only (1)	1.66614	28	No	No	0	No Discrimination	Yes	No	Yes	Yes	No	No	No	No	3	Some Information	35-49	highedu	urban	paid	Male
master only (1)	1.67012	32	No	No	0	No Discrimination	No	No	No	No	No	Yes	No	Yes	2	Some Information	25-34	highedu	urban	paid	Male
master only (1)	1.70809	22	No	No	0	No Discrimination	No	No	No	Yes	No	No	No	Yes	2	Some Information	35-49	seconedu	urban	paid	Male
master only (1)	1.70809	22	No	No	0	No Discrimination	Yes	No	Yes	No	No	No	No	No	2	Some Information	35-49	highedu	urban	paid	Male
master only (1)	1.72692	22	No	No	0	No Discrimination	No	No	Yes	Yes	No	No	No	No	2	Some Information	50-54	highedu	urban	paid	Male
master only (1)	1.72721	28	No	No	0	No Discrimination	No	No	No	Yes	No	No	No	No	1	Some Information	25-34	seconedu	urban	paid	Male
master only (1)	1.75593	24	No	No	0	No Discrimination	No	No	No	Yes	No	No	No	No	1	Some Information	25-34	seconedu	urban	paid	Male
master only (1)	1.763	32	No	No	0	No Discrimination	No	No	No	Yes	No	No	No	No	1	Some Information	50-54	seconedu	urban	paid	Male
master only (1)	1.77425	28	No	No	0	No Discrimination	No	No	Yes	Yes	No	No	No	No	2	Some Information	35-49	seconedu	urban	paid	Male
master only (1)	1.81588	28	No	No	0	No Discrimination	No	No	No	Yes	No	No	No	No	1	Some Information	35-49	highedu	urban	paid	Male
master only (1)	1.83325	25	No	No	0	No Discrimination	No	No	No	Yes	No	No	No	No	1	Some Information	35-49	primaryedu	rural	paid	Male
master only (1)	1.83378	25	No	No	0	No Discrimination	No	No	No	Yes	No	No	No	No	1	Some Information	35-49	seconedu	rural	paid	Male
master only (1)	1.90968	22	No	No	0	No Discrimination	No	No	No	Yes	Yes	No	No	No	2	Some Information	35-49	seconedu	urban	paid	Male
master only (1)	1.95887	25	No	No	0	No Discrimination	No	No	Yes	Yes	Yes	No	No	No	3	Some Information	35-49	primaryedu	rural	paid	Male
master only (1)	1.99455	22	No	No	0	No Discrimination	No	No	No	Yes	No	No	No	No	1	Some Information	35-49	seconedu	urban	paid	Male
master only (1)	2.07214	24	No	No	0	No Discrimination	Yes	No	Yes	Yes	No	No	No	No	3	Some Information	35-49	highedu	urban	paid	Male
master only (1)	2.07394	29	No	No	0	No Discrimination	No	No	No	Yes	No	No	No	No	1	Some Information	35-49	primaryedu	rural	paid	Male
master only (1)	2.07394	29	No	No	0	No Discrimination	Yes	No	Yes	Yes	No	No	No	No	3	Some Information	35-49	highedu	rural	paid	Male
master only (1)	2.07394	29	No	No	0	No Discrimination	No	Yes	Yes	Yes	No	No	No	No	3	Some Information	35-49	highedu	rural	paid	Male
master only (1)	2.21968	25	No	No	0	No Discrimination	No	No	Yes	Yes	No	No	No	No	2	Some Information	35-49	seconedu	rural	paid	Male
master only (1)	2.24037	29	No	No	0	No Discrimination	No	No	No	Yes	No	No	No	No	1	Some Information	35-49	seconedu	rural	paid	Male
master only (1)	2.27777	29	No	No	0	No Discrimination	Yes	No	No	Yes	No	No	No	No	2	Some Information	35-49	highedu	rural	paid	Male
master only (1)	2.46182	32	No	No	0	No Discrimination	No	Yes	Yes	Yes	No	No	No	No	3	Some Information	35-49	seconedu	urban	paid	Male
master only (1)	2.5296	28	No	No	0	No Discrimination	No	Yes	No	Yes	No	No	No	No	2	Some Information	50-54	primaryedu	urban	paid	Male
master only (1)	2.74537	23	No	No	0	No Discrimination	No	No	No	Yes	No	No	No	No	1	Some Information	35-49	seconedu	rural	paid	Male
master only (1)	2.93589	23	No	No	0	No Discrimination	No	No	No	No	No	No	No	No	0	No Information	35-49	seconedu	rural	paid	Male
master only (1)	3.62557	22	No	No	0	No Discrimination	No	No	Yes	No	Yes	No	No	No	2	Some Information	50-54	highedu	urban	paid	Male
master only (1)	0.469597	51	No	No	0	No Discrimination	No	No	No	Yes	No	No	No	No	1	Some Information	35-49	seconedu	rural	paid	Male
master only (1)	0.498085	40	No	No	0	No Discrimination	Yes	No	Yes	Yes	No	No	No	No	3	Some Information	35-49	highedu	urban	paid	Male
master only (1)	0.514142	44	No	No	0	No Discrimination	No	No	No	Yes	No	No	No	No	1	Some Information	50-54	seconedu	urban	paid	Male
master only (1)	0.52937	51	No	No	0	No Discrimination	No	No	No	Yes	Yes	No	No	No	2	Some Information	35-49	seconedu	rural	paid	Male
master only (1)	0.76741	32	No	No	0	No Discrimination	No	Yes	No	Yes	No	No	No	No	2	Some Information	35-49	highedu	urban	paid	Male
master only (1)	0.834393	35	No	No	0	No Discrimination	No	Yes	Yes	Yes	No	No	No	No	3	Some Information	25-34	highedu	rural	paid	Male
master only (1)	0.855805	15	No	No	0	No Discrimination	No	No	No	Yes	No	No	No	No	1	Some Information	35-49	seconedu	urban	paid	Male
master only (1)	0.897643	39	No	No	0	No Discrimination	No	No	Yes	Yes	No	No	No	No	2	Some Information	35-49	seconedu	rural	paid	Male
master only (1)	0.905287	41	No	No	0	No Discrimination	No	No	No	Yes	No	No	No	No	1	Some Information	35-49	primaryedu	rural	paid	Male
master only (1)	0.906086	32	No	No	0	No Discrimination	No	Yes	No	Yes	No	No	No	No	2	Some Information	35-49	seconedu	urban	paid	Male
master only (1)	0.925666	15	No	No	0	No Discrimination	Yes	Yes	Yes	Yes	No	No	No	No	4	More Information	25-34	seconedu	urban	paid	Male
master only (1)	0.97741	21	No	No	0	No Discrimination	No	No	No	Yes	No	No	No	Yes	2	Some Information	35-49	highedu	urban	paid	Male
master only (1)	1.01233	43	No	No	0	No Discrimination	No	No	No	Yes	Yes	No	No	No	2	Some Information	50-54	seconedu	rural	paid	Male
master only (1)	1.0263	32	No	No	0	No Discrimination	Yes	No	Yes	Yes	No	No	No	No	3	Some Information	35-49	seconedu	urban	paid	Male
master only (1)	1.1167	30	No	No	0	No Discrimination	No	No	No	Yes	No	No	No	No	1	Some Information	25-34	seconedu	urban	paid	Male
master only (1)	1.31064	22	No	No	0	No Discrimination	Yes	No	No	Yes	No	No	No	No	2	Some Information	35-49	primaryedu	urban	paid	Male
master only (1)	1.47948	22	No	No	0	No Discrimination	Yes	No	No	Yes	No	No	No	No	2	Some Information	35-49	highedu	urban	paid	Male
master only (1)	1.53049	22	No	No	0	No Discrimination	Yes	No	No	Yes	No	Yes	No	No	3	Some Information	25-34	seconedu	urban	paid	Male
master only (1)	1.70535	28	No	No	0	No Discrimination	No	No	No	Yes	No	No	No	No	1	Some Information	25-34	seconedu	urban	paid	Male
master only (1)	1.763	32	No	No	0	No Discrimination	No	Yes	No	No	No	No	No	No	1	Some Information	35-49	seconedu	urban	paid	Male
master only (1)	1.79606	28	No	No	0	No Discrimination	No	No	No	Yes	Yes	No	No	No	2	Some Information	25-34	seconedu	urban	no paid	Male
master only (1)	1.88251	25	No	No	0	No Discrimination	No	Yes	No	Yes	Yes	No	No	No	3	Some Information	35-49	primaryedu	rural	paid	Male
master only (1)	2.16625	28	No	No	0	No Discrimination	No	No	No	Yes	No	No	No	No	1	Some Information	25-34	seconedu	urban	paid	Male
master only (1)	0.327786	51	No	No	0	No Discrimination	No	No	No	Yes	No	No	No	No	1	Some Information	25-34	seconedu	rural	paid	Male
master only (1)	0.327786	51	No	No	0	No Discrimination	No	No	No	Yes	No	No	No	No	1	Some Information	35-49	seconedu	rural	paid	Male
master only (1)	0.544764	13	No	No	0	No Discrimination	Yes	No	No	Yes	No	No	No	No	2	Some Information	25-34	highedu	urban	paid	Male
master only (1)	1.04225	45	No	No	0	No Discrimination	No	No	Yes	Yes	No	No	No	No	2	Some Information	35-49	seconedu	rural	paid	Male
master only (1)	1.57745	28	No	No	0	No Discrimination	No	No	No	No	Yes	No	No	No	1	Some Information	35-49	highedu	urban	paid	Male
master only (1)	1.5793	22	No	No	0	No Discrimination	Yes	No	No	Yes	No	No	No	No	2	Some Information	50-54	seconedu	urban	paid	Male
master only (1)	1.84668	25	No	No	0	No Discrimination	No	No	No	Yes	No	Yes	No	No	2	Some Information	35-49	primaryedu	rural	no paid	Male
master only (1)	0.120739	46	No	No	0	No Discrimination	Yes	No	Yes	Yes	No	No	No	No	3	Some Information	35-49	highedu	urban	paid	Male
master only (1)	0.137563	58	No	No	0	No Discrimination	No	No	No	Yes	No	No	No	No	1	Some Information	35-49	highedu	urban	paid	Male
master only (1)	0.139519	59	No	No	0	No Discrimination	No	No	No	No	No	No	No	No	0	No Information	25-34	seconedu	rural	paid	Male
master only (1)	0.150624	46	No	No	0	No Discrimination	No	No	No	Yes	Yes	No	No	No	2	Some Information	35-49	seconedu	urban	paid	Male
master only (1)	0.181607	46	No	No	0	No Discrimination	No	No	No	Yes	No	No	No	No	1	Some Information	25-34	primaryedu	urban	paid	Male
master only (1)	0.18185	65	No	No	0	No Discrimination	No	No	No	Yes	Yes	No	No	No	2	Some Information	25-34	seconedu	rural	paid	Male
master only (1)	0.220531	54	No	No	0	No Discrimination	Yes	No	No	Yes	Yes	No	No	No	3	Some Information	35-49	seconedu	urban	paid	Male
master only (1)	0.255774	63	No	No	0	No Discrimination	No	No	No	No	No	No	No	No	0	No Information	35-49	primaryedu	rural	paid	Male
master only (1)	0.273655	55	No	No	0	No Discrimination	Yes	No	No	Yes	No	No	No	No	2	Some Information	25-34	primaryedu	rural	paid	Male
master only (1)	0.303566	13	No	No	0	No Discrimination	No	No	No	Yes	No	No	No	No	1	Some Information	25-34	seconedu	urban	paid	Male
master only (1)	0.351735	57	No	No	0	No Discrimination	No	No	No	Yes	No	No	No	No	1	Some Information	35-49	seconedu	rural	paid	Male
master only (1)	0.375021	50	No	No	0	No Discrimination	Yes	No	Yes	Yes	No	No	No	No	3	Some Information	25-34	highedu	urban	paid	Male
master only (1)	0.392941	55	No	No	0	No Discrimination	No	No	No	No	Yes	No	No	No	1	Some Information	25-34	seconedu	rural	paid	Male
master only (1)	0.416485	37	No	No	0	No Discrimination	Yes	No	No	Yes	No	No	No	No	2	Some Information	35-49	primaryedu	rural	paid	Male
master only (1)	0.436215	18	No	No	0	No Discrimination	No	No	No	Yes	No	No	No	No	1	Some Information	35-49	primaryedu	rural	paid	Male
master only (1)	0.448696	5	No	No	0	No Discrimination	No	No	Yes	Yes	No	No	No	No	2	Some Information	35-49	seconedu	urban	paid	Male
master only (1)	0.456168	14	No	No	0	No Discrimination	No	No	No	Yes	No	No	No	No	1	Some Information	50-54	seconedu	rural	paid	Male
master only (1)	0.456168	14	No	No	0	No Discrimination	No	No	No	Yes	No	No	No	No	1	Some Information	50-54	seconedu	rural	paid	Male
master only (1)	0.507057	40	No	No	0	No Discrimination	No	No	No	Yes	No	No	No	No	1	Some Information	50-54	seconedu	urban	paid	Male
master only (1)	0.541109	14	No	No	0	No Discrimination	No	No	Yes	Yes	No	No	No	No	2	Some Information	35-49	highedu	rural	paid	Male
master only (1)	0.55244	34	No	No	0	No Discrimination	No	No	No	Yes	No	No	No	No	1	Some Information	35-49	seconedu	urban	paid	Male
master only (1)	0.707511	34	No	No	0	No Discrimination	Yes	Yes	Yes	Yes	No	No	No	No	4	More Information	35-49	highedu	urban	paid	Male
master only (1)	0.722336	48	No	No	0	No Discrimination	Yes	No	No	Yes	No	Yes	No	No	3	Some Information	35-49	seconedu	urban	paid	Male
master only (1)	0.738011	52	No	No	0	No Discrimination	No	No	No	No	Yes	No	No	No	1	Some Information	35-49	seconedu	urban	paid	Male
master only (1)	0.770133	38	No	No	0	No Discrimination	No	No	No	Yes	No	No	No	No	1	Some Information	35-49	seconedu	urban	paid	Male
master only (1)	0.822905	16	No	No	0	No Discrimination	No	No	No	Yes	No	No	No	No	1	Some Information	35-49	seconedu	rural	paid	Male
master only (1)	0.892309	15	No	No	0	No Discrimination	No	No	No	Yes	Yes	No	No	No	2	Some Information	35-49	highedu	urban	paid	Male
master only (1)	0.933118	32	No	No	0	No Discrimination	No	No	Yes	Yes	No	No	No	No	2	Some Information	35-49	highedu	urban	paid	Male
master only (1)	0.943086	67	No	No	0	No Discrimination	No	No	No	Yes	No	No	No	No	1	Some Information	35-49	seconedu	rural	paid	Male
master only (1)	0.988262	3	No	No	0	No Discrimination	No	No	No	Yes	No	No	No	No	1	Some Information	25-34	seconedu	urban	paid	Male
master only (1)	1.01385	8	No	No	0	No Discrimination	No	No	No	Yes	No	No	No	No	1	Some Information	50-54	seconedu	rural	paid	Male
master only (1)	1.07377	15	No	No	0	No Discrimination	Yes	No	Yes	Yes	Yes	No	No	No	4	More Information	35-49	seconedu	urban	paid	Male
master only (1)	1.08372	21	No	No	0	No Discrimination	No	No	No	Yes	No	No	No	No	1	Some Information	35-49	seconedu	urban	paid	Male
master only (1)	1.08564	30	No	No	0	No Discrimination	Yes	Yes	Yes	Yes	No	No	No	No	4	More Information	35-49	seconedu	urban	paid	Male
master only (1)	1.10455	21	No	No	0	No Discrimination	No	No	No	Yes	No	No	No	No	1	Some Information	50-54	highedu	urban	paid	Male
master only (1)	1.14763	41	No	No	0	No Discrimination	Yes	No	No	Yes	No	No	No	No	2	Some Information	25-34	seconedu	rural	paid	Male
master only (1)	1.15213	6	No	No	0	No Discrimination	No	No	Yes	Yes	Yes	No	No	No	3	Some Information	50-54	primaryedu	rural	paid	Male
master only (1)	1.20819	21	No	No	0	No Discrimination	Yes	No	No	No	No	No	No	Yes	2	Some Information	25-34	seconedu	urban	paid	Male
master only (1)	1.22113	30	No	No	0	No Discrimination	No	No	Yes	Yes	Yes	No	No	No	3	Some Information	35-49	seconedu	urban	paid	Male
master only (1)	1.22745	21	No	No	0	No Discrimination	No	No	Yes	Yes	No	No	No	No	2	Some Information	35-49	highedu	urban	paid	Male
master only (1)	1.25384	30	No	No	0	No Discrimination	Yes	No	Yes	Yes	No	No	No	No	3	Some Information	35-49	seconedu	urban	paid	Male
master only (1)	1.26895	30	No	No	0	No Discrimination	No	No	No	Yes	No	No	No	No	1	Some Information	15-24	primaryedu	urban	paid	Male
master only (1)	1.27609	24	No	No	0	No Discrimination	No	No	No	Yes	No	No	No	No	1	Some Information	35-49	seconedu	urban	paid	Male
master only (1)	1.28631	33	No	No	0	No Discrimination	No	Yes	No	No	No	No	No	No	1	Some Information	35-49	seconedu	rural	paid	Male
master only (1)	1.32474	24	No	No	0	No Discrimination	No	No	No	Yes	No	No	No	No	1	Some Information	35-49	primaryedu	urban	paid	Male
master only (1)	1.32729	32	No	No	0	No Discrimination	Yes	No	No	Yes	No	No	No	No	2	Some Information	25-34	primaryedu	urban	paid	Male
master only (1)	1.33405	22	No	No	0	No Discrimination	No	No	No	Yes	No	No	No	No	1	Some Information	35-49	seconedu	urban	paid	Male
master only (1)	1.36169	21	No	No	0	No Discrimination	No	No	No	Yes	No	No	No	No	1	Some Information	35-49	seconedu	urban	paid	Male
master only (1)	1.38954	28	No	No	0	No Discrimination	Yes	No	No	Yes	No	No	No	No	2	Some Information	35-49	seconedu	urban	paid	Male
master only (1)	1.39215	33	No	No	0	No Discrimination	No	No	No	Yes	No	No	No	No	1	Some Information	35-49	seconedu	rural	paid	Male
master only (1)	1.42072	16	No	No	0	No Discrimination	No	No	No	Yes	No	No	No	No	1	Some Information	35-49	seconedu	rural	paid	Male
master only (1)	1.48234	22	No	No	0	No Discrimination	Yes	Yes	Yes	Yes	No	Yes	No	No	5	More Information	35-49	highedu	urban	paid	Male
master only (1)	1.52149	22	No	No	0	No Discrimination	No	No	No	Yes	No	No	No	No	1	Some Information	35-49	primaryedu	urban	paid	Male
master only (1)	1.52885	22	No	No	0	No Discrimination	No	No	Yes	Yes	No	No	No	No	2	Some Information	35-49	highedu	urban	paid	Male
master only (1)	1.53103	22	No	No	0	No Discrimination	No	No	Yes	No	No	No	No	No	1	Some Information	35-49	primaryedu	urban	paid	Male
master only (1)	1.5475	22	No	No	0	No Discrimination	No	No	No	Yes	No	No	No	No	1	Some Information	35-49	seconedu	urban	paid	Male
master only (1)	1.57091	31	No	No	0	No Discrimination	Yes	No	Yes	Yes	No	No	No	No	3	Some Information	25-34	seconedu	rural	paid	Male
master only (1)	1.58907	28	No	No	0	No Discrimination	No	No	No	Yes	No	No	No	No	1	Some Information	35-49	seconedu	urban	paid	Male
master only (1)	1.60696	28	No	No	0	No Discrimination	No	No	No	Yes	No	No	No	No	1	Some Information	35-49	primaryedu	urban	paid	Male
master only (1)	1.61564	24	No	No	0	No Discrimination	Yes	No	Yes	Yes	No	No	No	No	3	Some Information	35-49	seconedu	urban	paid	Male
master only (1)	1.68701	28	No	No	0	No Discrimination	No	No	No	Yes	No	No	No	No	1	Some Information	35-49	highedu	urban	paid	Male
master only (1)	1.69034	22	No	No	0	No Discrimination	No	No	No	No	No	No	No	No	0	No Information	25-34	primaryedu	urban	paid	Male
master only (1)	1.7692	27	No	No	0	No Discrimination	Yes	Yes	Yes	Yes	Yes	Yes	No	Yes	7	More Information	50-54	highedu	rural	paid	Male
master only (1)	1.77683	24	No	No	0	No Discrimination	No	No	No	Yes	No	No	No	No	1	Some Information	35-49	primaryedu	urban	paid	Male
master only (1)	1.83325	25	No	No	0	No Discrimination	No	No	No	Yes	No	No	No	No	1	Some Information	35-49	primaryedu	rural	paid	Male
master only (1)	1.9519	28	No	No	0	No Discrimination	No	No	No	Yes	No	No	No	No	1	Some Information	35-49	seconedu	urban	paid	Male
master only (1)	2.04421	29	No	No	0	No Discrimination	No	No	Yes	Yes	No	No	No	No	2	Some Information	50-54	highedu	rural	paid	Male
master only (1)	2.04421	29	No	No	0	No Discrimination	No	No	No	Yes	No	No	No	No	1	Some Information	35-49	seconedu	rural	paid	Male
master only (1)	2.11627	29	No	No	0	No Discrimination	No	No	No	Yes	No	No	No	No	1	Some Information	35-49	seconedu	rural	paid	Male
master only (1)	2.18736	29	No	No	0	No Discrimination	Yes	Yes	No	Yes	No	No	No	No	3	Some Information	25-34	seconedu	rural	paid	Male
master only (1)	2.34704	22	No	No	0	No Discrimination	Yes	No	No	Yes	No	No	No	No	2	Some Information	25-34	seconedu	urban	paid	Male
master only (1)	2.34759	29	No	No	0	No Discrimination	No	No	Yes	Yes	No	No	No	Yes	3	Some Information	35-49	seconedu	rural	paid	Male
master only (1)	2.44809	22	No	No	0	No Discrimination	Yes	No	Yes	Yes	No	No	No	No	3	Some Information	35-49	seconedu	urban	paid	Male
master only (1)	2.45167	23	No	No	0	No Discrimination	Yes	No	Yes	Yes	No	No	No	No	3	Some Information	25-34	highedu	rural	paid	Male
master only (1)	2.46182	32	No	No	0	No Discrimination	No	No	Yes	Yes	No	No	No	No	2	Some Information	50-54	seconedu	urban	paid	Male
master only (1)	2.64723	23	No	No	0	No Discrimination	No	No	Yes	Yes	No	No	No	No	2	Some Information	35-49	highedu	rural	paid	Male
master only (1)	0.085971	60	No	No	0	No Discrimination	No	No	No	No	No	Yes	No	No	1	Some Information	25-34	highedu	urban	paid	Male
master only (1)	0.10495	60	No	No	0	No Discrimination	No	No	No	No	Yes	No	No	No	1	Some Information	25-34	seconedu	urban	paid	Male
master only (1)	0.113585	63	No	No	0	No Discrimination	No	No	No	Yes	No	No	No	No	1	Some Information	25-34	seconedu	rural	paid	Male
master only (1)	0.115033	47	No	No	0	No Discrimination	Yes	No	Yes	Yes	No	No	No	No	3	Some Information	35-49	highedu	rural	paid	Male
master only (1)	0.129098	60	No	No	0	No Discrimination	No	No	Yes	Yes	Yes	Yes	No	No	4	More Information	35-49	seconedu	urban	paid	Male
master only (1)	0.140116	47	No	No	0	No Discrimination	No	No	No	Yes	No	No	No	No	1	Some Information	35-49	seconedu	rural	paid	Male
master only (1)	0.147861	61	No	No	0	No Discrimination	No	No	No	Yes	No	Yes	No	No	2	Some Information	25-34	seconedu	rural	paid	Male
master only (1)	0.148137	19	No	No	0	No Discrimination	Yes	No	Yes	Yes	No	Yes	No	No	4	More Information	35-49	highedu	urban	paid	Male
master only (1)	0.150801	17	No	No	0	No Discrimination	No	No	Yes	Yes	No	No	No	No	2	Some Information	35-49	highedu	urban	paid	Male
master only (1)	0.152126	60	No	No	0	No Discrimination	No	No	No	Yes	Yes	No	No	No	2	Some Information	35-49	seconedu	urban	paid	Male
master only (1)	0.158694	62	No	No	0	No Discrimination	No	No	Yes	Yes	No	No	No	No	2	Some Information	35-49	seconedu	urban	paid	Male
master only (1)	0.172527	17	No	No	0	No Discrimination	Yes	Yes	Yes	Yes	No	No	No	No	4	More Information	25-34	seconedu	urban	paid	Male
master only (1)	0.172675	63	No	No	0	No Discrimination	No	No	Yes	Yes	No	No	No	No	2	Some Information	35-49	highedu	rural	paid	Male
master only (1)	0.179026	17	No	No	0	No Discrimination	Yes	No	No	Yes	No	No	No	No	2	Some Information	25-34	seconedu	urban	paid	Male
master only (1)	0.186077	62	No	No	0	No Discrimination	Yes	Yes	Yes	Yes	No	No	No	No	4	More Information	35-49	highedu	urban	paid	Male
master only (1)	0.232791	36	No	No	0	No Discrimination	Yes	Yes	Yes	Yes	Yes	No	No	Yes	6	More Information	35-49	highedu	urban	paid	Male
master only (1)	0.252114	17	No	No	0	No Discrimination	No	No	Yes	Yes	No	No	No	No	2	Some Information	50-54	seconedu	urban	paid	Male
master only (1)	0.261905	44	No	No	0	No Discrimination	No	No	No	Yes	No	No	No	No	1	Some Information	25-34	seconedu	urban	paid	Male
master only (1)	0.261905	44	No	No	0	No Discrimination	No	No	Yes	Yes	No	No	No	No	2	Some Information	35-49	seconedu	urban	paid	Male
master only (1)	0.267765	19	No	No	0	No Discrimination	No	No	Yes	Yes	No	No	No	No	2	Some Information	50-54	seconedu	urban	paid	Male
master only (1)	0.270854	19	No	No	0	No Discrimination	No	No	No	Yes	No	No	No	No	1	Some Information	35-49	seconedu	urban	paid	Male
master only (1)	0.287145	60	No	No	0	No Discrimination	No	No	No	Yes	No	No	No	No	1	Some Information	25-34	seconedu	urban	paid	Male
master only (1)	0.291442	50	No	No	0	No Discrimination	No	No	Yes	Yes	No	No	No	No	2	Some Information	25-34	seconedu	urban	paid	Male
master only (1)	0.295635	44	No	No	0	No Discrimination	Yes	Yes	Yes	Yes	No	No	No	No	4	More Information	35-49	highedu	urban	paid	Male
master only (1)	0.296534	17	No	No	0	No Discrimination	No	No	No	Yes	No	No	No	No	1	Some Information	25-34	seconedu	urban	paid	Male
master only (1)	0.296534	17	No	No	0	No Discrimination	No	No	No	Yes	No	No	No	No	1	Some Information	50-54	noedu	urban	paid	Male
master only (1)	0.319978	2	No	No	0	No Discrimination	No	No	No	Yes	Yes	No	No	No	2	Some Information	35-49	seconedu	rural	paid	Male
master only (1)	0.322797	50	No	No	0	No Discrimination	Yes	No	No	Yes	No	No	No	No	2	Some Information	25-34	seconedu	urban	paid	Male
master only (1)	0.329758	17	No	No	0	No Discrimination	No	No	No	Yes	No	No	No	No	1	Some Information	50-54	primaryedu	urban	paid	Male
master only (1)	0.34525	14	No	No	0	No Discrimination	No	Yes	No	Yes	No	No	No	No	2	Some Information	35-49	primaryedu	rural	paid	Male
master only (1)	0.347396	2	No	No	0	No Discrimination	Yes	No	Yes	Yes	No	No	No	No	3	Some Information	25-34	seconedu	rural	paid	Male
master only (1)	0.354439	40	No	No	0	No Discrimination	Yes	No	Yes	Yes	No	No	No	No	3	Some Information	35-49	highedu	urban	paid	Male
master only (1)	0.359258	44	No	No	0	No Discrimination	No	No	No	Yes	No	No	No	No	1	Some Information	50-54	seconedu	urban	paid	Male
master only (1)	0.375021	50	No	No	0	No Discrimination	Yes	No	No	Yes	No	No	No	No	2	Some Information	25-34	seconedu	urban	paid	Male
master only (1)	0.384213	44	No	No	0	No Discrimination	Yes	No	No	Yes	No	No	No	Yes	3	Some Information	35-49	seconedu	urban	paid	Male
master only (1)	0.384213	44	No	No	0	No Discrimination	No	No	No	No	No	No	No	No	0	No Information	35-49	primaryedu	urban	paid	Male
master only (1)	0.392941	55	No	No	0	No Discrimination	Yes	Yes	Yes	Yes	No	No	No	No	4	More Information	35-49	seconedu	rural	paid	Male
master only (1)	0.427039	18	No	No	0	No Discrimination	No	No	Yes	No	No	No	No	No	1	Some Information	35-49	seconedu	rural	paid	Male
master only (1)	0.428869	52	No	No	0	No Discrimination	No	No	No	No	No	Yes	No	No	1	Some Information	25-34	seconedu	urban	paid	Male
master only (1)	0.429296	36	No	No	0	No Discrimination	No	No	No	Yes	Yes	No	No	No	2	Some Information	35-49	seconedu	urban	paid	Male
master only (1)	0.437388	44	No	No	0	No Discrimination	Yes	No	No	Yes	No	No	No	Yes	3	Some Information	25-34	seconedu	urban	paid	Male
master only (1)	0.437388	44	No	No	0	No Discrimination	Yes	No	Yes	Yes	No	No	No	No	3	Some Information	50-54	seconedu	urban	paid	Male
master only (1)	0.448969	18	No	No	0	No Discrimination	Yes	Yes	No	No	No	No	No	No	2	Some Information	25-34	seconedu	rural	paid	Male
master only (1)	0.452971	11	No	No	0	No Discrimination	Yes	Yes	No	Yes	No	No	No	No	3	Some Information	35-49	primaryedu	urban	paid	Male
master only (1)	0.45676	14	No	No	0	No Discrimination	No	No	Yes	Yes	Yes	No	No	No	3	Some Information	50-54	seconedu	rural	paid	Male
master only (1)	0.463153	44	No	No	0	No Discrimination	Yes	No	No	Yes	No	No	No	Yes	3	Some Information	25-34	seconedu	urban	paid	Male
master only (1)	0.478487	44	No	No	0	No Discrimination	No	Yes	No	Yes	No	No	No	No	2	Some Information	25-34	seconedu	urban	paid	Male
master only (1)	0.478487	44	No	No	0	No Discrimination	Yes	No	No	Yes	No	No	No	Yes	3	Some Information	25-34	seconedu	urban	paid	Male
master only (1)	0.478487	44	No	No	0	No Discrimination	No	Yes	No	Yes	No	No	No	No	2	Some Information	25-34	seconedu	urban	paid	Male
master only (1)	0.478487	44	No	No	0	No Discrimination	No	Yes	No	No	No	No	No	No	1	Some Information	15-24	primaryedu	urban	paid	Male
master only (1)	0.480496	14	No	No	0	No Discrimination	Yes	No	Yes	Yes	No	No	No	No	3	Some Information	35-49	highedu	rural	paid	Male
master only (1)	0.491003	66	No	No	0	No Discrimination	No	No	No	No	Yes	No	No	No	1	Some Information	35-49	seconedu	urban	no paid	Male
master only (1)	0.491003	66	No	No	0	No Discrimination	No	No	No	No	No	No	No	No	0	No Information	35-49	seconedu	urban	paid	Male
master only (1)	0.498035	44	No	No	0	No Discrimination	No	No	No	Yes	No	No	No	No	1	Some Information	35-49	seconedu	urban	paid	Male
master only (1)	0.502123	51	No	No	0	No Discrimination	Yes	No	Yes	Yes	No	No	No	No	3	Some Information	25-34	highedu	rural	paid	Male
master only (1)	0.517877	5	No	No	0	No Discrimination	Yes	Yes	Yes	Yes	Yes	No	No	Yes	6	More Information	35-49	highedu	urban	paid	Male
master only (1)	0.524423	52	No	No	0	No Discrimination	No	No	No	No	No	No	No	No	0	No Information	35-49	primaryedu	urban	paid	Male
master only (1)	0.537737	38	No	No	0	No Discrimination	No	No	Yes	No	Yes	No	No	Yes	3	Some Information	35-49	highedu	urban	paid	Male
master only (1)	0.537737	38	No	No	0	No Discrimination	No	No	No	Yes	No	No	No	No	1	Some Information	50-54	seconedu	urban	paid	Male
master only (1)	0.543523	67	No	No	0	No Discrimination	No	Yes	Yes	Yes	Yes	Yes	No	Yes	6	More Information	50-54	seconedu	rural	no paid	Male
master only (1)	0.605275	52	No	No	0	No Discrimination	No	No	No	Yes	No	No	No	No	1	Some Information	50-54	seconedu	urban	paid	Male
master only (1)	0.605275	52	No	No	0	No Discrimination	No	No	No	Yes	No	No	No	No	1	Some Information	35-49	seconedu	urban	paid	Male
master only (1)	0.626248	34	No	No	0	No Discrimination	Yes	No	Yes	Yes	Yes	No	No	No	4	More Information	35-49	highedu	urban	paid	Male
master only (1)	0.631856	30	No	No	0	No Discrimination	No	No	No	Yes	No	No	No	No	1	Some Information	25-34	seconedu	urban	paid	Male
master only (1)	0.63669	42	No	No	0	No Discrimination	Yes	No	Yes	Yes	No	No	No	Yes	4	More Information	35-49	highedu	urban	paid	Male
master only (1)	0.656503	52	No	No	0	No Discrimination	No	No	No	Yes	No	No	No	No	1	Some Information	50-54	highedu	urban	paid	Male
master only (1)	0.675739	37	No	No	0	No Discrimination	Yes	No	No	Yes	No	No	No	No	2	Some Information	35-49	seconedu	rural	paid	Male
master only (1)	0.679846	48	No	No	0	No Discrimination	Yes	No	Yes	Yes	No	Yes	No	No	4	More Information	50-54	highedu	urban	paid	Male
master only (1)	0.679846	48	No	No	0	No Discrimination	No	No	Yes	Yes	No	No	No	No	2	Some Information	35-49	highedu	urban	paid	Male
master only (1)	0.686325	5	No	No	0	No Discrimination	No	Yes	Yes	No	Yes	No	No	No	3	Some Information	35-49	highedu	urban	paid	Male
master only (1)	0.694176	66	No	No	0	No Discrimination	Yes	No	No	Yes	Yes	No	No	No	3	Some Information	25-34	highedu	urban	paid	Male
master only (1)	0.694176	66	No	No	0	No Discrimination	Yes	No	No	Yes	No	No	No	Yes	3	Some Information	35-49	seconedu	urban	paid	Male
master only (1)	0.694176	66	No	No	0	No Discrimination	No	No	No	No	No	No	No	No	0	No Information	50-54	primaryedu	urban	no paid	Male
master only (1)	0.694176	66	No	No	0	No Discrimination	No	No	No	No	No	No	No	No	0	No Information	35-49	primaryedu	urban	paid	Male
master only (1)	0.706154	52	No	No	0	No Discrimination	No	No	No	Yes	No	No	No	No	1	Some Information	35-49	seconedu	urban	paid	Male
master only (1)	0.725154	49	No	No	0	No Discrimination	No	No	No	Yes	No	No	No	No	1	Some Information	35-49	seconedu	rural	paid	Male
master only (1)	0.725154	49	No	No	0	No Discrimination	No	No	Yes	No	No	No	No	No	1	Some Information	50-54	seconedu	rural	paid	Male
master only (1)	0.749482	49	No	No	0	No Discrimination	No	No	No	Yes	No	No	No	No	1	Some Information	50-54	primaryedu	rural	paid	Male
master only (1)	0.774054	52	No	No	0	No Discrimination	Yes	No	No	Yes	No	No	No	No	2	Some Information	35-49	seconedu	urban	paid	Male
master only (1)	0.78992	67	No	No	0	No Discrimination	No	No	Yes	No	No	No	No	No	1	Some Information	35-49	seconedu	rural	paid	Male
master only (1)	0.791326	3	No	No	0	No Discrimination	No	No	No	Yes	No	No	No	No	1	Some Information	35-49	seconedu	urban	paid	Male
master only (1)	0.791326	3	No	No	0	No Discrimination	No	No	No	No	Yes	No	No	Yes	2	Some Information	35-49	highedu	urban	paid	Male
master only (1)	0.79273	26	No	No	0	No Discrimination	No	No	Yes	Yes	No	No	No	Yes	3	Some Information	35-49	seconedu	urban	paid	Male
master only (1)	0.79273	26	No	No	0	No Discrimination	No	No	Yes	Yes	No	Yes	No	No	3	Some Information	35-49	primaryedu	urban	paid	Male
master only (1)	0.797314	30	No	No	0	No Discrimination	No	No	Yes	Yes	No	No	No	No	2	Some Information	35-49	highedu	urban	paid	Male
master only (1)	0.79961	3	No	No	0	No Discrimination	No	Yes	No	Yes	No	No	No	No	2	Some Information	35-49	highedu	urban	paid	Male
master only (1)	0.800625	26	No	No	0	No Discrimination	Yes	No	No	Yes	No	No	No	Yes	3	Some Information	15-24	seconedu	urban	paid	Male
master only (1)	0.800625	26	No	No	0	No Discrimination	No	No	No	Yes	No	No	No	No	1	Some Information	35-49	seconedu	urban	paid	Male
master only (1)	0.806166	26	No	No	0	No Discrimination	No	No	No	Yes	No	Yes	No	Yes	3	Some Information	35-49	seconedu	urban	paid	Male
master only (1)	0.813983	26	No	No	0	No Discrimination	No	No	No	Yes	No	Yes	No	No	2	Some Information	35-49	primaryedu	urban	paid	Male
master only (1)	0.818021	49	No	No	0	No Discrimination	Yes	No	Yes	Yes	No	No	No	No	3	Some Information	35-49	highedu	rural	paid	Male
master only (1)	0.833587	21	No	No	0	No Discrimination	No	No	No	Yes	No	No	No	No	1	Some Information	25-34	seconedu	urban	paid	Male
master only (1)	0.835207	49	No	No	0	No Discrimination	No	No	No	Yes	No	No	No	No	1	Some Information	35-49	seconedu	rural	no paid	Male
master only (1)	0.850206	26	No	No	0	No Discrimination	Yes	No	Yes	Yes	No	No	No	No	3	Some Information	35-49	highedu	urban	paid	Male
master only (1)	0.85082	30	No	No	0	No Discrimination	Yes	Yes	Yes	Yes	No	No	No	No	4	More Information	25-34	highedu	urban	paid	Male
master only (1)	0.863637	39	No	No	0	No Discrimination	No	No	No	No	No	No	No	No	0	No Information	35-49	primaryedu	rural	paid	Male
master only (1)	0.864486	35	No	No	0	No Discrimination	No	No	No	Yes	No	No	No	No	1	Some Information	25-34	seconedu	rural	paid	Male
master only (1)	0.864537	15	No	No	0	No Discrimination	Yes	No	No	Yes	No	No	No	No	2	Some Information	25-34	seconedu	urban	paid	Male
master only (1)	0.875613	49	No	No	0	No Discrimination	No	No	No	Yes	No	No	No	No	1	Some Information	25-34	seconedu	rural	no paid	Male
master only (1)	0.878629	32	No	No	0	No Discrimination	No	Yes	Yes	Yes	No	No	No	No	3	Some Information	50-54	highedu	urban	paid	Male
master only (1)	0.886404	32	No	No	0	No Discrimination	Yes	No	No	Yes	No	No	No	No	2	Some Information	25-34	seconedu	urban	paid	Male
master only (1)	0.892081	35	No	No	0	No Discrimination	Yes	No	No	Yes	Yes	No	No	No	3	Some Information	35-49	highedu	rural	paid	Male
master only (1)	0.898169	26	No	No	0	No Discrimination	Yes	No	No	Yes	No	Yes	No	No	3	Some Information	50-54	seconedu	urban	no paid	Male
master only (1)	0.913655	26	No	No	0	No Discrimination	No	No	No	Yes	No	No	No	No	1	Some Information	35-49	seconedu	urban	paid	Male
master only (1)	0.9225	21	No	No	0	No Discrimination	Yes	No	No	Yes	No	No	No	No	2	Some Information	50-54	highedu	urban	paid	Male
master only (1)	0.927586	48	No	No	0	No Discrimination	No	No	Yes	Yes	No	No	No	No	2	Some Information	35-49	seconedu	urban	paid	Male
master only (1)	0.927586	48	No	No	0	No Discrimination	No	No	No	Yes	No	No	No	No	1	Some Information	50-54	seconedu	urban	paid	Male
master only (1)	0.940793	26	No	No	0	No Discrimination	Yes	No	Yes	Yes	No	No	No	Yes	4	More Information	25-34	seconedu	urban	paid	Male
master only (1)	0.951689	21	No	No	0	No Discrimination	No	No	No	Yes	No	No	No	No	1	Some Information	35-49	seconedu	urban	paid	Male
master only (1)	0.951689	21	No	No	0	No Discrimination	No	No	No	Yes	No	No	No	No	1	Some Information	25-34	primaryedu	urban	paid	Male
master only (1)	0.963245	21	No	No	0	No Discrimination	No	No	Yes	Yes	No	No	No	No	2	Some Information	35-49	highedu	urban	paid	Male
master only (1)	0.963546	21	No	No	0	No Discrimination	No	No	No	Yes	No	Yes	No	No	2	Some Information	35-49	seconedu	urban	paid	Male
master only (1)	0.986703	8	No	No	0	No Discrimination	No	No	No	Yes	No	No	No	No	1	Some Information	25-34	seconedu	rural	paid	Male
master only (1)	1.00802	10	No	No	0	No Discrimination	Yes	No	No	Yes	No	No	No	No	2	Some Information	35-49	seconedu	rural	paid	Male
master only (1)	1.03639	26	No	No	0	No Discrimination	No	No	Yes	Yes	No	No	No	Yes	3	Some Information	25-34	seconedu	urban	paid	Male
master only (1)	1.03639	26	No	No	0	No Discrimination	No	Yes	No	Yes	No	No	No	No	2	Some Information	35-49	seconedu	urban	paid	Male
master only (1)	1.06747	5	No	No	0	No Discrimination	No	No	No	Yes	No	No	No	No	1	Some Information	50-54	seconedu	urban	paid	Male
master only (1)	1.07483	18	No	No	0	No Discrimination	No	Yes	No	Yes	No	No	No	No	2	Some Information	35-49	seconedu	rural	paid	Male
master only (1)	1.07778	26	No	No	0	No Discrimination	Yes	No	Yes	Yes	No	No	No	Yes	4	More Information	35-49	seconedu	urban	paid	Male
master only (1)	1.07778	26	No	No	0	No Discrimination	No	No	No	Yes	No	Yes	No	No	2	Some Information	50-54	seconedu	urban	paid	Male
master only (1)	1.08564	30	No	No	0	No Discrimination	Yes	Yes	Yes	Yes	No	No	No	No	4	More Information	35-49	seconedu	urban	paid	Male
master only (1)	1.09744	21	No	No	0	No Discrimination	Yes	No	Yes	Yes	No	No	No	No	3	Some Information	50-54	highedu	urban	paid	Male
master only (1)	1.10068	39	No	No	0	No Discrimination	No	No	No	No	No	No	No	No	0	No Information	25-34	primaryedu	rural	no paid	Male
master only (1)	1.10653	39	No	No	0	No Discrimination	No	No	No	Yes	Yes	No	No	No	2	Some Information	25-34	seconedu	rural	paid	Male
master only (1)	1.10653	39	No	No	0	No Discrimination	No	No	No	Yes	Yes	No	No	No	2	Some Information	25-34	seconedu	rural	paid	Male
master only (1)	1.10653	39	No	No	0	No Discrimination	No	No	No	Yes	Yes	No	No	No	2	Some Information	50-54	seconedu	rural	paid	Male
master only (1)	1.1167	30	No	No	0	No Discrimination	No	Yes	Yes	Yes	No	No	No	No	3	Some Information	35-49	seconedu	urban	paid	Male
master only (1)	1.12767	30	No	No	0	No Discrimination	No	No	No	Yes	No	No	No	No	1	Some Information	25-34	seconedu	urban	paid	Male
master only (1)	1.13089	10	No	No	0	No Discrimination	Yes	No	Yes	Yes	No	No	No	No	3	Some Information	50-54	seconedu	rural	paid	Male
master only (1)	1.13877	38	No	No	0	No Discrimination	No	No	No	Yes	Yes	Yes	No	No	3	Some Information	35-49	highedu	urban	paid	Male
master only (1)	1.14339	21	No	No	0	No Discrimination	Yes	No	No	Yes	No	No	No	No	2	Some Information	25-34	seconedu	urban	paid	Male
master only (1)	1.1579	38	No	No	0	No Discrimination	No	No	No	Yes	No	No	No	No	1	Some Information	25-34	seconedu	urban	paid	Male
master only (1)	1.16062	22	No	No	0	No Discrimination	Yes	No	No	No	No	No	No	No	1	Some Information	35-49	highedu	urban	paid	Male
master only (1)	1.16828	26	No	No	0	No Discrimination	No	No	No	Yes	No	No	No	Yes	2	Some Information	35-49	seconedu	urban	paid	Male
master only (1)	1.18922	4	No	No	0	No Discrimination	No	Yes	Yes	Yes	No	No	No	No	3	Some Information	25-34	seconedu	rural	no paid	Male
master only (1)	1.19658	4	No	No	0	No Discrimination	No	No	No	Yes	No	No	No	No	1	Some Information	35-49	seconedu	rural	paid	Male
master only (1)	1.21372	22	No	No	0	No Discrimination	Yes	No	Yes	No	No	No	No	Yes	3	Some Information	25-34	seconedu	urban	paid	Male
master only (1)	1.23462	21	No	No	0	No Discrimination	Yes	No	No	Yes	No	No	No	No	2	Some Information	35-49	highedu	urban	paid	Male
master only (1)	1.23462	21	No	No	0	No Discrimination	Yes	No	No	Yes	No	No	No	No	2	Some Information	35-49	highedu	urban	paid	Male
master only (1)	1.24464	21	No	No	0	No Discrimination	Yes	No	No	Yes	No	No	No	No	2	Some Information	35-49	seconedu	urban	paid	Male
master only (1)	1.24736	21	No	No	0	No Discrimination	Yes	No	Yes	Yes	No	No	No	No	3	Some Information	25-34	highedu	urban	paid	Male
master only (1)	1.25728	39	No	No	0	No Discrimination	No	No	No	Yes	No	No	No	No	1	Some Information	25-34	seconedu	rural	paid	Male
master only (1)	1.25728	39	No	No	0	No Discrimination	No	No	No	Yes	No	No	No	No	1	Some Information	35-49	primaryedu	rural	paid	Male
master only (1)	1.26895	30	No	No	0	No Discrimination	No	Yes	No	Yes	No	No	No	No	2	Some Information	25-34	seconedu	urban	paid	Male
master only (1)	1.27609	24	No	No	0	No Discrimination	No	No	No	Yes	Yes	Yes	No	No	3	Some Information	50-54	seconedu	urban	paid	Male
master only (1)	1.29634	30	No	No	0	No Discrimination	Yes	Yes	Yes	Yes	No	No	No	No	4	More Information	35-49	seconedu	urban	paid	Male
master only (1)	1.30811	22	No	No	0	No Discrimination	No	No	No	Yes	No	No	No	No	1	Some Information	25-34	seconedu	urban	paid	Male
master only (1)	1.3116	22	No	No	0	No Discrimination	Yes	No	No	Yes	No	No	No	No	2	Some Information	25-34	highedu	urban	paid	Male
master only (1)	1.32423	21	No	No	0	No Discrimination	Yes	Yes	No	Yes	Yes	No	No	No	4	More Information	35-49	highedu	urban	paid	Male
master only (1)	1.33716	22	No	No	0	No Discrimination	No	No	No	Yes	Yes	No	No	No	2	Some Information	35-49	primaryedu	urban	paid	Male
master only (1)	1.36169	21	No	No	0	No Discrimination	No	No	No	Yes	No	No	No	No	1	Some Information	25-34	seconedu	urban	paid	Male
master only (1)	1.36608	16	No	No	0	No Discrimination	No	No	No	Yes	No	No	No	No	1	Some Information	25-34	seconedu	rural	paid	Male
master only (1)	1.37407	22	No	No	0	No Discrimination	Yes	No	Yes	Yes	Yes	Yes	No	No	5	More Information	50-54	highedu	urban	no paid	Male
master only (1)	1.37407	30	No	No	0	No Discrimination	No	No	No	Yes	No	No	No	No	1	Some Information	35-49	seconedu	urban	paid	Male
master only (1)	1.37407	30	No	No	0	No Discrimination	Yes	No	No	Yes	No	No	No	No	2	Some Information	25-34	seconedu	urban	paid	Male
master only (1)	1.37727	22	No	No	0	No Discrimination	No	Yes	No	Yes	No	No	No	No	2	Some Information	35-49	seconedu	urban	paid	Male
master only (1)	1.37727	22	No	No	0	No Discrimination	Yes	No	No	Yes	No	No	No	No	2	Some Information	25-34	seconedu	urban	paid	Male
master only (1)	1.38741	22	No	No	0	No Discrimination	Yes	No	No	Yes	No	No	No	No	2	Some Information	35-49	primaryedu	urban	paid	Male
master only (1)	1.38954	28	No	No	0	No Discrimination	No	Yes	Yes	Yes	No	No	No	No	3	Some Information	35-49	seconedu	urban	paid	Male
master only (1)	1.39057	24	No	No	0	No Discrimination	Yes	Yes	Yes	Yes	No	No	No	No	4	More Information	35-49	highedu	urban	paid	Male
master only (1)	1.39081	16	No	No	0	No Discrimination	No	No	No	Yes	No	No	No	No	1	Some Information	35-49	seconedu	rural	paid	Male
master only (1)	1.39414	22	No	No	0	No Discrimination	No	No	Yes	Yes	No	No	No	No	2	Some Information	35-49	seconedu	urban	paid	Male
master only (1)	1.41299	6	No	No	0	No Discrimination	No	No	No	Yes	No	No	No	No	1	Some Information	15-24	seconedu	rural	paid	Male
master only (1)	1.43214	16	No	No	0	No Discrimination	No	No	No	Yes	No	No	No	No	1	Some Information	35-49	seconedu	rural	paid	Male
master only (1)	1.46814	22	No	No	0	No Discrimination	Yes	Yes	Yes	Yes	No	No	No	No	4	More Information	35-49	highedu	urban	paid	Male
master only (1)	1.46814	22	No	No	0	No Discrimination	Yes	No	No	Yes	No	No	No	No	2	Some Information	35-49	seconedu	urban	paid	Male
master only (1)	1.47679	28	No	No	0	No Discrimination	No	No	No	Yes	No	No	No	No	1	Some Information	25-34	seconedu	urban	paid	Male
master only (1)	1.47679	28	No	No	0	No Discrimination	Yes	No	Yes	Yes	No	No	No	No	3	Some Information	35-49	highedu	urban	paid	Male
master only (1)	1.47948	22	No	No	0	No Discrimination	No	No	No	Yes	No	No	No	No	1	Some Information	35-49	seconedu	urban	paid	Male
master only (1)	1.49738	28	No	No	0	No Discrimination	No	No	No	Yes	No	No	No	No	1	Some Information	25-34	seconedu	urban	paid	Male
master only (1)	1.49738	28	No	No	0	No Discrimination	Yes	No	Yes	No	No	No	No	No	2	Some Information	35-49	highedu	urban	paid	Male
master only (1)	1.49739	24	No	No	0	No Discrimination	Yes	Yes	Yes	Yes	No	No	No	Yes	5	More Information	25-34	seconedu	urban	paid	Male
master only (1)	1.50017	31	No	No	0	No Discrimination	No	Yes	No	Yes	No	No	No	No	2	Some Information	25-34	seconedu	rural	paid	Male
master only (1)	1.51456	12	No	No	0	No Discrimination	No	No	No	Yes	No	No	No	No	1	Some Information	25-34	seconedu	rural	paid	Male
master only (1)	1.52908	22	No	No	0	No Discrimination	Yes	Yes	No	Yes	No	No	No	No	3	Some Information	35-49	highedu	urban	paid	Male
master only (1)	1.53133	28	No	No	0	No Discrimination	No	No	No	Yes	No	No	No	No	1	Some Information	35-49	highedu	urban	paid	Male
master only (1)	1.55346	24	No	No	0	No Discrimination	No	No	No	Yes	No	No	No	No	1	Some Information	50-54	seconedu	urban	paid	Male
master only (1)	1.55463	16	No	No	0	No Discrimination	No	No	No	Yes	No	No	No	No	1	Some Information	35-49	primaryedu	rural	paid	Male
master only (1)	1.58117	12	No	No	0	No Discrimination	No	Yes	No	Yes	No	No	No	No	2	Some Information	25-34	seconedu	rural	paid	Male
master only (1)	1.58151	22	No	No	0	No Discrimination	Yes	No	No	Yes	No	No	No	No	2	Some Information	25-34	seconedu	urban	paid	Male
master only (1)	1.58176	12	No	No	0	No Discrimination	No	No	No	Yes	No	No	No	No	1	Some Information	35-49	seconedu	rural	paid	Male
master only (1)	1.58525	28	No	No	0	No Discrimination	Yes	No	Yes	Yes	No	No	No	No	3	Some Information	25-34	seconedu	urban	paid	Male
master only (1)	1.58907	28	No	No	0	No Discrimination	Yes	Yes	No	Yes	Yes	No	No	No	4	More Information	25-34	highedu	urban	paid	Male
master only (1)	1.59009	27	No	No	0	No Discrimination	Yes	No	No	Yes	Yes	No	No	No	3	Some Information	35-49	highedu	rural	paid	Male
master only (1)	1.59009	27	No	No	0	No Discrimination	Yes	No	No	Yes	No	No	No	No	2	Some Information	50-54	seconedu	rural	paid	Male
master only (1)	1.6219	22	No	No	0	No Discrimination	No	Yes	No	Yes	Yes	No	No	No	3	Some Information	50-54	highedu	urban	paid	Male
master only (1)	1.62551	21	No	No	0	No Discrimination	Yes	No	No	Yes	No	No	No	No	2	Some Information	35-49	highedu	urban	paid	Male
master only (1)	1.63025	22	No	No	0	No Discrimination	Yes	Yes	No	Yes	No	No	No	No	3	Some Information	35-49	highedu	urban	paid	Male
master only (1)	1.64357	24	No	No	0	No Discrimination	No	No	No	Yes	No	No	No	No	1	Some Information	25-34	seconedu	urban	paid	Male
master only (1)	1.68168	25	No	No	0	No Discrimination	No	No	No	Yes	No	No	No	No	1	Some Information	25-34	seconedu	rural	paid	Male
master only (1)	1.68846	28	No	No	0	No Discrimination	No	No	No	Yes	No	No	No	No	1	Some Information	50-54	primaryedu	urban	paid	Male
master only (1)	1.70535	28	No	No	0	No Discrimination	Yes	No	No	Yes	No	No	No	No	2	Some Information	25-34	seconedu	urban	no paid	Male
master only (1)	1.70535	28	No	No	0	No Discrimination	No	No	No	Yes	No	No	No	No	1	Some Information	35-49	seconedu	urban	paid	Male
master only (1)	1.70818	24	No	No	0	No Discrimination	No	No	No	Yes	No	No	No	No	1	Some Information	35-49	seconedu	urban	paid	Male
master only (1)	1.72804	22	No	No	0	No Discrimination	No	No	No	Yes	No	No	No	No	1	Some Information	35-49	seconedu	urban	paid	Male
master only (1)	1.72956	22	No	No	0	No Discrimination	No	Yes	No	Yes	No	No	No	No	2	Some Information	35-49	seconedu	urban	paid	Male
master only (1)	1.76736	28	No	No	0	No Discrimination	No	No	No	Yes	No	No	No	No	1	Some Information	35-49	seconedu	urban	paid	Male
master only (1)	1.7692	27	No	No	0	No Discrimination	Yes	No	Yes	Yes	No	Yes	No	No	4	More Information	25-34	highedu	rural	paid	Male
master only (1)	1.7692	27	No	No	0	No Discrimination	No	No	Yes	Yes	No	Yes	No	Yes	4	More Information	15-24	seconedu	rural	paid	Male
master only (1)	1.79366	25	No	No	0	No Discrimination	No	No	No	Yes	No	No	No	No	1	Some Information	25-34	seconedu	rural	paid	Male
master only (1)	1.82512	24	No	No	0	No Discrimination	No	Yes	No	Yes	No	No	No	No	2	Some Information	35-49	seconedu	urban	paid	Male
master only (1)	1.82512	24	No	No	0	No Discrimination	Yes	No	Yes	Yes	No	No	No	No	3	Some Information	25-34	seconedu	urban	paid	Male
master only (1)	1.83472	27	No	No	0	No Discrimination	No	No	No	Yes	No	No	No	Yes	2	Some Information	15-24	seconedu	rural	paid	Male
master only (1)	1.84027	22	No	No	0	No Discrimination	No	Yes	Yes	Yes	No	No	No	No	3	Some Information	50-54	seconedu	urban	paid	Male
master only (1)	1.87233	25	No	No	0	No Discrimination	No	Yes	No	No	Yes	No	No	No	2	Some Information	25-34	seconedu	rural	paid	Male
master only (1)	1.90968	22	No	No	0	No Discrimination	No	No	No	Yes	No	No	No	No	1	Some Information	35-49	seconedu	urban	paid	Male
master only (1)	1.91064	25	No	No	0	No Discrimination	Yes	No	Yes	Yes	Yes	No	No	No	4	More Information	35-49	highedu	rural	paid	Male
master only (1)	1.91648	28	No	No	0	No Discrimination	No	No	No	No	No	No	No	No	0	No Information	25-34	seconedu	urban	no paid	Male
master only (1)	1.95887	25	No	No	0	No Discrimination	Yes	No	Yes	Yes	No	No	No	No	3	Some Information	35-49	seconedu	rural	paid	Male
master only (1)	1.95914	25	No	No	0	No Discrimination	No	No	No	Yes	No	No	No	No	1	Some Information	35-49	primaryedu	rural	paid	Male
master only (1)	1.96181	25	No	No	0	No Discrimination	Yes	No	Yes	Yes	No	No	No	No	3	Some Information	25-34	seconedu	rural	paid	Male
master only (1)	1.96396	29	No	No	0	No Discrimination	No	No	No	Yes	No	No	No	No	1	Some Information	25-34	seconedu	rural	paid	Male
master only (1)	2.01541	28	No	No	0	No Discrimination	Yes	No	No	Yes	No	No	No	No	2	Some Information	35-49	seconedu	urban	paid	Male
master only (1)	2.03857	25	No	No	0	No Discrimination	No	No	Yes	Yes	No	No	No	No	2	Some Information	25-34	primaryedu	rural	paid	Male
master only (1)	2.0789	24	No	No	0	No Discrimination	Yes	No	No	Yes	No	No	No	No	2	Some Information	25-34	seconedu	urban	paid	Male
master only (1)	2.08585	24	No	No	0	No Discrimination	No	No	No	Yes	No	No	No	No	1	Some Information	35-49	seconedu	urban	paid	Male
master only (1)	2.10197	29	No	No	0	No Discrimination	Yes	No	No	Yes	No	No	No	No	2	Some Information	35-49	seconedu	rural	paid	Male
master only (1)	2.13496	25	No	No	0	No Discrimination	Yes	No	No	Yes	No	Yes	No	No	3	Some Information	25-34	seconedu	rural	paid	Male
master only (1)	2.16625	28	No	No	0	No Discrimination	No	No	Yes	Yes	No	No	No	No	2	Some Information	35-49	seconedu	urban	paid	Male
master only (1)	2.18384	29	No	No	0	No Discrimination	Yes	No	No	Yes	Yes	No	No	No	3	Some Information	25-34	seconedu	rural	paid	Male
master only (1)	2.18736	29	No	No	0	No Discrimination	No	No	Yes	Yes	No	No	No	No	2	Some Information	25-34	seconedu	rural	paid	Male
master only (1)	2.19277	26	No	No	0	No Discrimination	Yes	No	No	Yes	Yes	Yes	No	No	4	More Information	35-49	highedu	urban	paid	Male
master only (1)	2.19277	26	No	No	0	No Discrimination	Yes	No	Yes	Yes	No	Yes	No	Yes	5	More Information	25-34	highedu	urban	paid	Male
master only (1)	2.19277	26	No	No	0	No Discrimination	Yes	No	No	Yes	No	No	No	No	2	Some Information	25-34	highedu	urban	paid	Male
master only (1)	2.19277	26	No	No	0	No Discrimination	Yes	No	No	Yes	No	Yes	No	No	3	Some Information	25-34	highedu	urban	paid	Male
master only (1)	2.21968	25	No	No	0	No Discrimination	No	No	No	Yes	No	No	No	No	1	Some Information	35-49	primaryedu	rural	paid	Male
master only (1)	2.23061	29	No	No	0	No Discrimination	No	No	Yes	Yes	No	No	No	No	2	Some Information	35-49	seconedu	rural	paid	Male
master only (1)	2.26626	29	No	No	0	No Discrimination	Yes	Yes	No	Yes	No	No	No	No	3	Some Information	25-34	seconedu	rural	paid	Male
master only (1)	2.27777	29	No	No	0	No Discrimination	Yes	No	Yes	Yes	No	No	No	No	3	Some Information	35-49	seconedu	rural	paid	Male
master only (1)	2.33753	25	No	No	0	No Discrimination	No	No	No	No	No	No	No	No	0	No Information	35-49	primaryedu	rural	paid	Male
master only (1)	2.34988	11	No	No	0	No Discrimination	Yes	No	Yes	Yes	No	No	No	No	3	Some Information	35-49	highedu	urban	paid	Male
master only (1)	2.44418	23	No	No	0	No Discrimination	No	Yes	No	Yes	Yes	No	No	No	3	Some Information	25-34	seconedu	rural	paid	Male
master only (1)	2.5296	28	No	No	0	No Discrimination	No	No	No	Yes	No	No	No	No	1	Some Information	35-49	primaryedu	urban	paid	Male
master only (1)	2.66456	23	No	No	0	No Discrimination	No	Yes	No	Yes	No	No	No	No	2	Some Information	50-54	primaryedu	rural	paid	Male
master only (1)	2.74537	23	No	No	0	No Discrimination	Yes	No	No	Yes	No	No	No	Yes	3	Some Information	25-34	highedu	rural	paid	Male
master only (1)	2.84405	22	No	No	0	No Discrimination	No	No	No	Yes	No	No	No	No	1	Some Information	35-49	highedu	urban	paid	Male
master only (1)	3.43234	23	No	No	0	No Discrimination	No	Yes	No	Yes	No	No	No	No	2	Some Information	50-54	highedu	rural	paid	Male
master only (1)	3.57812	23	No	No	0	No Discrimination	No	No	No	Yes	Yes	No	No	No	2	Some Information	35-49	primaryedu	rural	paid	Male
master only (1)	5.2228	22	No	No	0	No Discrimination	No	No	Yes	Yes	No	No	No	No	2	Some Information	35-49	primaryedu	urban	paid	Male
master only (1)	0.186505	54	No	No	0	No Discrimination	Yes	No	Yes	Yes	Yes	No	No	No	4	More Information	25-34	highedu	urban	paid	Male
master only (1)	0.257204	36	No	No	0	No Discrimination	Yes	No	Yes	Yes	No	Yes	No	No	4	More Information	35-49	seconedu	urban	paid	Male
master only (1)	0.354439	40	No	No	0	No Discrimination	No	Yes	Yes	Yes	No	No	No	No	3	Some Information	25-34	seconedu	urban	paid	Male
master only (1)	0.37754	55	No	No	0	No Discrimination	No	No	No	Yes	No	No	No	No	1	Some Information	25-34	seconedu	rural	paid	Male
master only (1)	0.443812	13	No	No	0	No Discrimination	No	No	No	No	No	No	No	No	0	No Information	25-34	primaryedu	urban	paid	Male
master only (1)	0.542197	5	No	No	0	No Discrimination	Yes	Yes	Yes	Yes	No	No	No	Yes	5	More Information	50-54	highedu	urban	paid	Male
master only (1)	0.886404	32	No	No	0	No Discrimination	No	Yes	No	Yes	No	Yes	No	Yes	4	More Information	35-49	seconedu	urban	paid	Male
master only (1)	1.01385	8	No	No	0	No Discrimination	No	No	Yes	Yes	No	No	No	No	2	Some Information	35-49	highedu	rural	paid	Male
master only (1)	1.07154	4	No	No	0	No Discrimination	No	Yes	No	Yes	Yes	No	No	No	3	Some Information	35-49	seconedu	rural	paid	Male
master only (1)	1.10161	22	No	No	0	No Discrimination	No	No	No	Yes	No	No	No	No	1	Some Information	35-49	primaryedu	urban	paid	Male
master only (1)	1.1201	30	No	No	0	No Discrimination	No	No	No	Yes	No	No	No	No	1	Some Information	25-34	seconedu	urban	paid	Male
master only (1)	1.12767	30	No	No	0	No Discrimination	No	No	No	Yes	No	No	No	No	1	Some Information	35-49	primaryedu	urban	paid	Male
master only (1)	1.28409	22	No	No	0	No Discrimination	Yes	No	No	Yes	No	No	No	No	2	Some Information	35-49	seconedu	urban	paid	Male
master only (1)	1.36436	22	No	No	0	No Discrimination	No	No	No	Yes	No	No	No	No	1	Some Information	35-49	primaryedu	urban	paid	Male
master only (1)	1.40994	22	No	No	0	No Discrimination	No	No	No	Yes	No	No	No	No	1	Some Information	25-34	primaryedu	urban	paid	Male
master only (1)	1.44433	22	No	No	0	No Discrimination	No	Yes	No	Yes	No	No	No	No	2	Some Information	35-49	highedu	urban	paid	Male
master only (1)	1.44792	7	No	No	0	No Discrimination	Yes	No	No	Yes	No	No	No	No	2	Some Information	25-34	seconedu	urban	paid	Male
master only (1)	1.55414	16	No	No	0	No Discrimination	No	No	No	Yes	No	No	No	No	1	Some Information	35-49	primaryedu	rural	paid	Male
master only (1)	1.61011	22	No	No	0	No Discrimination	No	Yes	No	Yes	No	No	No	No	2	Some Information	35-49	seconedu	urban	paid	Male
master only (1)	1.67059	22	No	No	0	No Discrimination	No	No	No	Yes	No	No	No	No	1	Some Information	35-49	seconedu	urban	paid	Male
master only (1)	1.72721	28	No	No	0	No Discrimination	No	Yes	No	Yes	No	No	No	No	2	Some Information	50-54	seconedu	urban	paid	Male
master only (1)	1.83325	25	No	No	0	No Discrimination	No	No	No	Yes	No	No	No	No	1	Some Information	25-34	seconedu	rural	paid	Male
master only (1)	1.90968	22	No	No	0	No Discrimination	No	No	No	Yes	No	No	No	No	1	Some Information	35-49	seconedu	urban	paid	Male
master only (1)	3.57812	23	No	No	0	No Discrimination	No	No	No	Yes	No	No	No	No	1	Some Information	35-49	seconedu	rural	paid	Male
master only (1)	5.2228	22	No	No	0	No Discrimination	No	No	Yes	Yes	No	No	No	No	2	Some Information	35-49	seconedu	urban	paid	Male
master only (1)	0.449197	18	No	No	0	No Discrimination	Yes	No	Yes	No	Yes	No	No	No	3	Some Information	35-49	highedu	rural	paid	Male
master only (1)	0.467135	51	No	No	0	No Discrimination	No	No	No	Yes	No	No	No	No	1	Some Information	50-54	primaryedu	rural	paid	Male
master only (1)	0.563083	51	No	No	0	No Discrimination	Yes	No	Yes	Yes	No	No	No	No	3	Some Information	50-54	highedu	rural	paid	Male
master only (1)	0.79273	26	No	No	0	No Discrimination	Yes	No	Yes	Yes	No	Yes	No	Yes	5	More Information	35-49	highedu	urban	paid	Male
master only (1)	0.813625	3	No	No	0	No Discrimination	No	No	Yes	Yes	No	No	No	No	2	Some Information	35-49	seconedu	urban	paid	Male
master only (1)	1.26895	30	No	No	0	No Discrimination	No	No	Yes	Yes	No	No	No	No	2	Some Information	35-49	seconedu	urban	paid	Male
master only (1)	1.33512	12	No	No	0	No Discrimination	No	No	No	No	No	No	No	No	0	No Information	35-49	seconedu	rural	paid	Male
master only (1)	1.95737	25	No	No	0	No Discrimination	No	No	No	Yes	No	Yes	No	No	2	Some Information	35-49	seconedu	rural	paid	Male
master only (1)	0.17987	63	No	No	0	No Discrimination	No	No	No	No	No	No	No	Yes	1	Some Information	25-34	seconedu	rural	no paid	Male
master only (1)	0.237927	19	No	No	0	No Discrimination	Yes	No	No	No	No	No	No	No	1	Some Information	25-34	seconedu	urban	paid	Male
master only (1)	0.607829	52	No	No	0	No Discrimination	No	No	Yes	Yes	No	No	No	No	2	Some Information	35-49	seconedu	urban	paid	Male
master only (1)	1.16062	22	No	No	0	No Discrimination	Yes	No	No	No	No	No	No	No	1	Some Information	35-49	highedu	urban	paid	Male
master only (1)	1.19268	30	No	No	0	No Discrimination	No	No	No	Yes	No	No	No	No	1	Some Information	35-49	seconedu	urban	paid	Male
master only (1)	1.44975	30	No	No	0	No Discrimination	No	Yes	Yes	Yes	No	No	No	No	3	Some Information	35-49	seconedu	urban	paid	Male
master only (1)	1.58907	28	No	No	0	No Discrimination	No	No	No	No	No	No	No	No	0	No Information	35-49	highedu	urban	paid	Male
master only (1)	1.90996	12	No	No	0	No Discrimination	No	No	Yes	Yes	No	No	No	No	2	Some Information	25-34	seconedu	rural	paid	Male
master only (1)	0.255774	63	No	No	0	No Discrimination	No	No	No	No	No	No	No	No	0	No Information	25-34	seconedu	rural	paid	Male
master only (1)	0.287145	60	No	No	0	No Discrimination	No	No	Yes	No	No	No	No	No	1	Some Information	35-49	seconedu	urban	paid	Male
master only (1)	0.439098	17	No	No	0	No Discrimination	Yes	No	No	Yes	No	No	No	No	2	Some Information	25-34	primaryedu	urban	paid	Male
master only (1)	0.49806	51	No	No	0	No Discrimination	No	No	No	Yes	No	No	No	No	1	Some Information	35-49	primaryedu	rural	paid	Male
master only (1)	0.530908	5	No	No	0	No Discrimination	No	No	Yes	Yes	No	No	No	No	2	Some Information	50-54	highedu	urban	paid	Male
master only (1)	0.953287	7	No	No	0	No Discrimination	No	No	No	Yes	No	No	No	No	1	Some Information	35-49	seconedu	urban	paid	Male
master only (1)	0.997611	3	No	No	0	No Discrimination	No	No	Yes	Yes	No	No	No	No	2	Some Information	25-34	seconedu	urban	paid	Male
master only (1)	1.01713	4	No	No	0	No Discrimination	No	No	No	Yes	No	No	No	No	1	Some Information	35-49	primaryedu	rural	paid	Male
master only (1)	1.07638	12	No	No	0	No Discrimination	Yes	No	Yes	Yes	No	No	No	No	3	Some Information	25-34	highedu	rural	paid	Male
master only (1)	1.12808	8	No	No	0	No Discrimination	No	Yes	No	Yes	No	No	No	No	2	Some Information	35-49	highedu	rural	paid	Male
master only (1)	1.17969	8	No	No	0	No Discrimination	No	No	No	Yes	No	No	No	No	1	Some Information	50-54	seconedu	rural	paid	Male
master only (1)	1.20593	8	No	No	0	No Discrimination	No	No	No	Yes	No	No	No	No	1	Some Information	35-49	seconedu	rural	paid	Male
master only (1)	1.30895	12	No	No	0	No Discrimination	Yes	No	Yes	Yes	No	No	No	No	3	Some Information	35-49	seconedu	rural	paid	Male
master only (1)	1.31592	8	No	No	0	No Discrimination	Yes	No	Yes	Yes	Yes	No	No	No	4	More Information	25-34	highedu	rural	paid	Male
master only (1)	1.34993	24	No	No	0	No Discrimination	Yes	No	Yes	Yes	No	No	No	No	3	Some Information	35-49	highedu	urban	paid	Male
master only (1)	1.37589	12	No	No	0	No Discrimination	No	No	No	No	No	No	No	No	0	No Information	35-49	seconedu	rural	paid	Male
master only (1)	1.52908	22	No	No	0	No Discrimination	No	Yes	Yes	Yes	Yes	No	No	No	4	More Information	50-54	highedu	urban	paid	Male
master only (1)	1.53338	28	No	No	0	No Discrimination	Yes	No	No	Yes	Yes	No	No	No	3	Some Information	25-34	seconedu	urban	no paid	Male
master only (1)	1.90968	22	No	No	0	No Discrimination	Yes	No	Yes	Yes	No	No	No	No	3	Some Information	35-49	seconedu	urban	paid	Male
master only (1)	2.12078	25	No	No	0	No Discrimination	Yes	Yes	Yes	Yes	Yes	No	No	No	5	More Information	35-49	seconedu	rural	paid	Male
master only (1)	0.19036	65	No	No	0	No Discrimination	No	No	No	Yes	No	No	No	No	1	Some Information	35-49	primaryedu	rural	paid	Male
master only (1)	0.269546	64	No	No	0	No Discrimination	No	Yes	No	Yes	Yes	Yes	No	No	4	More Information	50-54	highedu	urban	paid	Male
master only (1)	0.304881	36	No	No	0	No Discrimination	No	No	No	Yes	No	No	No	No	1	Some Information	35-49	primaryedu	urban	paid	Male
master only (1)	0.313364	50	No	No	0	No Discrimination	No	No	No	No	No	Yes	No	No	1	Some Information	25-34	seconedu	urban	paid	Male
master only (1)	0.416771	2	No	No	0	No Discrimination	No	Yes	Yes	Yes	No	No	No	No	3	Some Information	35-49	seconedu	rural	paid	Male
master only (1)	0.427313	37	No	No	0	No Discrimination	No	No	No	Yes	Yes	No	No	No	2	Some Information	25-34	seconedu	rural	paid	Male
master only (1)	0.708904	3	No	No	0	No Discrimination	No	No	No	No	No	No	No	No	0	No Information	35-49	seconedu	urban	paid	Male
master only (1)	0.878629	32	No	No	0	No Discrimination	No	Yes	Yes	Yes	No	Yes	No	No	4	More Information	35-49	seconedu	urban	paid	Male
master only (1)	0.879669	21	No	No	0	No Discrimination	No	No	No	Yes	No	No	No	No	1	Some Information	35-49	seconedu	urban	paid	Male
master only (1)	0.880747	3	No	No	0	No Discrimination	No	No	No	No	No	Yes	No	No	1	Some Information	35-49	seconedu	urban	paid	Male
master only (1)	1.1827	30	No	No	0	No Discrimination	No	No	No	Yes	No	No	No	No	1	Some Information	50-54	seconedu	urban	paid	Male
master only (1)	1.98247	25	No	No	0	No Discrimination	No	No	No	Yes	No	No	No	No	1	Some Information	35-49	seconedu	rural	paid	Male
master only (1)	2.11574	25	No	No	0	No Discrimination	No	Yes	Yes	Yes	No	No	No	No	3	Some Information	35-49	seconedu	rural	paid	Male
master only (1)	2.75594	22	No	No	0	No Discrimination	No	Yes	No	Yes	No	No	No	No	2	Some Information	25-34	seconedu	urban	paid	Male
master only (1)	0.19036	65	No	No	0	No Discrimination	No	No	Yes	Yes	No	No	No	No	2	Some Information	35-49	seconedu	rural	paid	Male
master only (1)	0.233191	65	No	No	0	No Discrimination	No	No	Yes	Yes	No	No	No	No	2	Some Information	50-54	seconedu	rural	paid	Male
master only (1)	1.39445	22	No	No	0	No Discrimination	Yes	No	No	Yes	No	No	No	No	2	Some Information	35-49	highedu	urban	paid	Male
master only (1)	1.70818	24	No	No	0	No Discrimination	No	Yes	No	Yes	No	No	No	No	2	Some Information	25-34	primaryedu	urban	paid	Male
master only (1)	0.101417	60	No	No	0	No Discrimination	Yes	No	Yes	Yes	No	No	No	No	3	Some Information	35-49	highedu	urban	paid	Male
master only (1)	0.280252	44	No	No	0	No Discrimination	No	No	Yes	Yes	No	No	No	No	2	Some Information	35-49	seconedu	urban	paid	Male
master only (1)	0.343516	37	No	No	0	No Discrimination	No	No	No	No	No	No	No	No	0	No Information	25-34	highedu	rural	paid	Male
master only (1)	1.13211	30	No	No	0	No Discrimination	No	No	No	Yes	No	No	No	No	1	Some Information	35-49	primaryedu	urban	paid	Male
master only (1)	1.4868	38	No	No	0	No Discrimination	No	No	No	Yes	No	No	No	Yes	2	Some Information	25-34	seconedu	urban	paid	Male
master only (1)	0.101417	60	No	No	0	No Discrimination	No	No	No	No	No	No	No	Yes	1	Some Information	35-49	seconedu	urban	paid	Male
master only (1)	0.116485	65	No	No	0	No Discrimination	No	No	Yes	Yes	No	No	No	No	2	Some Information	25-34	highedu	rural	paid	Male
master only (1)	0.366077	44	No	No	0	No Discrimination	Yes	No	Yes	Yes	No	No	No	No	3	Some Information	35-49	seconedu	urban	paid	Male
master only (1)	0.489897	44	No	No	0	No Discrimination	Yes	Yes	Yes	Yes	No	No	No	No	4	More Information	25-34	seconedu	urban	paid	Male
master only (1)	0.79273	26	No	No	0	No Discrimination	Yes	No	No	Yes	No	No	No	Yes	3	Some Information	25-34	seconedu	urban	paid	Male
master only (1)	0.79273	26	No	No	0	No Discrimination	No	No	No	Yes	No	No	No	Yes	2	Some Information	35-49	primaryedu	urban	paid	Male
master only (1)	0.813983	26	No	No	0	No Discrimination	No	No	No	Yes	No	No	No	Yes	2	Some Information	35-49	seconedu	urban	no paid	Male
master only (1)	0.813983	26	No	No	0	No Discrimination	Yes	No	No	Yes	No	Yes	No	No	3	Some Information	35-49	seconedu	urban	paid	Male
master only (1)	0.814152	3	No	No	0	No Discrimination	No	No	Yes	Yes	No	No	No	No	2	Some Information	35-49	seconedu	urban	paid	Male
master only (1)	1.02325	53	No	No	0	No Discrimination	No	No	No	Yes	No	No	No	No	1	Some Information	35-49	seconedu	rural	paid	Male
master only (1)	1.07778	26	No	No	0	No Discrimination	No	No	Yes	Yes	Yes	Yes	No	No	4	More Information	35-49	seconedu	urban	paid	Male
master only (1)	1.13211	30	No	No	0	No Discrimination	No	No	No	No	No	No	No	No	0	No Information	35-49	seconedu	urban	paid	Male
master only (1)	1.16828	26	No	No	0	No Discrimination	No	No	No	Yes	No	No	No	Yes	2	Some Information	15-24	seconedu	urban	paid	Male
master only (1)	1.16828	26	No	No	0	No Discrimination	Yes	No	No	Yes	No	No	No	No	2	Some Information	50-54	highedu	urban	no paid	Male
master only (1)	1.18239	4	No	No	0	No Discrimination	No	No	No	Yes	No	No	No	No	1	Some Information	50-54	seconedu	rural	paid	Male
master only (1)	1.18474	21	No	No	0	No Discrimination	No	No	No	Yes	No	No	No	No	1	Some Information	35-49	seconedu	urban	paid	Male
master only (1)	1.29752	3	No	No	0	No Discrimination	No	No	No	Yes	No	No	No	No	1	Some Information	50-54	seconedu	urban	paid	Male
master only (1)	1.52478	28	No	No	0	No Discrimination	Yes	No	No	Yes	No	No	No	No	2	Some Information	25-34	highedu	urban	paid	Male
master only (1)	1.52478	28	No	No	0	No Discrimination	No	No	No	Yes	No	No	No	No	1	Some Information	25-34	seconedu	urban	paid	Male
master only (1)	1.52478	28	No	No	0	No Discrimination	No	No	No	Yes	No	No	No	No	1	Some Information	35-49	seconedu	urban	paid	Male
master only (1)	1.76736	28	No	No	0	No Discrimination	No	No	No	Yes	No	No	No	No	1	Some Information	50-54	highedu	urban	paid	Male
master only (1)	1.76736	28	No	No	0	No Discrimination	No	No	No	No	No	No	No	No	0	No Information	35-49	seconedu	urban	paid	Male
master only (1)	1.76736	28	No	No	0	No Discrimination	No	No	No	Yes	No	No	No	No	1	Some Information	25-34	primaryedu	urban	paid	Male
master only (1)	1.78742	22	No	No	0	No Discrimination	No	No	No	Yes	No	No	No	No	1	Some Information	25-34	seconedu	urban	paid	Male
master only (1)	1.83858	28	No	No	0	No Discrimination	No	No	No	Yes	No	No	No	No	1	Some Information	35-49	seconedu	urban	paid	Male
master only (1)	1.83858	28	No	No	0	No Discrimination	No	No	No	Yes	No	No	No	No	1	Some Information	35-49	seconedu	urban	paid	Male
master only (1)	1.83858	28	No	No	0	No Discrimination	No	No	No	Yes	No	No	No	No	1	Some Information	50-54	seconedu	urban	paid	Male
master only (1)	1.90032	29	No	No	0	No Discrimination	No	No	No	No	No	No	No	No	0	No Information	35-49	primaryedu	rural	paid	Male
master only (1)	1.96396	29	No	No	0	No Discrimination	No	No	No	Yes	No	No	No	No	1	Some Information	50-54	seconedu	rural	paid	Male
master only (1)	2.08835	29	No	No	0	No Discrimination	No	No	No	Yes	No	No	No	No	1	Some Information	50-54	primaryedu	rural	paid	Male
master only (1)	2.10197	29	No	No	0	No Discrimination	No	Yes	Yes	Yes	No	No	No	No	3	Some Information	50-54	seconedu	rural	paid	Male
master only (1)	2.10197	29	No	No	0	No Discrimination	No	No	No	Yes	No	No	No	No	1	Some Information	25-34	seconedu	rural	paid	Male
master only (1)	2.18384	29	No	No	0	No Discrimination	Yes	No	No	Yes	No	No	No	No	2	Some Information	25-34	highedu	rural	paid	Male
master only (1)	2.19277	26	No	No	0	No Discrimination	Yes	No	No	No	No	No	No	Yes	2	Some Information	15-24	seconedu	urban	paid	Male
master only (1)	2.19277	26	No	No	0	No Discrimination	No	No	No	Yes	No	Yes	No	No	2	Some Information	35-49	seconedu	urban	paid	Male
master only (1)	0.275853	54	No	No	0	No Discrimination	No	No	No	Yes	No	No	No	No	1	Some Information	25-34	seconedu	urban	paid	Male
master only (1)	0.286245	65	No	No	0	No Discrimination	No	No	Yes	Yes	No	No	No	No	2	Some Information	35-49	primaryedu	rural	paid	Male
master only (1)	0.404401	2	No	No	0	No Discrimination	No	No	No	Yes	No	No	No	No	1	Some Information	25-34	primaryedu	rural	paid	Male
master only (1)	1.41699	22	No	No	0	No Discrimination	Yes	No	No	Yes	No	No	No	No	2	Some Information	35-49	highedu	urban	paid	Male
master only (1)	0.116133	60	No	No	0	No Discrimination	No	No	No	Yes	No	No	No	No	1	Some Information	35-49	highedu	urban	paid	Male
master only (1)	0.21198	46	No	No	0	No Discrimination	No	No	No	Yes	No	No	No	No	1	Some Information	35-49	seconedu	urban	paid	Male
master only (1)	0.878629	32	No	No	0	No Discrimination	No	No	Yes	Yes	No	Yes	No	No	3	Some Information	35-49	seconedu	urban	paid	Male
master only (1)	0.911905	35	No	No	0	No Discrimination	No	No	No	Yes	No	No	No	No	1	Some Information	25-34	seconedu	rural	no paid	Male
master only (1)	1.70535	28	No	No	0	No Discrimination	No	No	No	No	No	No	No	No	0	No Information	35-49	primaryedu	urban	paid	Male
master only (1)	1.04794	29	No	No	0	No Discrimination	No	No	No	Yes	No	No	No	No	1	Some Information	25-34	seconedu	rural	paid	Male
master only (1)	0.252114	17	No	No	0	No Discrimination	No	No	No	No	No	No	No	No	0	No Information	25-34	seconedu	urban	paid	Male
master only (1)	0.878629	32	No	No	0	No Discrimination	No	No	No	Yes	No	No	No	No	1	Some Information	35-49	seconedu	urban	paid	Male
master only (1)	0.947485	12	No	No	0	No Discrimination	No	No	No	Yes	No	No	No	No	1	Some Information	25-34	primaryedu	rural	paid	Male
master only (1)	1.20366	6	No	No	0	No Discrimination	No	No	No	Yes	Yes	No	No	No	2	Some Information	35-49	seconedu	rural	paid	Male
master only (1)	1.40892	22	No	No	0	No Discrimination	No	No	No	Yes	Yes	No	No	No	2	Some Information	25-34	seconedu	urban	paid	Male
master only (1)	1.61577	22	No	No	0	No Discrimination	No	No	Yes	Yes	No	No	No	No	2	Some Information	35-49	primaryedu	urban	paid	Male
master only (1)	1.14131	35	No	No	0	No Discrimination	No	No	No	Yes	No	No	No	Yes	2	Some Information	35-49	highedu	rural	paid	Male
master only (1)	0.749929	5	No	No	0	No Discrimination	No	No	Yes	Yes	Yes	No	No	No	3	Some Information	35-49	seconedu	urban	paid	Male
master only (1)	0.308639	54	No	No	0	No Discrimination	No	No	Yes	Yes	No	No	No	No	2	Some Information	35-49	seconedu	urban	paid	Male
master only (1)	0.095412	58	No	No	0	No Discrimination	No	No	No	Yes	Yes	No	No	Yes	3	Some Information	25-34	seconedu	urban	paid	Male
master only (1)	0.292579	50	No	No	0	No Discrimination	No	No	No	Yes	No	No	No	No	1	Some Information	35-49	seconedu	urban	paid	Male
master only (1)	0.325321	13	No	No	0	No Discrimination	No	No	No	Yes	No	No	No	No	1	Some Information	35-49	seconedu	urban	paid	Male
master only (1)	0.411648	57	No	No	0	No Discrimination	No	No	No	No	No	No	No	No	0	No Information	35-49	primaryedu	rural	paid	Male
master only (1)	1.41293	22	No	No	0	No Discrimination	No	No	No	Yes	No	No	No	No	1	Some Information	35-49	seconedu	urban	paid	Male
master only (1)	1.50829	24	No	No	0	No Discrimination	No	No	No	Yes	No	No	No	No	1	Some Information	35-49	primaryedu	urban	paid	Male
master only (1)	1.90968	22	No	No	0	No Discrimination	Yes	No	No	Yes	No	No	No	No	2	Some Information	25-34	seconedu	urban	paid	Male
master only (1)	0.333981	50	No	No	0	No Discrimination	No	No	No	Yes	No	No	No	No	1	Some Information	35-49	seconedu	urban	paid	Male
master only (1)	0.594991	51	No	No	0	No Discrimination	No	No	No	Yes	No	No	No	No	1	Some Information	35-49	seconedu	rural	paid	Male
master only (1)	0.467135	51	No	No	0	No Discrimination	No	No	No	No	No	No	No	No	0	No Information	35-49	primaryedu	rural	paid	Male
master only (1)	0.185116	63	No	No	0	No Discrimination	No	No	No	Yes	No	No	No	No	1	Some Information	50-54	highedu	rural	paid	Male
master only (1)	0.263294	19	No	No	0	No Discrimination	No	No	No	Yes	No	No	No	No	1	Some Information	25-34	seconedu	urban	paid	Male
master only (1)	0.58756	5	No	No	0	No Discrimination	Yes	No	Yes	Yes	No	No	No	No	3	Some Information	35-49	seconedu	urban	paid	Male
master only (1)	0.598592	45	No	No	0	No Discrimination	Yes	No	No	Yes	Yes	No	No	No	3	Some Information	25-34	highedu	rural	paid	Male
master only (1)	0.623125	20	No	No	0	No Discrimination	No	No	No	No	No	No	No	No	0	No Information	50-54	primaryedu	rural	paid	Male
master only (1)	0.787356	3	No	No	0	No Discrimination	Yes	Yes	No	Yes	No	No	No	Yes	4	More Information	15-24	highedu	urban	paid	Male
master only (1)	0.815892	66	No	No	0	No Discrimination	Yes	Yes	Yes	Yes	No	No	No	Yes	5	More Information	35-49	highedu	urban	paid	Male
master only (1)	0.840746	3	No	No	0	No Discrimination	No	No	Yes	Yes	No	No	No	No	2	Some Information	35-49	seconedu	urban	paid	Male
master only (1)	2.16036	29	No	No	0	No Discrimination	No	No	No	No	No	No	No	No	0	No Information	35-49	seconedu	rural	paid	Male
master only (1)	2.85527	23	No	No	0	No Discrimination	No	No	No	Yes	No	No	No	No	1	Some Information	15-24	primaryedu	rural	paid	Male
master only (1)	0.261501	61	No	No	0	No Discrimination	Yes	No	No	Yes	No	No	No	No	2	Some Information	25-34	highedu	rural	paid	Male
master only (1)	0.333981	50	No	No	0	No Discrimination	No	Yes	No	Yes	No	No	No	No	2	Some Information	25-34	seconedu	urban	paid	Male
master only (1)	0.968225	15	No	No	0	No Discrimination	No	No	No	Yes	No	No	No	No	1	Some Information	50-54	primaryedu	urban	paid	Male
master only (1)	1.13089	10	No	No	0	No Discrimination	No	No	No	Yes	No	No	No	No	1	Some Information	35-49	seconedu	rural	paid	Male
master only (1)	1.14786	16	No	No	0	No Discrimination	No	No	No	Yes	No	No	No	No	1	Some Information	15-24	seconedu	rural	no paid	Male
master only (1)	0.243679	50	No	No	0	No Discrimination	No	No	No	No	No	No	No	No	0	No Information	50-54	primaryedu	urban	paid	Male
master only (1)	0.344269	19	No	No	0	No Discrimination	No	Yes	No	Yes	No	No	No	No	2	Some Information	35-49	seconedu	urban	paid	Male
master only (1)	0.439245	50	No	No	0	No Discrimination	No	No	No	Yes	No	No	No	No	1	Some Information	25-34	primaryedu	urban	paid	Male
master only (1)	0.467135	51	No	No	0	No Discrimination	No	No	No	Yes	No	No	No	No	1	Some Information	25-34	primaryedu	rural	paid	Male
master only (1)	0.518053	51	No	No	0	No Discrimination	No	No	No	No	No	No	No	No	0	No Information	15-24	primaryedu	rural	paid	Male
master only (1)	0.518053	51	No	No	0	No Discrimination	No	No	No	Yes	Yes	No	No	No	2	Some Information	25-34	primaryedu	rural	paid	Male
master only (1)	0.518053	51	No	No	0	No Discrimination	No	No	No	Yes	Yes	No	No	No	2	Some Information	50-54	seconedu	rural	paid	Male
master only (1)	0.320995	37	No	No	0	No Discrimination	No	No	No	No	Yes	No	No	No	1	Some Information	50-54	primaryedu	rural	paid	Male
master only (1)	0.387629	37	No	No	0	No Discrimination	No	Yes	No	No	Yes	No	No	No	2	Some Information	35-49	primaryedu	rural	paid	Male
master only (1)	0.841173	3	No	No	0	No Discrimination	No	No	Yes	Yes	No	No	No	No	2	Some Information	25-34	highedu	urban	paid	Male
master only (1)	1.00802	10	No	No	0	No Discrimination	No	No	Yes	Yes	No	No	No	No	2	Some Information	35-49	seconedu	rural	paid	Male
master only (1)	1.41818	16	No	No	0	No Discrimination	No	No	No	No	No	Yes	No	No	1	Some Information	25-34	seconedu	rural	paid	Male
master only (1)	0.820121	3	No	No	0	No Discrimination	No	No	No	Yes	No	No	No	No	1	Some Information	35-49	seconedu	urban	paid	Male
master only (1)	0.868809	21	No	No	0	No Discrimination	Yes	No	Yes	Yes	No	No	No	No	3	Some Information	25-34	seconedu	urban	paid	Male
master only (1)	1.76348	28	No	No	0	No Discrimination	No	No	No	Yes	No	No	No	No	1	Some Information	35-49	primaryedu	urban	paid	Male
master only (1)	0.357713	55	No	No	0	No Discrimination	No	No	No	Yes	No	No	No	No	1	Some Information	50-54	seconedu	rural	paid	Male
master only (1)	0.94397	11	No	No	0	No Discrimination	No	No	Yes	Yes	No	No	No	No	2	Some Information	35-49	seconedu	urban	paid	Male
master only (1)	0.416771	2	No	No	0	No Discrimination	No	No	No	Yes	No	No	No	No	1	Some Information	35-49	seconedu	rural	paid	Male
master only (1)	0.195052	55	No	No	0	No Discrimination	No	No	No	No	No	No	No	No	0	No Information	35-49	seconedu	rural	paid	Male
master only (1)	0.268454	50	No	No	0	No Discrimination	No	No	No	No	No	No	No	No	0	No Information	35-49	primaryedu	urban	paid	Male
master only (1)	0.723582	45	No	No	0	No Discrimination	No	No	No	No	No	No	No	No	0	No Information	35-49	primaryedu	rural	paid	Male
master only (1)	0.986703	8	No	No	0	No Discrimination	No	No	No	Yes	No	No	No	No	1	Some Information	25-34	seconedu	rural	paid	Male
master only (1)	0.297542	36	No	No	0	No Discrimination	No	No	No	Yes	No	No	No	No	1	Some Information	35-49	seconedu	urban	paid	Male
master only (1)	1.07384	45	No	No	0	No Discrimination	No	No	No	Yes	No	No	No	No	1	Some Information	35-49	seconedu	rural	paid	Male
master only (1)	1.10031	30	No	No	0	No Discrimination	Yes	No	No	No	No	No	No	No	1	Some Information	25-34	highedu	urban	paid	Male
master only (1)	1.56281	24	No	No	0	No Discrimination	Yes	Yes	Yes	Yes	No	No	No	No	4	More Information	35-49	highedu	urban	paid	Male
master only (1)	0.194204	62	No	No	0	No Discrimination	No	No	Yes	Yes	Yes	No	No	No	3	Some Information	35-49	seconedu	urban	paid	Male
master only (1)	0.219528	54	No	No	0	No Discrimination	No	No	Yes	Yes	No	No	No	No	2	Some Information	25-34	seconedu	urban	paid	Male
master only (1)	0.514407	36	No	No	0	No Discrimination	No	No	Yes	No	Yes	No	No	No	2	Some Information	50-54	highedu	urban	paid	Male
master only (1)	0.172527	17	No	No	0	No Discrimination	No	No	No	Yes	No	No	No	No	1	Some Information	35-49	highedu	urban	paid	Male
master only (1)	1.70535	28	No	No	0	No Discrimination	No	No	No	No	No	No	No	No	0	No Information	35-49	primaryedu	urban	paid	Male
master only (1)	0.126173	58	No	No	0	No Discrimination	No	No	No	No	No	No	No	Yes	1	Some Information	15-24	highedu	urban	no paid	Male
master only (1)	0.334697	17	No	No	0	No Discrimination	No	No	No	Yes	No	No	No	Yes	2	Some Information	25-34	seconedu	urban	paid	Male
master only (1)	1.4467	11	No	No	0	No Discrimination	No	No	No	Yes	No	No	No	No	1	Some Information	35-49	primaryedu	urban	paid	Male
master only (1)	0.343516	37	No	No	0	No Discrimination	No	No	No	No	Yes	Yes	No	No	2	Some Information	50-54	primaryedu	rural	paid	Male
master only (1)	0.208758	62	No	No	0	No Discrimination	No	No	No	Yes	No	No	No	No	1	Some Information	35-49	seconedu	urban	paid	Male
master only (1)	2.03266	25	No	No	0	No Discrimination	No	No	No	Yes	No	No	No	No	1	Some Information	35-49	primaryedu	rural	paid	Male
master only (1)	2.0624	25	No	No	0	No Discrimination	No	No	No	Yes	No	No	No	No	1	Some Information	35-49	primaryedu	rural	paid	Male
master only (1)	1.06368	3	No	No	0	No Discrimination	Yes	No	No	Yes	No	No	No	No	2	Some Information	25-34	seconedu	urban	paid	Male
master only (1)	1.21584	30	No	No	0	No Discrimination	No	No	No	Yes	No	No	No	No	1	Some Information	35-49	primaryedu	urban	paid	Male
master only (1)	1.56841	22	No	No	0	No Discrimination	No	No	No	Yes	No	No	No	No	1	Some Information	35-49	primaryedu	urban	paid	Male
master only (1)	0.387002	2	No	No	0	No Discrimination	No	No	No	Yes	Yes	No	No	No	2	Some Information	35-49	seconedu	rural	paid	Male
master only (1)	1.806	31	No	No	0	No Discrimination	No	No	No	No	No	No	No	No	0	No Information	35-49	primaryedu	rural	no paid	Male
master only (1)	1.0022	53	No	No	0	No Discrimination	Yes	No	No	No	Yes	No	No	No	2	Some Information	25-34	highedu	rural	paid	Male
master only (1)	0.139519	59	No	No	0	No Discrimination	No	Yes	No	Yes	No	No	No	No	2	Some Information	35-49	seconedu	rural	paid	Male
master only (1)	1.27609	24	No	No	0	No Discrimination	Yes	No	Yes	Yes	No	No	No	No	3	Some Information	35-49	seconedu	urban	paid	Male
master only (1)	1.28319	43	No	No	0	No Discrimination	No	No	No	Yes	No	No	No	Yes	2	Some Information	35-49	highedu	rural	paid	Male
master only (1)	1.01713	4	No	No	0	No Discrimination	No	No	No	Yes	No	No	No	No	1	Some Information	35-49	seconedu	rural	paid	Male
master only (1)	0.143273	46	No	No	0	No Discrimination	No	No	Yes	Yes	No	No	No	No	2	Some Information	35-49	seconedu	urban	paid	Male
master only (1)	1.12945	21	No	No	0	No Discrimination	No	No	No	Yes	No	No	No	No	1	Some Information	50-54	seconedu	urban	paid	Male
master only (1)	2.27777	29	No	No	0	No Discrimination	Yes	No	No	No	No	No	No	No	1	Some Information	25-34	highedu	rural	paid	Male
master only (1)	0.318443	36	No	No	0	No Discrimination	No	No	No	Yes	Yes	No	No	No	2	Some Information	50-54	seconedu	urban	paid	Male
master only (1)	0.384213	44	No	No	0	No Discrimination	Yes	Yes	Yes	Yes	No	No	No	No	4	More Information	35-49	highedu	urban	paid	Male
master only (1)	0.452971	11	No	No	0	No Discrimination	No	No	No	Yes	No	No	No	No	1	Some Information	25-34	seconedu	urban	paid	Male
master only (1)	0.530721	5	No	No	0	No Discrimination	Yes	Yes	Yes	Yes	No	No	No	No	4	More Information	25-34	highedu	urban	paid	Male
master only (1)	0.530721	5	No	No	0	No Discrimination	No	No	No	Yes	No	No	No	No	1	Some Information	25-34	primaryedu	urban	paid	Male
master only (1)	0.542197	5	No	No	0	No Discrimination	Yes	No	Yes	Yes	Yes	No	No	Yes	5	More Information	35-49	highedu	urban	paid	Male
master only (1)	0.800625	26	No	No	0	No Discrimination	Yes	No	No	Yes	No	No	No	Yes	3	Some Information	25-34	highedu	urban	paid	Male
master only (1)	0.813983	26	No	No	0	No Discrimination	No	No	No	Yes	Yes	Yes	No	Yes	4	More Information	25-34	highedu	urban	paid	Male
master only (1)	0.830405	41	No	No	0	No Discrimination	No	Yes	Yes	Yes	No	No	No	No	3	Some Information	35-49	seconedu	rural	paid	Male
master only (1)	0.892309	15	No	No	0	No Discrimination	No	No	No	No	No	No	No	Yes	1	Some Information	25-34	highedu	urban	paid	Male
master only (1)	0.919827	4	No	No	0	No Discrimination	No	No	No	Yes	No	No	No	No	1	Some Information	25-34	seconedu	rural	paid	Male
master only (1)	0.971273	26	No	No	0	No Discrimination	No	No	Yes	Yes	No	No	No	No	2	Some Information	50-54	seconedu	urban	paid	Male
master only (1)	1.04273	30	No	No	0	No Discrimination	Yes	No	No	Yes	No	No	No	No	2	Some Information	15-24	seconedu	urban	paid	Male
master only (1)	1.09757	26	No	No	0	No Discrimination	No	No	No	Yes	No	No	No	No	1	Some Information	35-49	seconedu	urban	paid	Male
master only (1)	1.12635	21	No	No	0	No Discrimination	No	No	No	Yes	Yes	No	No	No	2	Some Information	35-49	highedu	urban	paid	Male
master only (1)	1.21715	21	No	No	0	No Discrimination	Yes	No	No	Yes	No	No	No	No	2	Some Information	35-49	highedu	urban	paid	Male
master only (1)	1.58525	28	No	No	0	No Discrimination	Yes	No	Yes	Yes	Yes	No	No	No	4	More Information	25-34	highedu	urban	paid	Male
master only (1)	1.9519	28	No	No	0	No Discrimination	No	No	No	Yes	No	No	No	No	1	Some Information	35-49	seconedu	urban	paid	Male
master only (1)	2.03266	25	No	No	0	No Discrimination	Yes	No	Yes	Yes	No	No	No	No	3	Some Information	50-54	seconedu	rural	paid	Male
master only (1)	2.07214	24	No	No	0	No Discrimination	No	No	No	Yes	No	Yes	No	No	2	Some Information	35-49	seconedu	urban	paid	Male
master only (1)	3.57812	23	No	No	0	No Discrimination	No	No	No	Yes	No	No	No	No	1	Some Information	50-54	noedu	rural	paid	Male
master only (1)	1.93163	25	No	No	0	No Discrimination	No	No	No	Yes	Yes	No	No	No	2	Some Information	35-49	seconedu	rural	paid	Male
master only (1)	1.29262	30	No	No	0	No Discrimination	No	No	No	Yes	No	No	No	No	1	Some Information	25-34	seconedu	urban	paid	Male
master only (1)	1.17954	30	No	No	0	No Discrimination	No	No	No	Yes	No	No	No	No	1	Some Information	35-49	seconedu	urban	paid	Male
master only (1)	0.297542	36	No	No	0	No Discrimination	Yes	No	No	Yes	No	No	No	No	2	Some Information	35-49	seconedu	urban	paid	Male
master only (1)	0.363417	50	No	No	0	No Discrimination	Yes	No	No	Yes	Yes	No	No	No	3	Some Information	25-34	highedu	urban	paid	Male
master only (1)	0.386083	50	No	No	0	No Discrimination	Yes	No	No	Yes	No	No	No	No	2	Some Information	35-49	seconedu	urban	paid	Male
master only (1)	0.467135	51	No	No	0	No Discrimination	No	No	No	Yes	No	No	No	No	1	Some Information	35-49	seconedu	rural	paid	Male
master only (1)	0.539084	19	No	No	0	No Discrimination	No	No	No	Yes	No	No	No	No	1	Some Information	35-49	seconedu	urban	paid	Male
master only (1)	0.784364	26	No	No	0	No Discrimination	No	No	No	Yes	No	No	No	No	1	Some Information	35-49	seconedu	urban	paid	Male
master only (1)	1.48234	22	No	No	0	No Discrimination	No	No	No	Yes	No	No	No	No	1	Some Information	35-49	seconedu	urban	paid	Male
master only (1)	1.77683	24	No	No	0	No Discrimination	No	No	No	Yes	No	No	No	No	1	Some Information	35-49	primaryedu	urban	paid	Male
master only (1)	0.108352	47	No	No	0	No Discrimination	No	Yes	Yes	Yes	No	No	No	No	3	Some Information	35-49	seconedu	rural	paid	Male
master only (1)	1.47614	24	No	No	0	No Discrimination	No	Yes	Yes	No	No	No	No	No	2	Some Information	35-49	seconedu	urban	paid	Male
master only (1)	1.52646	24	No	No	0	No Discrimination	No	No	No	Yes	No	No	No	No	1	Some Information	35-49	primaryedu	urban	no paid	Male
master only (1)	2.2424	29	No	No	0	No Discrimination	Yes	Yes	No	No	No	No	No	No	2	Some Information	25-34	seconedu	rural	paid	Male
master only (1)	0.246856	61	No	No	0	No Discrimination	No	No	Yes	Yes	No	No	No	No	2	Some Information	35-49	seconedu	rural	paid	Male
master only (1)	0.631856	30	No	No	0	No Discrimination	No	No	No	Yes	No	No	No	No	1	Some Information	35-49	primaryedu	urban	paid	Male
master only (1)	1.35406	22	No	No	0	No Discrimination	No	No	No	Yes	No	No	No	No	1	Some Information	35-49	seconedu	urban	paid	Male
master only (1)	1.84027	22	No	No	0	No Discrimination	No	Yes	No	Yes	No	No	No	No	2	Some Information	35-49	primaryedu	urban	paid	Male
master only (1)	0.116485	65	No	No	0	No Discrimination	No	No	No	Yes	Yes	No	No	Yes	3	Some Information	25-34	seconedu	rural	paid	Male
master only (1)	0.286245	65	No	No	0	No Discrimination	No	No	No	Yes	Yes	No	No	No	2	Some Information	25-34	seconedu	rural	paid	Male
master only (1)	0.800625	26	No	No	0	No Discrimination	Yes	No	No	Yes	No	No	No	Yes	3	Some Information	25-34	seconedu	urban	no paid	Male
master only (1)	0.800625	26	No	No	0	No Discrimination	Yes	No	No	Yes	No	No	No	No	2	Some Information	25-34	seconedu	urban	paid	Male
master only (1)	0.800625	26	No	No	0	No Discrimination	No	No	No	Yes	No	No	No	No	1	Some Information	50-54	seconedu	urban	no paid	Male
master only (1)	0.800625	26	No	No	0	No Discrimination	No	No	No	Yes	No	No	No	No	1	Some Information	50-54	seconedu	urban	no paid	Male
master only (1)	0.806166	26	No	No	0	No Discrimination	Yes	No	No	Yes	No	Yes	No	No	3	Some Information	35-49	seconedu	urban	paid	Male
master only (1)	0.898169	26	No	No	0	No Discrimination	Yes	No	No	Yes	Yes	Yes	No	No	4	More Information	50-54	seconedu	urban	paid	Male
master only (1)	0.898169	26	No	No	0	No Discrimination	Yes	No	Yes	Yes	No	Yes	No	Yes	5	More Information	35-49	highedu	urban	paid	Male
master only (1)	0.898169	26	No	No	0	No Discrimination	No	No	No	Yes	No	Yes	No	No	2	Some Information	35-49	seconedu	urban	paid	Male
master only (1)	0.898169	26	No	No	0	No Discrimination	No	No	No	Yes	No	Yes	No	No	2	Some Information	50-54	highedu	urban	no paid	Male
master only (1)	0.92025	30	No	No	0	No Discrimination	Yes	No	No	Yes	No	No	No	No	2	Some Information	35-49	seconedu	urban	paid	Male
master only (1)	0.971273	26	No	No	0	No Discrimination	Yes	No	No	Yes	No	No	No	No	2	Some Information	35-49	seconedu	urban	paid	Male
master only (1)	0.971273	26	No	No	0	No Discrimination	No	No	No	No	No	Yes	No	No	1	Some Information	35-49	seconedu	urban	paid	Male
master only (1)	0.971273	26	No	No	0	No Discrimination	Yes	No	Yes	Yes	No	No	No	Yes	4	More Information	35-49	highedu	urban	no paid	Male
master only (1)	0.971273	26	No	No	0	No Discrimination	No	No	Yes	Yes	Yes	No	No	No	3	Some Information	35-49	seconedu	urban	paid	Male
master only (1)	0.971273	26	No	No	0	No Discrimination	No	No	No	Yes	No	No	No	No	1	Some Information	50-54	seconedu	urban	paid	Male
master only (1)	1.16828	26	No	No	0	No Discrimination	No	No	No	Yes	No	No	No	Yes	2	Some Information	35-49	seconedu	urban	paid	Male
master only (1)	1.56301	30	No	No	0	No Discrimination	No	No	No	Yes	No	No	No	No	1	Some Information	25-34	primaryedu	urban	paid	Male
master only (1)	0.667949	3	No	No	0	No Discrimination	No	No	Yes	Yes	No	No	No	No	2	Some Information	25-34	seconedu	urban	paid	Male
master only (1)	1.95914	25	No	No	0	No Discrimination	No	No	No	Yes	No	No	No	No	1	Some Information	35-49	primaryedu	rural	paid	Male
master only (1)	1.21237	22	No	No	0	No Discrimination	No	No	No	Yes	Yes	No	No	No	2	Some Information	35-49	primaryedu	urban	paid	Male
master only (1)	0.813625	3	No	No	0	No Discrimination	No	No	Yes	Yes	No	No	No	No	2	Some Information	25-34	seconedu	urban	paid	Male
master only (1)	0.509097	14	No	No	0	No Discrimination	No	No	No	Yes	No	No	No	No	1	Some Information	35-49	seconedu	rural	paid	Male
master only (1)	1.52885	22	No	No	0	No Discrimination	No	No	No	No	No	No	No	No	0	No Information	35-49	primaryedu	urban	paid	Male
master only (1)	1.64389	28	No	No	0	No Discrimination	Yes	No	No	Yes	No	No	No	No	2	Some Information	25-34	seconedu	urban	paid	Male
master only (1)	1.70535	28	No	No	0	No Discrimination	No	No	No	No	No	No	No	No	0	No Information	35-49	seconedu	urban	paid	Male
master only (1)	2.14294	29	No	No	0	No Discrimination	No	No	No	Yes	No	No	No	No	1	Some Information	25-34	primaryedu	rural	paid	Male
master only (1)	2.20274	28	No	No	0	No Discrimination	No	No	No	No	No	No	No	Yes	1	Some Information	25-34	seconedu	urban	no paid	Male
master only (1)	0.433713	14	No	No	0	No Discrimination	No	No	No	Yes	No	No	No	No	1	Some Information	25-34	seconedu	rural	paid	Male
master only (1)	2.04421	29	No	No	0	No Discrimination	No	No	No	Yes	No	No	No	No	1	Some Information	25-34	primaryedu	rural	paid	Male
master only (1)	0.880539	67	No	No	0	No Discrimination	No	No	No	Yes	Yes	No	No	No	2	Some Information	25-34	primaryedu	rural	no paid	Male
master only (1)	1.29752	3	No	No	0	No Discrimination	No	No	Yes	Yes	No	No	No	No	2	Some Information	35-49	seconedu	urban	paid	Male
master only (1)	1.70535	28	No	No	0	No Discrimination	No	No	Yes	No	No	No	No	No	1	Some Information	35-49	highedu	urban	paid	Male
master only (1)	0.292579	50	No	No	0	No Discrimination	No	No	No	Yes	No	No	No	No	1	Some Information	35-49	seconedu	urban	paid	Male
master only (1)	0.312819	50	No	No	0	No Discrimination	No	No	No	Yes	No	No	No	No	1	Some Information	50-54	seconedu	urban	paid	Male
master only (1)	0.363417	50	No	No	0	No Discrimination	Yes	No	No	Yes	Yes	No	No	No	3	Some Information	50-54	highedu	urban	paid	Male
master only (1)	1.70535	28	No	No	0	No Discrimination	No	No	No	No	Yes	No	No	No	1	Some Information	25-34	seconedu	urban	paid	Male
master only (1)	0.312819	50	No	No	0	No Discrimination	No	No	No	Yes	No	No	No	No	1	Some Information	35-49	seconedu	urban	paid	Male
master only (1)	0.363417	50	No	No	0	No Discrimination	Yes	No	Yes	Yes	Yes	No	No	No	4	More Information	35-49	highedu	urban	paid	Male
master only (1)	0.363417	50	No	No	0	No Discrimination	Yes	No	No	Yes	No	No	No	No	2	Some Information	35-49	highedu	urban	paid	Male
master only (1)	0.429391	51	No	No	0	No Discrimination	No	No	Yes	Yes	No	No	No	No	2	Some Information	35-49	seconedu	rural	paid	Male
master only (1)	0.871995	51	No	No	0	No Discrimination	Yes	No	No	Yes	Yes	No	No	No	3	Some Information	25-34	highedu	rural	paid	Male
master only (1)	0.871995	51	No	No	0	No Discrimination	No	No	No	Yes	Yes	No	No	No	2	Some Information	25-34	seconedu	rural	paid	Male
master only (1)	1.42109	11	No	No	0	No Discrimination	No	No	No	Yes	No	No	No	No	1	Some Information	50-54	primaryedu	urban	paid	Male
master only (1)	1.57745	28	No	No	0	No Discrimination	Yes	No	No	No	No	No	No	No	1	Some Information	25-34	seconedu	urban	paid	Male
master only (1)	1.70535	28	No	No	0	No Discrimination	No	No	No	No	No	No	No	No	0	No Information	15-24	seconedu	urban	paid	Male
master only (1)	0.280774	37	No	No	0	No Discrimination	No	No	No	Yes	No	No	No	No	1	Some Information	25-34	seconedu	rural	paid	Male
master only (1)	0.280774	37	No	No	0	No Discrimination	No	No	No	Yes	No	No	No	No	1	Some Information	25-34	seconedu	rural	paid	Male
master only (1)	0.280774	37	No	No	0	No Discrimination	No	No	No	Yes	No	No	No	No	1	Some Information	25-34	seconedu	rural	paid	Male
master only (1)	0.31993	37	No	No	0	No Discrimination	Yes	No	No	Yes	No	No	No	No	2	Some Information	25-34	highedu	rural	paid	Male
master only (1)	0.320995	37	No	No	0	No Discrimination	No	No	No	No	Yes	No	No	No	1	Some Information	50-54	seconedu	rural	paid	Male
master only (1)	0.442612	51	No	No	0	No Discrimination	No	No	No	Yes	No	No	No	No	1	Some Information	35-49	noedu	rural	paid	Male
master only (1)	0.464447	37	No	No	0	No Discrimination	No	Yes	No	No	Yes	No	No	No	2	Some Information	25-34	seconedu	rural	paid	Male
master only (1)	0.464447	37	No	No	0	No Discrimination	No	No	No	No	Yes	No	No	No	1	Some Information	25-34	primaryedu	rural	paid	Male
master only (1)	0.720866	52	No	No	0	No Discrimination	No	No	No	No	No	No	No	No	0	No Information	35-49	seconedu	urban	paid	Male
master only (1)	0.139519	59	No	No	0	No Discrimination	No	No	No	Yes	No	No	No	No	1	Some Information	35-49	seconedu	rural	paid	Male
master only (1)	0.340639	37	No	No	0	No Discrimination	No	No	No	No	Yes	No	No	No	1	Some Information	15-24	seconedu	rural	paid	Male
master only (1)	0.905287	41	No	No	0	No Discrimination	No	No	No	Yes	No	No	No	No	1	Some Information	35-49	seconedu	rural	paid	Male
master only (1)	2.10567	29	No	No	0	No Discrimination	No	No	No	No	No	No	No	No	0	No Information	35-49	primaryedu	rural	paid	Male
master only (1)	1.69034	22	No	No	0	No Discrimination	No	No	No	No	No	No	No	No	0	No Information	15-24	seconedu	urban	paid	Male
master only (1)	1.8985	29	No	No	0	No Discrimination	No	No	No	No	No	No	No	No	0	No Information	35-49	primaryedu	rural	paid	Male
master only (1)	0.263634	36	No	No	0	No Discrimination	No	Yes	No	Yes	Yes	No	No	No	3	Some Information	25-34	primaryedu	urban	paid	Male
master only (1)	0.515534	67	No	No	0	No Discrimination	No	No	Yes	Yes	No	No	No	No	2	Some Information	35-49	seconedu	rural	no paid	Male
master only (1)	1.15213	6	No	No	0	No Discrimination	No	No	No	No	No	No	No	No	0	No Information	50-54	primaryedu	rural	paid	Male
master only (1)	1.18239	4	No	No	0	No Discrimination	No	No	No	No	No	No	No	No	0	No Information	15-24	primaryedu	rural	paid	Male
master only (1)	1.34993	24	No	No	0	No Discrimination	Yes	No	No	No	No	No	No	No	1	Some Information	35-49	highedu	urban	paid	Male
master only (1)	1.49739	24	No	No	0	No Discrimination	No	No	No	No	No	No	No	No	0	No Information	35-49	seconedu	urban	paid	Male
master only (1)	0.063091	47	No	Yes	1	Yes	No	No	No	Yes	No	No	No	No	1	Some Information	35-49	primaryedu	rural	paid	Male
master only (1)	0.100892	47	No	Yes	1	Yes	No	No	No	Yes	Yes	No	No	No	2	Some Information	35-49	highedu	rural	paid	Male
master only (1)	0.1279	58	No	Yes	1	Yes	No	No	No	Yes	No	Yes	No	No	2	Some Information	50-54	primaryedu	urban	paid	Male
master only (1)	0.147673	54	No	Yes	1	Yes	No	No	No	No	No	No	No	No	0	No Information	15-24	primaryedu	urban	paid	Male
master only (1)	0.150441	54	No	Yes	1	Yes	Yes	No	Yes	Yes	Yes	No	No	Yes	5	More Information	25-34	noedu	urban	paid	Male
master only (1)	0.157656	59	No	Yes	1	Yes	No	No	No	Yes	No	No	No	No	1	Some Information	35-49	highedu	rural	paid	Male
master only (1)	0.185143	62	No	Yes	1	Yes	No	No	No	No	No	No	No	No	0	No Information	50-54	primaryedu	urban	no paid	Male
master only (1)	0.188987	63	No	Yes	1	Yes	No	No	No	No	No	No	No	No	0	No Information	25-34	seconedu	rural	paid	Male
master only (1)	0.210571	36	No	Yes	1	Yes	No	Yes	Yes	Yes	Yes	Yes	No	Yes	6	More Information	35-49	seconedu	urban	paid	Male
master only (1)	0.222087	65	No	Yes	1	Yes	No	No	No	No	Yes	No	No	No	1	Some Information	50-54	primaryedu	rural	no paid	Male
master only (1)	0.238432	63	No	Yes	1	Yes	No	No	No	No	No	No	No	No	0	No Information	35-49	primaryedu	rural	paid	Male
master only (1)	0.238432	63	No	Yes	1	Yes	No	No	No	Yes	Yes	No	No	No	2	Some Information	25-34	highedu	rural	paid	Male
master only (1)	0.260383	63	No	Yes	1	Yes	No	No	No	Yes	No	No	No	No	1	Some Information	35-49	seconedu	rural	paid	Male
master only (1)	0.260383	63	No	Yes	1	Yes	No	No	No	Yes	No	No	No	No	1	Some Information	35-49	noedu	rural	paid	Male
master only (1)	0.291442	50	No	Yes	1	Yes	No	No	No	Yes	Yes	No	No	No	2	Some Information	35-49	seconedu	urban	paid	Male
master only (1)	0.292493	55	No	Yes	1	Yes	No	No	No	No	No	No	No	No	0	No Information	15-24	primaryedu	rural	paid	Male
master only (1)	0.347127	44	No	Yes	1	Yes	No	No	Yes	Yes	No	No	No	No	2	Some Information	35-49	seconedu	urban	paid	Male
master only (1)	0.351461	37	No	Yes	1	Yes	No	Yes	Yes	No	No	No	No	No	2	Some Information	25-34	seconedu	rural	paid	Male
master only (1)	0.356925	44	No	Yes	1	Yes	No	No	Yes	Yes	No	No	No	No	2	Some Information	25-34	seconedu	urban	paid	Male
master only (1)	0.385374	37	No	Yes	1	Yes	No	Yes	Yes	Yes	No	No	No	No	3	Some Information	35-49	seconedu	rural	paid	Male
master only (1)	0.493516	37	No	Yes	1	Yes	No	No	No	Yes	No	No	No	No	1	Some Information	25-34	primaryedu	rural	paid	Male
master only (1)	0.493516	37	No	Yes	1	Yes	Yes	No	No	No	No	No	No	No	1	Some Information	35-49	highedu	rural	paid	Male
master only (1)	0.825802	43	No	Yes	1	Yes	No	No	No	Yes	No	No	No	No	1	Some Information	35-49	seconedu	rural	paid	Male
master only (1)	0.891901	26	No	Yes	1	Yes	No	No	No	No	No	No	No	No	0	No Information	35-49	primaryedu	urban	paid	Male
master only (1)	1.03634	43	No	Yes	1	Yes	No	No	No	Yes	No	No	No	No	1	Some Information	35-49	seconedu	rural	paid	Male
master only (1)	1.17925	67	No	Yes	1	Yes	No	No	No	No	No	No	No	No	0	No Information	15-24	primaryedu	rural	paid	Male
master only (1)	1.22236	31	No	Yes	1	Yes	No	No	No	No	No	No	No	No	0	No Information	35-49	seconedu	rural	paid	Male
master only (1)	1.39445	22	No	Yes	1	Yes	No	Yes	Yes	Yes	No	No	No	No	3	Some Information	35-49	highedu	urban	paid	Male
master only (1)	1.55983	24	No	Yes	1	Yes	No	No	No	Yes	No	No	No	No	1	Some Information	35-49	primaryedu	urban	paid	Male
master only (1)	1.61946	31	No	Yes	1	Yes	No	No	No	No	Yes	No	No	No	1	Some Information	25-34	seconedu	rural	paid	Male
master only (1)	2.05125	29	No	Yes	1	Yes	No	No	No	Yes	No	No	No	No	1	Some Information	35-49	primaryedu	rural	paid	Male
master only (1)	2.29709	29	No	Yes	1	Yes	No	No	No	Yes	Yes	No	No	No	2	Some Information	35-49	seconedu	rural	paid	Male
master only (1)	0.11195	58	No	Yes	1	Yes	No	No	No	Yes	No	No	No	No	1	Some Information	25-34	seconedu	urban	paid	Male
master only (1)	0.238432	63	No	Yes	1	Yes	No	No	No	Yes	No	No	No	No	1	Some Information	35-49	seconedu	rural	paid	Male
master only (1)	0.326996	36	No	Yes	1	Yes	Yes	No	No	No	No	No	No	No	1	Some Information	25-34	seconedu	urban	paid	Male
master only (1)	0.359143	37	No	Yes	1	Yes	No	No	No	Yes	Yes	No	No	No	2	Some Information	25-34	seconedu	rural	paid	Male
master only (1)	0.385374	37	No	Yes	1	Yes	No	Yes	No	Yes	No	No	No	No	2	Some Information	25-34	seconedu	rural	paid	Male
master only (1)	0.387369	37	No	Yes	1	Yes	No	No	No	No	Yes	Yes	No	No	2	Some Information	50-54	seconedu	rural	paid	Male
master only (1)	0.422176	37	No	Yes	1	Yes	No	No	No	No	No	No	No	No	0	No Information	35-49	primaryedu	rural	no paid	Male
master only (1)	0.975196	43	No	Yes	1	Yes	No	No	No	Yes	No	No	No	No	1	Some Information	35-49	seconedu	rural	paid	Male
master only (1)	0.998567	30	No	Yes	1	Yes	No	Yes	No	Yes	No	No	No	No	2	Some Information	35-49	primaryedu	urban	no paid	Male
master only (1)	1.17271	22	No	Yes	1	Yes	Yes	Yes	No	Yes	No	No	No	No	3	Some Information	25-34	seconedu	urban	paid	Male
master only (1)	1.43674	24	No	Yes	1	Yes	No	Yes	No	Yes	No	No	No	No	2	Some Information	35-49	primaryedu	urban	paid	Male
master only (1)	1.5475	22	No	Yes	1	Yes	Yes	Yes	No	Yes	No	No	No	No	3	Some Information	35-49	highedu	urban	paid	Male
master only (1)	1.56238	22	No	Yes	1	Yes	No	No	No	Yes	No	No	No	No	1	Some Information	25-34	primaryedu	urban	paid	Male
master only (1)	1.57699	28	No	Yes	1	Yes	No	No	No	No	No	No	No	No	0	No Information	35-49	primaryedu	urban	no paid	Male
master only (1)	0.264394	54	No	Yes	1	Yes	No	No	No	Yes	No	No	No	No	1	Some Information	35-49	primaryedu	urban	paid	Male
master only (1)	0.338192	51	No	Yes	1	Yes	No	No	No	Yes	No	No	No	No	1	Some Information	35-49	seconedu	rural	paid	Male
master only (1)	0.094809	58	No	Yes	1	Yes	No	No	No	Yes	No	No	No	No	1	Some Information	25-34	primaryedu	urban	paid	Male
master only (1)	0.100892	47	No	Yes	1	Yes	No	No	No	Yes	No	No	No	No	1	Some Information	35-49	highedu	rural	paid	Male
master only (1)	0.113585	63	No	Yes	1	Yes	No	Yes	Yes	Yes	No	No	No	No	3	Some Information	25-34	seconedu	rural	paid	Male
master only (1)	0.198597	63	No	Yes	1	Yes	No	No	No	Yes	No	No	No	No	1	Some Information	35-49	highedu	rural	paid	Male
master only (1)	0.214131	63	No	Yes	1	Yes	No	No	No	Yes	Yes	No	No	No	2	Some Information	25-34	highedu	rural	paid	Male
master only (1)	0.222087	65	No	Yes	1	Yes	No	No	No	No	Yes	No	No	No	1	Some Information	35-49	seconedu	rural	no paid	Male
master only (1)	0.239058	63	No	Yes	1	Yes	No	No	Yes	Yes	No	No	No	No	2	Some Information	50-54	highedu	rural	paid	Male
master only (1)	0.264106	55	No	Yes	1	Yes	No	No	Yes	Yes	No	No	No	No	2	Some Information	35-49	seconedu	rural	paid	Male
master only (1)	0.281005	20	No	Yes	1	Yes	No	No	No	Yes	No	No	No	No	1	Some Information	50-54	primaryedu	rural	paid	Male
master only (1)	0.310675	57	No	Yes	1	Yes	No	Yes	Yes	Yes	No	No	No	No	3	Some Information	35-49	seconedu	rural	paid	Male
master only (1)	0.325427	37	No	Yes	1	Yes	Yes	No	Yes	Yes	Yes	No	No	No	4	More Information	35-49	highedu	rural	paid	Male
master only (1)	0.325427	37	No	Yes	1	Yes	No	No	No	No	No	Yes	No	No	1	Some Information	35-49	seconedu	rural	no paid	Male
master only (1)	0.357713	55	No	Yes	1	Yes	No	No	No	Yes	No	Yes	No	No	2	Some Information	35-49	primaryedu	rural	paid	Male
master only (1)	0.407565	51	No	Yes	1	Yes	No	No	Yes	Yes	No	No	No	No	2	Some Information	50-54	highedu	rural	paid	Male
master only (1)	1.07377	15	No	Yes	1	Yes	Yes	No	No	No	No	No	No	No	1	Some Information	25-34	seconedu	urban	paid	Male
master only (1)	1.28092	4	No	Yes	1	Yes	No	No	No	No	No	No	No	No	0	No Information	35-49	seconedu	rural	paid	Male
master only (1)	1.39414	22	No	Yes	1	Yes	No	No	No	No	No	No	No	No	0	No Information	50-54	primaryedu	urban	paid	Male
master only (1)	1.41733	22	No	Yes	1	Yes	No	No	No	Yes	No	No	No	No	1	Some Information	25-34	seconedu	urban	paid	Male
master only (1)	1.80157	24	No	Yes	1	Yes	No	No	No	Yes	No	No	No	No	1	Some Information	35-49	primaryedu	urban	paid	Male
master only (1)	2.10637	25	No	Yes	1	Yes	No	No	No	Yes	No	No	No	No	1	Some Information	35-49	primaryedu	rural	paid	Male
master only (1)	0.08223	60	No	Yes	1	Yes	No	No	Yes	Yes	No	No	No	No	2	Some Information	35-49	seconedu	urban	paid	Male
master only (1)	0.096792	60	No	Yes	1	Yes	No	No	No	No	No	No	No	No	0	No Information	25-34	seconedu	urban	paid	Male
master only (1)	0.096792	60	No	Yes	1	Yes	No	No	No	Yes	No	No	No	No	1	Some Information	35-49	seconedu	urban	paid	Male
master only (1)	0.123493	60	No	Yes	1	Yes	No	No	No	Yes	No	No	No	No	1	Some Information	25-34	seconedu	urban	paid	Male
master only (1)	0.123493	60	No	Yes	1	Yes	No	No	No	Yes	Yes	No	No	No	2	Some Information	35-49	seconedu	urban	paid	Male
master only (1)	0.134898	60	No	Yes	1	Yes	No	No	No	Yes	No	No	No	No	1	Some Information	35-49	seconedu	urban	paid	Male
master only (1)	0.134898	60	No	Yes	1	Yes	No	No	Yes	Yes	No	No	No	No	2	Some Information	25-34	seconedu	urban	paid	Male
master only (1)	0.138437	59	No	Yes	1	Yes	No	No	No	No	No	Yes	No	No	1	Some Information	35-49	seconedu	rural	paid	Male
master only (1)	0.150441	54	No	Yes	1	Yes	Yes	Yes	Yes	Yes	Yes	Yes	No	Yes	7	More Information	50-54	highedu	urban	paid	Male
master only (1)	0.15697	61	No	Yes	1	Yes	No	No	No	Yes	No	No	No	No	1	Some Information	25-34	highedu	rural	paid	Male
master only (1)	0.167322	61	No	Yes	1	Yes	No	No	No	Yes	No	No	No	No	1	Some Information	50-54	seconedu	rural	paid	Male
master only (1)	0.168318	60	No	Yes	1	Yes	Yes	No	No	Yes	No	No	No	No	2	Some Information	35-49	highedu	urban	paid	Male
master only (1)	0.169723	61	No	Yes	1	Yes	No	No	No	No	Yes	No	No	No	1	Some Information	35-49	primaryedu	rural	no paid	Male
master only (1)	0.173249	59	No	Yes	1	Yes	No	No	No	Yes	Yes	No	No	No	2	Some Information	25-34	primaryedu	rural	paid	Male
master only (1)	0.198597	63	No	Yes	1	Yes	No	No	No	Yes	No	No	No	No	1	Some Information	15-24	highedu	rural	paid	Male
master only (1)	0.245907	19	No	Yes	1	Yes	Yes	Yes	Yes	Yes	No	Yes	No	No	5	More Information	35-49	highedu	urban	paid	Male
master only (1)	0.32807	36	No	Yes	1	Yes	No	Yes	No	No	No	No	No	No	1	Some Information	35-49	primaryedu	urban	paid	Male
master only (1)	0.347977	61	No	Yes	1	Yes	No	No	No	Yes	No	No	No	No	1	Some Information	50-54	seconedu	rural	paid	Male
master only (1)	0.347977	61	No	Yes	1	Yes	No	No	No	Yes	No	No	No	No	1	Some Information	35-49	highedu	rural	paid	Male
master only (1)	0.347977	61	No	Yes	1	Yes	No	No	No	Yes	No	No	No	No	1	Some Information	35-49	seconedu	rural	paid	Male
master only (1)	0.347977	61	No	Yes	1	Yes	No	No	No	Yes	No	No	No	No	1	Some Information	35-49	highedu	rural	paid	Male
master only (1)	0.348748	2	No	Yes	1	Yes	No	No	No	No	Yes	No	No	No	1	Some Information	25-34	seconedu	rural	paid	Male
master only (1)	0.371125	2	No	Yes	1	Yes	No	No	No	Yes	No	Yes	No	No	2	Some Information	35-49	seconedu	rural	paid	Male
master only (1)	0.376448	55	No	Yes	1	Yes	No	No	No	Yes	No	No	No	Yes	2	Some Information	25-34	highedu	rural	paid	Male
master only (1)	0.392941	55	No	Yes	1	Yes	No	No	No	Yes	No	No	No	No	1	Some Information	50-54	seconedu	rural	paid	Male
master only (1)	0.39579	37	No	Yes	1	Yes	No	No	No	No	Yes	No	No	No	1	Some Information	35-49	seconedu	rural	paid	Male
master only (1)	0.39579	37	No	Yes	1	Yes	No	No	Yes	No	Yes	No	No	No	2	Some Information	35-49	seconedu	rural	paid	Male
master only (1)	0.400453	57	No	Yes	1	Yes	Yes	Yes	No	Yes	Yes	Yes	No	Yes	6	More Information	35-49	highedu	rural	paid	Male
master only (1)	0.439284	51	No	Yes	1	Yes	No	No	No	Yes	No	No	No	No	1	Some Information	35-49	seconedu	rural	paid	Male
master only (1)	0.443812	13	No	Yes	1	Yes	No	No	No	Yes	No	No	No	No	1	Some Information	25-34	primaryedu	urban	paid	Male
master only (1)	0.451726	14	No	Yes	1	Yes	No	Yes	No	Yes	No	No	No	No	2	Some Information	35-49	seconedu	rural	paid	Male
master only (1)	0.457258	2	No	Yes	1	Yes	No	No	No	Yes	No	No	No	No	1	Some Information	35-49	primaryedu	rural	paid	Male
master only (1)	0.46286	14	No	Yes	1	Yes	No	No	No	Yes	No	No	No	No	1	Some Information	35-49	seconedu	rural	paid	Male
master only (1)	0.480079	37	No	Yes	1	Yes	No	No	No	Yes	No	No	No	No	1	Some Information	35-49	primaryedu	rural	paid	Male
master only (1)	0.57246	44	No	Yes	1	Yes	No	No	Yes	Yes	No	No	No	No	2	Some Information	25-34	seconedu	urban	paid	Male
master only (1)	0.787321	52	No	Yes	1	Yes	No	Yes	No	Yes	No	No	No	No	2	Some Information	50-54	seconedu	urban	paid	Male
master only (1)	0.810982	15	No	Yes	1	Yes	No	No	No	Yes	No	No	No	No	1	Some Information	50-54	seconedu	urban	paid	Male
master only (1)	0.908117	11	No	Yes	1	Yes	No	No	No	Yes	No	No	No	No	1	Some Information	35-49	seconedu	urban	paid	Male
master only (1)	1.03111	21	No	Yes	1	Yes	No	No	Yes	Yes	No	No	No	No	2	Some Information	35-49	seconedu	urban	paid	Male
master only (1)	1.06547	4	No	Yes	1	Yes	No	No	Yes	No	No	No	No	No	1	Some Information	25-34	seconedu	rural	paid	Male
master only (1)	1.23474	6	No	Yes	1	Yes	No	No	No	Yes	No	No	No	Yes	2	Some Information	35-49	highedu	rural	paid	Male
master only (1)	1.40892	22	No	Yes	1	Yes	No	No	No	Yes	No	No	No	No	1	Some Information	35-49	seconedu	urban	paid	Male
master only (1)	1.51109	22	No	Yes	1	Yes	No	Yes	No	Yes	No	No	No	No	2	Some Information	35-49	highedu	urban	paid	Male
master only (1)	1.60154	28	No	Yes	1	Yes	No	No	No	No	No	No	No	No	0	No Information	50-54	seconedu	urban	paid	Male
master only (1)	1.61679	22	No	Yes	1	Yes	No	No	No	Yes	Yes	No	No	No	2	Some Information	50-54	seconedu	urban	paid	Male
master only (1)	1.64357	24	No	Yes	1	Yes	Yes	No	No	Yes	No	No	No	No	2	Some Information	15-24	seconedu	urban	paid	Male
master only (1)	1.72721	28	No	Yes	1	Yes	No	No	Yes	Yes	No	No	No	No	2	Some Information	35-49	seconedu	urban	paid	Male
master only (1)	1.73607	28	No	Yes	1	Yes	No	Yes	Yes	Yes	No	No	No	No	3	Some Information	35-49	primaryedu	urban	paid	Male
master only (1)	1.78058	28	No	Yes	1	Yes	No	Yes	No	Yes	No	No	No	No	2	Some Information	35-49	primaryedu	urban	paid	Male
master only (1)	1.84902	24	No	Yes	1	Yes	No	Yes	No	Yes	No	No	No	No	2	Some Information	35-49	seconedu	urban	paid	Male
master only (1)	2.16036	29	No	Yes	1	Yes	No	No	No	Yes	No	No	No	No	1	Some Information	25-34	seconedu	rural	paid	Male
master only (1)	2.16036	29	No	Yes	1	Yes	No	No	No	Yes	Yes	No	No	No	2	Some Information	50-54	primaryedu	rural	paid	Male
master only (1)	2.58972	23	No	Yes	1	Yes	No	No	No	No	No	No	No	No	0	No Information	50-54	seconedu	rural	paid	Male
master only (1)	2.93589	23	No	Yes	1	Yes	No	No	No	Yes	No	No	No	No	1	Some Information	25-34	seconedu	rural	paid	Male
master only (1)	3.04463	23	No	Yes	1	Yes	No	No	No	Yes	No	No	No	No	1	Some Information	35-49	primaryedu	rural	paid	Male
master only (1)	1.07377	15	No	Yes	1	Yes	No	No	No	Yes	No	No	No	No	1	Some Information	50-54	seconedu	urban	paid	Male
master only (1)	1.25413	4	No	Yes	1	Yes	No	Yes	Yes	Yes	No	No	No	No	3	Some Information	35-49	primaryedu	rural	paid	Male
master only (1)	2.18897	25	No	Yes	1	Yes	No	No	No	Yes	No	No	No	No	1	Some Information	50-54	primaryedu	rural	paid	Male
master only (1)	0.337914	55	No	Yes	1	Yes	No	No	No	Yes	No	No	No	No	1	Some Information	35-49	seconedu	rural	paid	Male
master only (1)	0.476968	14	No	Yes	1	Yes	No	No	No	Yes	No	No	No	No	1	Some Information	35-49	seconedu	rural	paid	Male
master only (1)	0.48126	5	No	Yes	1	Yes	No	No	No	Yes	No	No	No	No	1	Some Information	35-49	primaryedu	urban	paid	Male
master only (1)	0.719013	42	No	Yes	1	Yes	No	No	No	Yes	No	No	No	No	1	Some Information	35-49	seconedu	urban	paid	Male
master only (1)	0.761837	42	No	Yes	1	Yes	No	No	No	Yes	No	No	No	No	1	Some Information	35-49	seconedu	urban	paid	Male
master only (1)	0.095412	58	No	Yes	1	Yes	No	No	No	Yes	No	No	No	No	1	Some Information	35-49	seconedu	urban	paid	Male
master only (1)	0.104654	58	No	Yes	1	Yes	Yes	No	No	Yes	No	No	No	No	2	Some Information	35-49	seconedu	urban	paid	Male
master only (1)	0.104654	58	No	Yes	1	Yes	No	No	Yes	Yes	No	No	No	No	2	Some Information	35-49	seconedu	urban	paid	Male
master only (1)	0.107467	59	No	Yes	1	Yes	No	No	No	Yes	No	No	No	No	1	Some Information	35-49	primaryedu	rural	no paid	Male
master only (1)	0.121956	58	No	Yes	1	Yes	No	No	No	Yes	No	Yes	No	No	2	Some Information	50-54	seconedu	urban	paid	Male
master only (1)	0.161319	59	No	Yes	1	Yes	No	Yes	Yes	Yes	No	No	No	No	3	Some Information	50-54	highedu	rural	paid	Male
master only (1)	0.1777	17	No	Yes	1	Yes	No	No	No	Yes	No	No	No	No	1	Some Information	35-49	primaryedu	urban	no paid	Male
master only (1)	0.219528	54	No	Yes	1	Yes	No	No	No	Yes	No	Yes	No	No	2	Some Information	35-49	highedu	urban	paid	Male
master only (1)	0.219528	54	No	Yes	1	Yes	No	No	No	No	No	No	No	No	0	No Information	35-49	seconedu	urban	paid	Male
master only (1)	0.266504	65	No	Yes	1	Yes	No	No	No	Yes	Yes	No	No	No	2	Some Information	25-34	primaryedu	rural	paid	Male
master only (1)	0.329192	55	No	Yes	1	Yes	No	No	No	Yes	Yes	No	No	No	2	Some Information	35-49	seconedu	rural	paid	Male
master only (1)	0.365896	57	No	Yes	1	Yes	No	No	No	No	Yes	No	No	No	1	Some Information	35-49	seconedu	rural	paid	Male
master only (1)	0.371906	37	No	Yes	1	Yes	No	No	No	No	No	No	No	Yes	1	Some Information	15-24	seconedu	rural	paid	Male
master only (1)	0.412632	37	No	Yes	1	Yes	No	No	No	No	No	No	No	Yes	1	Some Information	35-49	seconedu	rural	no paid	Male
master only (1)	0.480079	37	No	Yes	1	Yes	No	No	No	Yes	No	No	No	No	1	Some Information	35-49	primaryedu	rural	paid	Male
master only (1)	0.502123	51	No	Yes	1	Yes	No	No	No	Yes	No	No	No	Yes	2	Some Information	25-34	highedu	rural	paid	Male
master only (1)	0.760195	4	No	Yes	1	Yes	No	No	No	Yes	No	No	No	No	1	Some Information	35-49	seconedu	rural	paid	Male
master only (1)	0.852634	21	No	Yes	1	Yes	No	Yes	No	Yes	No	No	No	Yes	3	Some Information	35-49	highedu	urban	paid	Male
master only (1)	0.855234	21	No	Yes	1	Yes	No	No	No	Yes	No	No	No	No	1	Some Information	35-49	primaryedu	urban	paid	Male
master only (1)	0.873901	53	No	Yes	1	Yes	No	No	No	Yes	Yes	No	No	No	2	Some Information	35-49	seconedu	rural	paid	Male
master only (1)	0.878629	32	No	Yes	1	Yes	No	Yes	Yes	Yes	No	No	No	No	3	Some Information	35-49	primaryedu	urban	paid	Male
master only (1)	0.885825	49	No	Yes	1	Yes	No	No	Yes	Yes	No	No	No	No	2	Some Information	35-49	seconedu	rural	no paid	Male
master only (1)	0.940793	26	No	Yes	1	Yes	No	No	Yes	Yes	No	No	No	No	2	Some Information	50-54	seconedu	urban	paid	Male
master only (1)	1.03814	67	No	Yes	1	Yes	No	No	No	No	Yes	No	No	No	1	Some Information	35-49	seconedu	rural	paid	Male
master only (1)	1.07154	4	No	Yes	1	Yes	No	No	Yes	Yes	No	No	No	No	2	Some Information	35-49	seconedu	rural	paid	Male
master only (1)	1.13038	33	No	Yes	1	Yes	No	No	No	No	No	No	No	No	0	No Information	50-54	primaryedu	rural	paid	Male
master only (1)	1.21808	20	No	Yes	1	Yes	No	No	Yes	No	Yes	No	No	No	2	Some Information	25-34	seconedu	rural	paid	Male
master only (1)	1.24977	4	No	Yes	1	Yes	No	No	No	Yes	No	No	No	No	1	Some Information	35-49	seconedu	rural	no paid	Male
master only (1)	1.29217	21	No	Yes	1	Yes	Yes	No	No	No	No	No	No	No	1	Some Information	25-34	primaryedu	urban	paid	Male
master only (1)	1.33716	22	No	Yes	1	Yes	No	No	Yes	No	Yes	No	No	No	2	Some Information	50-54	seconedu	urban	paid	Male
master only (1)	1.45579	31	No	Yes	1	Yes	Yes	Yes	Yes	Yes	No	Yes	No	No	5	More Information	35-49	seconedu	rural	paid	Male
master only (1)	1.4646	22	No	Yes	1	Yes	No	No	No	Yes	No	Yes	No	No	2	Some Information	50-54	seconedu	urban	paid	Male
master only (1)	1.51123	22	No	Yes	1	Yes	No	Yes	No	Yes	Yes	No	No	No	3	Some Information	35-49	primaryedu	urban	paid	Male
master only (1)	1.65187	24	No	Yes	1	Yes	No	No	No	Yes	No	No	No	No	1	Some Information	50-54	primaryedu	urban	paid	Male
master only (1)	1.70091	24	No	Yes	1	Yes	No	No	No	Yes	No	No	No	No	1	Some Information	35-49	seconedu	urban	paid	Male
master only (1)	1.9519	28	No	Yes	1	Yes	No	No	No	Yes	No	No	No	No	1	Some Information	35-49	seconedu	urban	paid	Male
[truncated: 26,880 more rows]
